# Supplementary material
Source: PubMed Central journal article supplement (PMC3922238)
Supplement: NIHMS549672-supplement-Suppl.pdf [file NIHMS549672-supplement-Suppl.pdf]

## Supplemental Material

### Identification of Alverine and Benfluorex as HNF4 $\alpha$ Activators

Seung-Hee Lee, Sonalee Athavankar, Tom Cohen, Ron Piran, Alice Kiselyuk, and Fred Levine

Sanford Children's Health Research Center, Sanford-Burnham Medical Research Institute, La Jolla, California, 92037 USA.

Lee et al Supplemental Table 1

| CODE     | MOLENAME                      | cas#                          |
|----------|-------------------------------|-------------------------------|
| 01500161 | CARBINOXAMINE MALEATE         | 3505-38-2, 486-16-8           |
| 01500111 | AMIKACIN SULFATE              | 39831-55-5, 37517-28-5        |
| 01500169 | CETYLPYRIDINIUM CHLORIDE      | 6004-24-6, 123-03-5           |
| 01500133 | AZATHIOPRINE                  | 446-86-6                      |
| 01500143 | beta-CAROTENE                 | 7235-40-7                     |
| 01500187 | CHLORTHALIDONE                | 77-36-1                       |
| 01500165 | CEFOTAXIME SODIUM             | 64485-93-4, 63527-52-6        |
| 01500180 | CHLOROTHIAZIDE                | 58-94-6                       |
| 01500188 | CHLORZOXAZONE                 | 95-25-0                       |
| 01500146 | BETHANECHOL CHLORIDE          | 590-63-6, 674-38-4            |
| 01500102 | ACETAZOLAMIDE                 | 59-66-5                       |
| 01500112 | AMILORIDE HYDROCHLORIDE       | 17440-83-4, 2016-88-8         |
| 01500122 | AMPHOTERICIN B                | 1397-89-3                     |
| 01500134 | BACITRACIN                    | 1405-87-4                     |
| 01500144 | BETAMETHASONE                 | 378-44-9                      |
| 01500158 | CARBACHOL                     | 51-83-2                       |
| 01500166 | CEPHALOTHIN SODIUM            | 58-71-9, 153-61-7             |
| 01500182 | CHLOROXYLENOL                 | 88-04-0                       |
| 01500189 | CICLOPIROX OLAMINE            | 41621-49-2                    |
| 01500201 | CLOXACILLIN SODIUM            | 7081-44-9, 642-78-4           |
| 01500103 | ACETOHYDROXAMIC ACID          | 546-88-3                      |
| 01500113 | POTASSIUM p-AMINOBENZOATE     |                               |
| 01500123 | AMPICILLIN SODIUM             | 69-52-3, 69-53-4 [ampicillin] |
| 01500135 | BACLOFEN                      | 1134-47-0                     |
| 01500198 | CLONIDINE HYDROCHLORIDE       | 4205-91-8, 4205-90-7          |
| 01500159 | CARBAMAZEPINE                 | 298-46-4                      |
| 01500167 | CEPHAPIRIN SODIUM             | 24356-60-3, 21593-23-7        |
| 01500181 | CHLOROTRIANISENE              | 569-57-3                      |
| 01500190 | CINOXACIN                     | 28657-80-9                    |
| 01500202 | CLOXYQUIN                     | 130-16-5                      |
| 01500120 | AMOXICILLIN                   | 61336-70-7, 26787-78-0        |
| 01500114 | 6-AMINOCAPROIC ACID           | 60-32-2                       |
| 01500124 | AMPROLIUM                     | 121-25-5                      |
| 01500137 | BENSERAZIDE HYDROCHLORIDE     | 322-35-0                      |
| 01500147 | BISACODYL                     | 603-50-9                      |
| 01500160 | CARBENICILLIN DISODIUM        | 4800-94-6, 4697-36-3          |
| 01500105 | ACETYLCYSTEINE                | 616-91-1                      |
| 01500183 | CHLORPHENIRAMINE (S) MALEATE  | 113-92-8, 132-22-9            |
| 01500191 | CLEMASTINE                    | 15686-51-8                    |
| 01500205 | COLCHICINE                    | 64-86-8                       |
| 01500107 | ADENOSINE                     | 58-61-7                       |
| 01500115 | AMINOGLUTETHIMIDE             | 125-84-8                      |
| 01500101 | ACETAMINOPHEN                 | 103-90-2                      |
| 01500138 | BENZETHONIUM CHLORIDE         | 121-54-0                      |
| 01500148 | BITHIONOL                     | 97-18-7                       |
| 01500127 | ANTHRALIN                     | 480-22-8, 1143-38-0           |
| 01500173 | CHLORAMPHENICOL HEMISUCCINATE | 982-57-0, 56-75-7             |
| 01500184 | CHLORPROMAZINE                | 50-53-3                       |
| 01500192 | CLIDINIUM BROMIDE             | 3485-62-9                     |
| 01500206 | COLISTIMETHATE SODIUM         | 8068-28-8, 21362-08-3         |

Lee et al Supplemental Table 1

|          |                                 |                                |
|----------|---------------------------------|--------------------------------|
| 01500208 | COTININE                        | 5695-98-7, 486-56-6 [cotinine] |
| 01500116 | SODIUM p-AMINOSALICYLATE        |                                |
| 01500128 | ANTIPYRINE                      | 60-80-0                        |
| 01500139 | BENZOCAINE                      | 94-09-7                        |
| 01500152 | BUSULFAN                        | 55-98-1                        |
| 01500162 | CARISOPRODOL                    | 78-44-4                        |
| 01500174 | CHLORAMPHENICOL                 | 56-75-7                        |
| 01500185 | CHLORPROPAMIDE                  | 94-20-2                        |
| 01500193 | CLINDAMYCIN HYDROCHLORIDE       | 21462-39-5, 58207-19-5         |
| 01500108 | ALLOPURINOL                     | 315-30-0                       |
| 01500109 | ALVERINE CITRATE                | 5560-59-8, 150-59-4 [alverine] |
| 01500117 | AMITRIPTYLINE HYDROCHLORIDE     | 549-18-8, 50-48-6              |
| 01500129 | APOMORPHINE HYDROCHLORIDE       | 41372-20-7, 314-19-2           |
| 01500141 | BENZTHIAZIDE                    | 91-33-8                        |
| 01500155 | CAFFEINE                        | 58-08-2, 5743-12-4             |
| 01500163 | CEFADROXIL                      | 66592-87-8, 50370-12-2         |
| 01500178 | CHLOROCRESOL                    | 59-50-7                        |
| 01500186 | CHLORTETRACYCLINE HYDROCHLORIDE | 64-72-2                        |
| 01500195 | CLOFIBRIC ACID                  | 882-09-7                       |
| 01500207 | CORTISONE ACETATE               | 50-04-4, 53-06-5 [cortisone]   |
| 01500110 | AMANTADINE HYDROCHLORIDE        | 665-66-7, 768-94-5             |
| 01500119 | AMODIAQUINE DIHYDROCHLORIDE     | 6398-98-7, 69-44-3             |
| 01500131 | ATROPINE                        | 51-55-8, 5908-99-6 [atropine]  |
| 01500142 | BENZTROPINE                     | 132-17-2, 86-13-5              |
| 01500156 | 1R-CAMPHOR                      | 464-49-3; 76-22-2              |
| 01500164 | CEFAZOLIN SODIUM                | 27164-46-1, 25953-19-9         |
| 01500179 | CHLOROQUINE DIPHOSPHATE         | 54-05-7                        |
| 01500157 | CAPREOMYCIN SULFATE             | 1405-37-4, 11003-38-6          |
| 01500196 | CLOMIPHENE CITRATE              | 50-41-9, 911-45-5              |
| 01500209 | CRESOL                          | 1319-77-3                      |
| 01500210 | CROMOLYN SODIUM                 | 15826-37-6, 16110-51-3         |
| 01500224 | DEFEROXAMINE MESYLATE           | 138-14-7, 70-51-9              |
| 01500236 | DIBUCAINE HYDROCHLORIDE         | 61-12-1, 85-79-0 [dibucaine]   |
| 01500249 | DIHYDROSTREPTOMYCIN SULFATE     | 5490-27-7, 128-46-1            |
| 01500262 | DISULFIRAM                      | 97-77-8                        |
| 01500282 | ESTRADIOL                       | 50-28-2                        |
| 01500293 | ETHOPROPAZINE HYDROCHLORIDE     | 1094-08-2, 522-00-9            |
| 01500311 | FUSIDIC ACID                    | 6990-06-3                      |
| 01500323 | GUANETHIDINE SULFATE            | 60-02-6, 55-65-2               |
| 01500333 | HOMATROPINE METHYLBROMIDE       | 80-49-9, 87-00-3               |
| 01500211 | CYCLIZINE                       | 82-92-8                        |
| 01500225 | SODIUM DEHYDROCHOLATE           |                                |
| 01500237 | DICLOFENAC SODIUM               | 15307-79-6                     |
| 01500251 | DIMENHYDRINATE                  | 523-87-5                       |
| 01500263 | DOPAMINE HYDROCHLORIDE          | 62-31-7, 51-61-6 [dopamine]    |
| 01500283 | ESTRADIOL CYPIONATE             | 313-06-4                       |
| 01500296 | EUGENOL                         | 97-53-0                        |
| 01500312 | GALLAMINE                       | 65-29-2, 153-76-4 [gallamine]  |
| 01500324 | HALAZONE                        | 80-13-7                        |
| 01500334 | HYDRALAZINE HYDROCHLORIDE       | 304-20-1, 86-54-4              |
| 01500212 | CYCLOPENTOLATE HYDROCHLORIDE    | 5870-29-1, 512-15-2            |

Lee et al Supplemental Table 1

|          |                                       |                                |
|----------|---------------------------------------|--------------------------------|
| 01500226 | DEMECLOCYCLINE HYDROCHLORIDE          | 127-33-3                       |
| 01500238 | DICLOXACILLIN SODIUM                  | 13412-64-1, 343-55-5           |
| 01500255 | DIOXYBENZONE                          | 131-53-3                       |
| 01500268 | DYCLONINE HYDROCHLORIDE               | 536-43-6, 586-60-7 [dyclonine] |
| 01500284 | ESTRADIOL VALERATE                    | 979-32-8                       |
| 01500299 | FLUDROCORTISONE ACETATE               | 514-36-3, 127-31-1             |
| 01500313 | GEMFIBROZIL                           | 25812-30-0                     |
| 01500325 | HALOPERIDOL                           | 52-86-8                        |
| 01500335 | HYDROCHLOROTHIAZIDE                   | 58-93-5                        |
| 01500213 | CYCLOPHOSPHAMIDE HYDRATE              | 6055-19-2, 50-18-0             |
| 01500227 | DESIPRAMINE HYDROCHLORIDE             | 58-28-6, 50-47-5 [desipramine] |
| 01500239 | DICUMAROL                             | 66-76-2                        |
| 01500256 | DIPHENHYDRAMINE HYDROCHLORIDE         | 147-24-0                       |
| 01500269 | DYPHYLLINE                            | 479-18-5                       |
| 01500285 | ESTRIOL                               | 50-27-1, 514-68-1 [as,         |
| 01500303 | FLUOCINONIDE                          | 356-12-7                       |
| 01500314 | GENTAMICIN SULFATE                    | 1405-41-0, 1403-66-3           |
| 01500327 | HETACILLIN POTASSIUM                  | 5321-32-4, 3511-16-8           |
| 01500338 | HYDROCORTISONE ACETATE                | 50-03-3                        |
| 01500215 | CYCLOSERINE                           | 68-41-7                        |
| 01500231 | DEXAMETHASONE ACETATE                 | 55812-90-3, 1177-87-3          |
| 01500241 | DIENESTROL                            | 84-17-3, 13029-44-2 [//E,E//]  |
| 01500258 | DIPHENYLPYRALINE HYDROCHLORIDE        | 132-18-3 147-20-6              |
| 01500270 | TRISODIUM ETHYLENEDIAMINE TETRACETATE |                                |
| 01500286 | ESTRONE                               | 53-16-7                        |
| 01500305 | FLUOROURACIL                          | 51-21-8                        |
| 01500315 | GENTIAN VIOLET                        | 548-62-9                       |
| 01500328 | HEXACHLOROPHENE                       | 70-30-4                        |
| 01500341 | HYDROFLUMETHIAZIDE                    | 135-09-1                       |
| 01500217 | CYTARABINE                            | 147-94-4                       |
| 01500232 | DEXAMETHASONE SODIUM PHOSPHATE        | 2392-39-4, 312-93-6            |
| 01500242 | DIETHYLCARBAMAZINE CITRATE            | 1642-54-2, 90-89-1             |
| 01500259 | DIPYRIDAMOLE                          | 58-32-2                        |
| 01500272 | EMETINE                               | 316-42-7, 483-18-1 [emetine]   |
| 01500288 | ETHAMBUTOL HYDROCHLORIDE              | 1070-11-7, 74-55-5             |
| 01500308 | FLURBIPROFEN                          | 5104-49-4                      |
| 01500316 | GLUCOSAMINE HYDROCHLORIDE             | 3416-24-8                      |
| 01500330 | HEXYLRESORCINOL                       | 136-77-6                       |
| 01500343 | HYDROXYPROGESTERONE CAPROATE          | 630-56-8, 68-96-2              |
| 01500220 | DANAZOL                               | 17230-88-5                     |
| 01500233 | DEXTROMETHORPHAN HYDROBROMIDE         | 6700-34-1, 125-69-9            |
| 01500245 | DIFLUNISAL                            | 22494-42-4                     |
| 01500260 | PYRITHIONE ZINC                       | 13463-41-7                     |
| 01500274 | ADRENALINE BITARTRATE                 |                                |
| 01500291 | ETHINYL ESTRADIOL                     | 57-63-6                        |
| 01500309 | FURAZOLIDONE                          | 67-45-8                        |
| 01500321 | GUAIFENESIN                           | 93-14-1                        |
| 01500331 | HISTAMINE DIHYDROCHLORIDE             | 51-45-6 [histamine]            |
| 01500344 | HYDROXYUREA                           | 127-07-1                       |
| 01500222 | DAPSONE                               | 80-08-0                        |
| 01500235 | DIBENZOTHIOPHENE                      | 132-65-0                       |

Lee et al Supplemental Table 1

|          |                               |                                  |
|----------|-------------------------------|----------------------------------|
| 01500247 | DIGOXIN                       | 20830-75-5                       |
| 01500261 | DISOPYRAMIDE PHOSPHATE        | 3737-09-5                        |
| 01500277 | ERGONOVINE MALEATE            | 129-51-1, 60-79-7 [ergonovine]   |
| 01500292 | ETHIONAMIDE                   | 536-33-4                         |
| 01500310 | FUROSEMIDE                    | 54-31-9                          |
| 01500322 | GUANABENZ ACETATE             | 23256-50-0                       |
| 01500332 | HOMATROPINE BROMIDE           | 51-56-9, 87-00-3                 |
| 01500345 | HYDROXYZINE PAMOATE           | 10246-75-0, 68-88-2              |
| 01500246 | DIGITOXIN                     | 71-63-6                          |
| 01500355 | ISONIAZID                     | 54-85-3                          |
| 01500365 | LEVONORDEFIN                  | 829-74-3, 18829-78-2             |
| 01500379 | MEDROXYPROGESTERONE ACETATE   | 71-58-9, 520-85-4                |
| 01500397 | METHOCARBAMOL                 | 532-03-6                         |
| 01500413 | MICONAZOLE NITRATE            | 22832-87-7, 22916-47-8           |
| 01500428 | NEOSTIGMINE BROMIDE           | 114-80-7, 59-99-4                |
| 01500439 | NORETHYNODREL                 | 68-23-5                          |
| 01500447 | ORPHENADRINE CITRATE          | 4682-36-4, 83-98-7               |
| 01500464 | PENICILLAMINE                 | 52-67-5                          |
| 01500346 | HYOSCYAMINE                   | 101-31-5                         |
| 01500356 | ISOPROPAMIDE IODIDE           | 71-81-8, 7492-32-2               |
| 01500368 | LINCOMYCIN HYDROCHLORIDE      | 7179-49-9, 859-18-7              |
| 01500380 | MEDRYSONE                     | 2668-66-8                        |
| 01500398 | METHOTREXATE                  | 59-05-2                          |
| 01500415 | MINOXIDIL                     | 38304-91-5                       |
| 01500430 | NIACIN                        | 59-67-6                          |
| 01500440 | NORFLOXACIN                   | 70458-96-7                       |
| 01500448 | OXACILLIN SODIUM              | 7240-38-2, 1173-88-2             |
| 01500465 | BENZYL PENICILLIN POTASSIUM   | 69-57-8, 61-33-6 [penicillin, G] |
| 01500347 | IBUPROFEN                     | 15687-27-1, 58560-75-1 [(+/-)]   |
| 01500357 | ISOPROTERENOL HYDROCHLORIDE   | 51-30-9, 7683-59-2               |
| 01500372 | MAFENIDE HYDROCHLORIDE        | 138-39-6                         |
| 01500381 | MEGESTROL ACETATE             | 595-33-5, 3562-63-8              |
| 01500400 | METHOXSALEN                   | 298-81-7                         |
| 01500418 | MOXALACTAM DISODIUM           | 8031-09-2                        |
| 01500431 | NIFEDIPINE                    | 21829-25-4                       |
| 01500441 | NORGESTREL                    | 6533-00-2                        |
| 01500451 | OXYBENZONE                    | 131-57-7                         |
| 01500473 | PHENAZOPYRIDINE HYDROCHLORIDE | 136-40-3, 94-78-0                |
| 01500348 | IMIPRAMINE HYDROCHLORIDE      | 113-52-0, 50-49-7 [imipramine]   |
| 01500358 | ISOSORBIDE DINITRATE          | 87-33-2                          |
| 01500373 | MAPROTILINE HYDROCHLORIDE     | 10347-81-6, 10262-69-8           |
| 01500383 | MEPENZOLATE BROMIDE           | 76-90-4, 25990-43-6              |
| 01500401 | METHSCOPOLAMINE BROMIDE       | 155-41-9                         |
| 01500420 | NAFCILLIN SODIUM              | 7177-50-6, 985-16-0              |
| 01500433 | NITROFURANTOIN                | 67-20-9, 54-87-5                 |
| 01500442 | NORTRIPTYLINE                 | 894-71-3, 72-69-5                |
| 01500453 | OXYMETAZOLINE HYDROCHLORIDE   | 2315-02-8, 1491-59-4             |
| 01500476 | PHENELZINE SULFATE            | 156-51-4, 51-71-8 [phenelzine]   |
| 01500349 | INDAPAMIDE                    | 26807-65-8                       |
| 01500359 | ISOXSUPRINE HYDROCHLORIDE     | 579-56-6, 395-28-8               |
| 01500374 | MECAMYLAMINE HYDROCHLORIDE    | 826-39-1, 60-40-2                |

Lee et al Supplemental Table 1

|          |                                         |                                 |
|----------|-----------------------------------------|---------------------------------|
| 01500387 | MERCAPTOPYRINE                          | 6112-76-1, 50-44-2              |
| 01500403 | METHYLDOPA                              | 41372-08-1, 555-30-6            |
| 01500422 | NALOXONE HYDROCHLORIDE                  | 357-08-4, 51481-60-8            |
| 01500434 | NITROFURAZONE                           | 59-87-0                         |
| 01500443 | NOSCAPINE HYDROCHLORIDE                 | 912-60-7, 128-62-1              |
| 01500456 | OXYQUINOLINE HEMISULFATE                | 148-24-3                        |
| 01500477 | PHENINDIONE                             | 83-12-5                         |
| 01500350 | INDOMETHACIN                            | 53-86-1                         |
| 01500360 | KANAMYCIN SULFATE                       | 25389-94-0, 133-92-6            |
| 01500375 | MECHLORETHAMINE                         | 55-86-7, 51-75-2                |
| 01500390 | METAPROTERENOL                          | 586-06-1, 5874-97-5             |
| 01500410 | METOCLOPRAMIDE HYDROCHLORIDE            | 54143-57-6, 7232-21-5           |
| 01500424 | NAPHAZOLINE HYDROCHLORIDE               | 550-99-2, 835-31-4              |
| 01500435 | NITROMIDE                               | 121-81-3                        |
| 01500444 | NOVOBIOCIN SODIUM                       | 1476-53-5, 303-81-1             |
| 01500457 | OXYTETRACYCLINE                         | 6153-64-6, 79-57-2              |
| 01500484 | 1S,2R-PHENYLPROPANOLAMINE HYDROCHLORIDE |                                 |
| 01500351 | INDOPROFEN                              | 31842-01-0                      |
| 01500362 | KETOCONAZOLE                            | 65277-42-1                      |
| 01500376 | MECLIZINE HYDROCHLORIDE                 | 31884-77-2, 1104-22-9           |
| 01500394 | METHENAMINE                             | 100-97-0                        |
| 01500411 | METOPROLOL TARTRATE                     | 56392-17-7, 37350-58-6          |
| 01500425 | NAPROXEN(+)                             |                                 |
| 01500436 | NOREPINEPHRINE                          | 69815-49-2, 51-40-1             |
| 01500445 | NYLIDRIN HYDROCHLORIDE                  | 1400-61-9                       |
| 01500459 | PAPAVERINE HYDROCHLORIDE                | 61-25-6, 58-74-2 [papaverine]   |
| 01500485 | PHENYTOIN SODIUM                        | 630-93-3, 57-41-0 [phenytoin]   |
| 01500353 | IDOQUINOL                               | 83-73-8                         |
| 01500364 | LEUCOVORIN CALCIUM                      |                                 |
| 01500377 | SODIUM MECLOFENAMATE                    |                                 |
| 01500396 | METHIMAZOLE                             | 60-56-0                         |
| 01500412 | METRONIDAZOLE                           | 443-48-1, 69198-10-3            |
| 01500427 | NEOMYCIN SULFATE                        | 1405-10-3, 1404-04-2            |
| 01500438 | NORETHINDRONE ACETATE                   | 51-98-9                         |
| 01500446 | NYSTATIN                                | 114-90-9                        |
| 01500460 | PARACHLOROPHENOL                        | 106-48-9                        |
| 01500486 | PHYSOSTIGMINE SALICYLATE                | 57-64-7, 57-47-6                |
| 01500487 | PILOCARPINE NITRATE                     | 148-72-1, 92-13-7 [pilocarpine] |
| 01500514 | PROPRANOLOL HYDROCHLORIDE (-)           | 318-98-9, 525-66-6              |
| 01500529 | RIFAMPIN                                | 13292-46-1                      |
| 01500543 | STREPTOZOSIN                            | 18883-66-4                      |
| 01500553 | SULFATHIAZOLE                           | 72-14-0                         |
| 01500581 | TOLBUTAMIDE                             | 64-77-7                         |
| 01500591 | TRIFLUOPERAZINE HYDROCHLORIDE           | 440-17-5, 117-89-5              |
| 01500600 | TRYPTOPHAN                              | 73-22-3 ['L']                   |
| 01500618 | ACRIFLAVINIUM HYDROCHLORIDE             |                                 |
| 01500641 | PENTAMIDINE ISETHIONATE                 | 100-33-4                        |
| 01500490 | PIPERAZINE                              | 110-85-0, 144-29-6              |
| 01500516 | PSEUDOEPHEDRINE HYDROCHLORIDE           | 345-78-8, 90-82-4               |
| 01500530 | ROXARSONE                               | 121-19-7                        |
| 01500545 | SULFACETAMIDE                           | 144-80-9, 127-56-0              |

Lee et al Supplemental Table 1

|          |                                 |                                 |
|----------|---------------------------------|---------------------------------|
| 01500556 | SULINDAC                        | 38194-50-2                      |
| 01500583 | TOLNAFTATE                      | 2398-96-1                       |
| 01500592 | TRIHEXYPHENIDYL HYDROCHLORIDE   |                                 |
| 01500601 | TUAMINOHEPTANE SULFATE          | 6411-75-2, 123-82-0             |
| 01500623 | BROXYQUINOLINE                  | 521-74-4                        |
| 01500642 | PHENACETIN                      | 62-44-2                         |
| 01500494 | PRAZIQUANTEL                    | 55268-74-1                      |
| 01500517 | PYRANTEL PAMOATE                | 22204-24-6, 15686-83-6          |
| 01500531 | SALICYL ALCOHOL                 | 90-01-7                         |
| 01500546 | SULFADIAZINE                    | 68-35-9                         |
| 01500566 | TETRACYCLINE HYDROCHLORIDE      | 64-75-5, 60-54-8 [tetracycline] |
| 01500584 | TRANLYCYPROMINE SULFATE         | 13492-01-8, 7081-36-9           |
| 01500593 | TRIMEPRAZINE TARTRATE           | 4330-99-8, 41375-66-0           |
| 01500603 | TYROTHRIN                       | 1404-88-2                       |
| 01500624 | CARNITINE HYDROCHLORIDE         | 461-06-3                        |
| 01500644 | PHENYLMERCURIC ACETATE          | 62-38-4                         |
| 01500500 | PRIMAQUINE DIPHOSPHATE          | 63-45-6, 90-34-6 [primaquine]   |
| 01500520 | PYRIMETHAMINE                   | 58-14-0                         |
| 01500534 | SCOPOLAMINE HYDROBROMIDE        | 6533-68-2, 114-49-8             |
| 01500547 | SULFAMERAZINE                   | 127-79-7                        |
| 01500568 | THEOPHYLLINE                    | 5967-84-0, 58-55-9              |
| 01500585 | TRACETIN                        | 102-76-1                        |
| 01500594 | TRIMETHOBENZAMIDE HYDROCHLORIDE | 554-92-7, 138-56-7              |
| 01500605 | URSODIOL                        | 128-13-2                        |
| 01500632 | HEXESTROL                       | 5635-50-7                       |
| 01500645 | PREGNENOLONE                    | 145-13-1, 4598-67-8             |
| 01500505 | PROCHLORPERAZINE EDISYLATE      | 1257-78-9, 84-02-6              |
| 01500522 | QUINACRINE HYDROCHLORIDE        | 6151-30-0, 69-05-6              |
| 01500536 | SISOMICIN SULFATE               | 53179-09-2, 32385-11-8          |
| 01500548 | SULFAMETHAZINE                  | 57-68-1                         |
| 01500570 | THIABENDAZOLE                   | 148-79-8                        |
| 01500587 | TRIAMCINOLONE ACETONIDE         | 76-25-5                         |
| 01500595 | TRIMETHOPRIM                    | 738-70-5                        |
| 01500607 | VANCOMYCIN HYDROCHLORIDE        | 1404-93-9, 1404-90-6            |
| 01500633 | HEXETIDINE                      | 141-94-6                        |
| 01500648 | AZELAIC ACID                    | 123-99-9                        |
| 01500509 | PROMAZINE HYDROCHLORIDE         | 53-60-1, 58-40-2 [promazine]    |
| 01500523 | QUINIDINE GLUCONATE             | 7054-25-3, 6591-63-5            |
| 01500538 | SPECTINOMYCIN HYDROCHLORIDE     | 22189-32-8, 21736-83-4          |
| 01500550 | SULFAMETHOXAZOLE                | 723-46-6                        |
| 01500572 | THIMEROSAL                      | 54-64-8                         |
| 01500588 | TRIAMCINOLONE DIACETATE         | 67-78-7                         |
| 01500596 | TRIOXSALEN                      | 3902-71-4                       |
| 01500609 | VIDARABINE                      | 24356-66-9, 5536-17-4           |
| 01500634 | IPRONIAZID SULFATE              | 54-92-2, 305-33-9 [as           |
| 01500649 | THEOBROMINE                     | 83-67-0                         |
| 01500510 | PROMETHAZINE HYDROCHLORIDE      | 58-33-3, 60-87-7                |
| 01500524 | QUININE SULFATE                 | 6119-70-6, 804-63-7             |
| 01500539 | SPIRONOLACTONE                  | 52-01-7                         |
| 01500551 | SULFAPYRIDINE                   | 144-83-2                        |
| 01500573 | THIOGUANINE                     | 154-42-7, 5580-03-0             |

Lee et al Supplemental Table 1

|          |                                  |                        |
|----------|----------------------------------|------------------------|
| 01500589 | TRIAMTERENE                      | 396-01-0               |
| 01500598 | TRIPROLIDINE HYDROCHLORIDE       | 6138-79-0, 550-70-9    |
| 01500614 | XYLOMETAZOLINE HYDROCHLORIDE     | 1218-35-5, 526-36-3    |
| 01500637 | MERBROMIN                        | 129-16-8               |
| 01500656 | AJMALINE                         | 4360-17-7              |
| 01500511 | PROPANTHELINE BROMIDE            | 50-34-0, 298-50-0      |
| 01500527 | RESORCINOL                       | 108-46-3               |
| 01500541 | STREPTOMYCIN SULFATE             | 3810-74-0, 57-92-1     |
| 01500552 | SULFASALAZINE                    | 599-79-1               |
| 01500578 | TIMOLOL MALEATE                  | 26921-17-5, 91524-16-2 |
| 01500590 | TRICHLORMETHIAZIDE               | 133-67-5               |
| 01500599 | TROPICAMIDE                      | 1508-75-4              |
| 01500615 | ZOMEPIRAC SODIUM                 | 64092-49-5, 64092-48-4 |
| 01500639 | OCTOPAMINE HYDROCHLORIDE         | 104-14-3               |
| 01500657 | HYDROQUINIDINE                   |                        |
| 01500668 | KETOTIFEN FUMARATE               | 34580-14-8, 34580-13-7 |
| 01500674 | MYCOPHENOLIC ACID                | 24280-93-1             |
| 01500688 | KYNURENIC ACID                   |                        |
| 01500750 | NEOHESPERIDIN DIHYDROCHALCONE    |                        |
| 01500764 | KINETIN                          | 525-79-1               |
| 01500804 | ALTHIAZIDE                       | 5588-16-9              |
| 01500872 | PALMATINE CHLORIDE               | 10605-02-4             |
| 01501004 | DROPROPIZINE                     | 17692-31-8             |
| 01501019 | BERBAMINE HYDROCHLORIDE          | 478-61-5 (berbamine)   |
| 01501111 | PROTOPORPHYRIN IX                |                        |
| 01500663 | YOHIMBINE HYDROCHLORIDE          |                        |
| 01500675 | OLEANDOMYCIN PHOSPHATE           |                        |
| 01500689 | LIDOCAINE HYDROCHLORIDE          | 6108-05-0, 73-78-9     |
| 01500752 | QUERCITRIN                       | 522-12-3               |
| 01500765 | NARINGIN                         | 10236-47-2             |
| 01500811 | BERBERINE CHLORIDE               | 633-65-8, 2086-83-1    |
| 01500873 | PIPERINE                         | 94-62-2                |
| 01501005 | ETODOLAC                         | 41340-25-4             |
| 01501026 | FENDILINE HYDROCHLORIDE          |                        |
| 01501115 | NALBUPHINE HYDROCHLORIDE         | 23277-43-2, 20594-83-6 |
| 01500669 | BENFLUOREX HYDROCHLORIDE         | 23602-78-0             |
| 01500676 | OUABAIN                          | 11018-89-6, 630-60-4   |
| 01500695 | ACETYL TYROSINE ETHYL ESTER      |                        |
| 01500753 | ESERINE                          | 57-47-6                |
| 01500767 | BUTAMBEN                         | 94-25-7                |
| 01500828 | CANRENOIC ACID, POTASSIUM SALT   | 2181-04-6, 4138-96-9   |
| 01500901 | AESCULIN                         | 531-75-9               |
| 01501007 | FENOTEROL HYDROBROMIDE           | 13392-18-2             |
| 01501104 | METHACYCLINE HYDROCHLORIDE       | 3963-95-9, 914-00-1    |
| 01501116 | MEBHYDROLIN NAPHTHALENESULFONATE | 524-81-2               |
| 01500646 | SULFANILAMIDE                    | 63-74-1                |
| 01500679 | AMINOPTERIN                      | 54-62-6, 58602-66-7    |
| 01500699 | ACETYLTRYPTOPHANAMIDE            |                        |
| 01500754 | XANTHURENIC ACID                 |                        |
| 01500771 | CEFACLOR                         | 70356-03-5, 53994-73-3 |
| 01500865 | HARMALOL HYDROCHLORIDE           | 6028-07-5              |



Lee et al Supplemental Table 1

|          |                                 |                               |
|----------|---------------------------------|-------------------------------|
| 01500938 | PROTOVERATRINE B                | 124-97-0                      |
| 01501008 | FENBUFEN                        | 36330-85-5                    |
| 01501105 | PUROMYCIN HYDROCHLORIDE         | 58-58-2, 53-79-2 [puromycin]  |
| 01501117 | MEBEVERINE HYDROCHLORIDE        | 2753-45-9, 3625-06-7          |
| 01500651 | STRYCHNINE                      | 57-24-9                       |
| 01500680 | ARECOLINE HYDROBROMIDE          | 300-08-3, 63-75-2 [arecoline] |
| 01500704 | N-ACETYLPROLINE                 |                               |
| 01500758 | LOBELINE HYDROCHLORIDE          | 90-69-7                       |
| 01500772 | IODIPAMIDE                      | 606-17-7, 2618-26-0           |
| 01500864 | HARMALINE                       | 304-21-2                      |
| 01500989 | 1 $\alpha$ -GLYCYRRHETINIC ACID |                               |
| 01501009 | 1R,9S-HYDRASTINE                |                               |
| 01501107 | PICROTOXININ                    | 17617-45-7                    |
| 01501118 | MECLOCYCLINE SULFOSALICYLATE    | 73816-42-9, 2013-58-3         |
| 01500672 | QUERCETIN                       | 117-39-5                      |
| 01500682 | CAPTOPRIL                       | 62571-86-2                    |
| 01500707 | CITROPTEN                       |                               |
| 01500760 | HECOGENIN                       |                               |
| 01500774 | THYROXINE                       | 51-48-9                       |
| 01500867 | HARMINE                         | 442-51-3                      |
| 01500992 | FLUMEQUINE                      | 42835-25-6                    |
| 01501010 | FENOFIBRATE                     | 49562-28-9                    |
| 01501108 | MEFEXAMIDE                      | 1227-61-8                     |
| 01501119 | PROGLUMIDE                      | 6620-60-6                     |
| 01500606 | VALPROATE SODIUM                | 1069-66-5, 99-66-1 [valproic  |
| 01500684 | CIMETIDINE                      | 51481-61-9                    |
| 01500709 | CHRYSIN                         | 480-40-0                      |
| 01500763 | CALCEIN                         |                               |
| 01500802 | ALLOXAN                         | 2244-11-3                     |
| 01500869 | MIMOSINE                        |                               |
| 01500994 | FLUFENAZINE HYDROCHLORIDE       |                               |
| 01501011 | FENOPROFEN                      | 31879-05-7                    |
| 01501109 | PROBUCOL                        | 23288-49-5                    |
| 01501120 | MINAPRINE HYDROCHLORIDE         | 25953-17-7, 25905-77-5        |
| 01500673 | MOLSIDOMINE                     | 25717-80-0                    |
| 01500685 | CLOZAPINE                       | 5786-21-0                     |
| 01500746 | NARINGENIN                      | 480-41-1                      |
| 01500761 | GUANIDINE CARBONATE             |                               |
| 01500801 | ALLANTOIN                       | 97-59-6                       |
| 01500871 | NORHARMAN                       | 244-63-3                      |
| 01501003 | FAMOTIDINE                      | 76824-35-6                    |
| 01501016 | FENBENDAZOLE                    | 43210-67-9                    |
| 01501110 | MEBENDAZOLE                     | 31431-39-7                    |
| 01501121 | MEMANTINE HYDROCHLORIDE         | 19982-08-2                    |
| 01501125 | 3-AMINOPROPANESULPHONIC ACID    |                               |
| 01501137 | NEFOPAM                         | 23327-57-3, 13669-70-0        |
| 01501157 | SUXIBUZONE                      | 27470-51-5                    |
| 01501183 | ESTRADIOL METHYL ETHER          | 1035-77-4                     |
| 01501203 | RETINOL                         | 68-26-8                       |
| 01502012 | FOSFOSAL                        | 6064-83-1                     |
| 01502033 | CEFUROXIME SODIUM               | 56238-63-2                    |

Lee et al Supplemental Table 1

|          |                                     |                              |
|----------|-------------------------------------|------------------------------|
| 01502046 | BEZAFIBRATE                         | 41859-67-0                   |
| 01502085 | CYCLOCREATINE                       |                              |
| 01502116 | 1,2-DIMETHYLHYDRAZINE HYDROCHLORIDE |                              |
| 01501126 | 5-AMINOPENTANOIC ACID HYDROCHLORIDE |                              |
| 01501138 | PIRENZEPINE HYDROCHLORIDE           | 29868-97-1, 28797-61-7       |
| 01501161 | SUPROFEN                            | 40828-46-4                   |
| 01501184 | ESTRADIOL ACETATE                   |                              |
| 01501204 | LAPACHOL                            | 84-79-7                      |
| 01502014 | MESNA                               | 19767-45-4, 3375-50-6 [2-    |
| 01502034 | METAMPICILLIN SODIUM                | 6489-97-0                    |
| 01502047 | LIOTHYRONINE SODIUM                 | 55-06-1, 6893-02-3           |
| 01502095 | alpha-CYANO-3-HYDROXYCINNAMIC ACID  |                              |
| 01502117 | ATRACTYLOSIDE POTASSIUM             |                              |
| 01501127 | ATENOLOL                            | 29122-68-7                   |
| 01501139 | PRAMOXINE HYDROCHLORIDE             | 637-58-1, 140-65-8           |
| 01501170 | ACETAMINOSALOL                      | 118-57-0                     |
| 01501189 | 5-FLUORO-5'-DEOXYURIDINE            |                              |
| 01501215 | KETOPROFEN                          | 22071-15-4                   |
| 01502016 | TRETINON                            | 302-79-4                     |
| 01502037 | LOMEFLOXACIN HYDROCHLORIDE          | 98079-52-8, 98079-51-7       |
| 01502050 | CEPHALORIDINE                       | 50-59-9                      |
| 01502101 | PERILLIC ACID (-)                   | 7694-45-3                    |
| 01502126 | GUVACINE HYDROCHLORIDE              |                              |
| 01501129 | CARBETAPENTANE CITRATE              | 23142-01-0, 77-23-6          |
| 01501140 | MEPHENESIN                          | 59-47-2                      |
| 01501173 | ACETANILIDE                         | 103-84-4                     |
| 01501191 | ESTRIOL BENZYL ETHER                |                              |
| 01501217 | LISINOPRIL                          | 83915-83-7, 76547-98-3       |
| 01502018 | BRETYLIUM TOSYLATE                  | 61-75-6, 59-41-6 [bretylum]  |
| 01502039 | FOSFOMYCIN                          | 26472-47-9, 23112-90-5(acid) |
| 01502057 | 5-CHLOROINDOLE-2-CARBOXYLIC ACID    |                              |
| 01502102 | QUINOLINIC ACID                     |                              |
| 01502127 | TINIDAZOLE                          | 19387-91-8                   |
| 01501130 | AMINOPYRIDINE                       |                              |
| 01501143 | SULFAPHENAZOLE                      | 526-08-9                     |
| 01501174 | TODRALAZINE HYDROCHLORIDE           | 14679-73-3                   |
| 01501192 | ESTRADIOL-3-SULFATE, SODIUM SALT    |                              |
| 01502001 | ACETYL-L-LEUCINE                    | 99-15-0                      |
| 01502019 | FOSCARNET SODIUM                    | 63585-09-1                   |
| 01502041 | CEFAMANDOLE NAFATE                  | 42540-40-9, 34444-01-4       |
| 01502059 | 7-CHLOROKYNURENIC ACID              |                              |
| 01502103 | ANTHRAQUINONE                       |                              |
| 01502128 | CYCLOLEUCINE                        |                              |
| 01501132 | NEROL                               |                              |
| 01501151 | RANITIDINE                          | 66357-35-5                   |
| 01501178 | ESTRIOL METHYL ETHER                | 1474-53-9                    |
| 01501198 | TOLFENAMIC ACID                     | 13710-19-5                   |
| 01502004 | BUMETANIDE                          | 28395-03-1                   |
| 01502020 | FOLIC ACID                          | 59-30-3                      |
| 01502043 | PRALIDOXIME MESYLATE                | 154-97-2                     |
| 01502074 | 4-NAPHTHALIMIDOBUTYRIC ACID         |                              |

Lee et al Supplemental Table 1

|          |                                                 |                        |
|----------|-------------------------------------------------|------------------------|
| 01502106 | CARBOPLATIN                                     | 41575-94-4             |
| 01502130 | AMINOCYCLOPROPANECARBOXYLIC ACID                |                        |
| 01501133 | NICERGOLINE                                     | 27848-84-6             |
| 01501153 | SULOCTIDIL                                      | 54063-56-8             |
| 01501179 | ESTRADIOL PROPIONATE                            | 113-38-2               |
| 01501199 | ZAPRINAST                                       | 37762-06-4             |
| 01502005 | CARBENOXOLONE SODIUM                            | 7421-40-1, 5697-56-3   |
| 01502026 | TRANEXAMIC ACID                                 | 1197-18-8              |
| 01502044 | OFLOXACIN                                       | 82419-36-1             |
| 01502082 | INDOLE-2-CARBOXYLIC ACID                        | 1477-50-5              |
| 01502111 | 5-AZACYTIDINE                                   |                        |
| 01502153 | 5-NITRO-2-PHENYLPROPYLAMINO BENZOIC ACID [NPPB] |                        |
| 01501134 | PIMOZIDE                                        | 2062-78-4              |
| 01501154 | RONIDAZOLE                                      | 7681-76-7              |
| 01501181 | ESTRONE ACETATE                                 |                        |
| 01501202 | GALANTHAMINE HYDROBROMIDE                       | 357-70-0, 1953-04-4    |
| 01502006 | CARPROFEN                                       | 53716-49-7             |
| 01502031 | CEFOXITIN SODIUM                                | 66309-69-1, 61622-34-2 |
| 01502045 | PIROMIDIC ACID                                  | 19562-30-2             |
| 01502083 | N- (9-FLUORENYLMETHOXYCARBONYL)-L-LEUCINE       | 35661-60-0             |
| 01502113 | AZASERINE                                       | 115-02-6               |
| 01502173 | N-FORMYLMETHIONYL-LEUCYLPHENYLALANINE           |                        |
| 01502175 | N-FORMYLMETHIONYLPHENYLALANINE                  |                        |
| 01502198 | ANISINDIONE                                     | 117-37-3               |
| 01502214 | LYSYLPHENYLALANYLTYSOSINE                       |                        |
| 01502236 | ABRINE (L)                                      |                        |
| 01502258 | MONENSIN SODIUM (monensin A is shown)           | 22373-78-0, 17090-79-8 |
| 01503045 | ACEXAMIC ACID                                   | 57-08-9                |
| 01503080 | AMBROXOL HYDROCHLORIDE                          | 23828-92-4, 18683-91-5 |
| 01503127 | DEQUALINIUM CHLORIDE                            | 522-51-0, 6707-58-0    |
| 01503240 | PYRIDOSTIGMINE BROMIDE                          | 101-26-8, 155-97-5     |
| 01503234 | BETA-PROPIOLACTONE                              |                        |
| 01502177 | METHIONYL-LEUCYLPHENYLALANINE ACETATE           |                        |
| 01502202 | CYCLOSPORINE                                    | 59865-13-3             |
| 01502215 | S-METHYL-L-THIOCTRULLINE ACETATE                | 156719-41-4            |
| 01502237 | HARMOL HYDROCHLORIDE                            | 40580-83-4             |
| 01502259 | MORIN                                           | 480-16-0               |
| 01503059 | FLOXURIDINE                                     | 50-91-9                |
| 01503092 | GLUCONOLACTONE                                  | 90-80-2                |
| 01503134 | MENTHOL(-)                                      | 1490-04-6              |
| 01503242 | ISOXICAM                                        | 34552-84-6             |
| 01503228 | PAROMOMYCIN SULFATE                             | 1263-89-4, 7542-37-2   |
| 01502178 | LEUCINE ENKEPHALIN                              |                        |
| 01502203 | TROLEANDOMYCIN                                  | 2751-09-9              |
| 01502216 | S-(1,2-DICARBOXYETHYL)GLUTATHIONE               | 1115-52-2              |
| 01502239 | EBURNAMONINE                                    |                        |
| 01503006 | BENZYL ISOTHIOCYANATE                           |                        |
| 01503065 | ALTRETAMINE                                     | 645-05-6               |
| 01503094 | THIOXOLONE                                      |                        |
| 01503136 | THIAMPHENICOL                                   | 15318-45-3             |
| 01503243 | LABETALOL HYDROCHLORIDE                         | 32780-64-6, 36894-69-6 |

Lee et al Supplemental Table 1

|          |                                        |                               |
|----------|----------------------------------------|-------------------------------|
| 01503245 | LEVAMISOLE HYDROCHLORIDE               | 16595-80-5, 14769-73-4        |
| 01502186 | LYSYL-TYROSYL-LYSINE ACETATE           |                               |
| 01502207 | L-LEUCYL-L-ALANINE                     | 7298-84-2                     |
| 01502217 | N-HISTIDYL-2-AMINONAPHTHALENE (betaNA) | 7424-15-9                     |
| 01502243 | RHAPONTIN                              | 155-58-8                      |
| 01503009 | BIOTIN                                 | 58-85-5                       |
| 01503069 | AMINOHIPPURIC ACID                     | 61-78-9, 94-16-6              |
| 01503102 | BACAMPICILLIN HYDROCHLORIDE            | 37661-08-8, 50972-17-3        |
| 01503142 | TENOXICAM                              | 59804-37-4                    |
| 01503230 | NIFENAZONE                             | 2139-47-1                     |
| 01503254 | 6alpha-METHYLPREDNISOLONE ACETATE      |                               |
| 01502193 | N-ACETYLASPARTYLGLUTAMIC ACID          | 3106-85-2                     |
| 01502208 | Tfa-VAL-TYR-VAL-OH                     | 64577-63-5                    |
| 01502219 | 1-BENZYLOXYCARBONYLAMINOPHENETHYL      | 26049-94-5                    |
| 01502245 | ELLAGIC ACID                           |                               |
| 01503036 | DINITOLMIDE                            |                               |
| 01503070 | MEFLOQUINE                             | 53230-10-7                    |
| 01503106 | BEPRIDIL HYDROCHLORIDE                 | 74764-40-2                    |
| 01503200 | CETRIMONIUM BROMIDE                    | 57-09-0, 6899-10-1            |
| 01503237 | HALCINONIDE                            | 3093-35-4                     |
| 01503273 | HYDROCORTISONE BUTYRATE                | 13609-67-1                    |
| 01502194 | Ng-METHYL-L-ARGININE ACETATE           |                               |
| 01502209 | PHENETHYL CAFFEATE (CAPE)              | 104594-70-9                   |
| 01502221 | PHENYLALANYLTYROSINE                   | 17355-18-9                    |
| 01502248 | GLUTATHIONE                            | 70-18-8                       |
| 01503038 | NICOTINYL TARTRATE                     | 100-55-0                      |
| 01503073 | ADIPHENINE HYDROCHLORIDE               | 50-42-0, 64-95-9 [adiphenine] |
| 01503110 | CARMUSTINE                             | 154-93-8                      |
| 01503202 | CHLOROXINE                             | 773-76-2                      |
| 01503239 | HYCANTHONE                             | 3105-97-3                     |
| 01503278 | MITOXANTHRONE HYDROCHLORIDE            | 70476-82-3, 65271-80-9        |
| 01502195 | PIRACETAM                              | 7491-74-9                     |
| 01502210 | VALYLTRYPTOPHAN                        | 24587-37-9                    |
| 01502223 | RESVERATROL                            |                               |
| 01502252 | MONOCROTALINE                          |                               |
| 01503041 | AMINOHYDROXYBUTYRIC ACID               |                               |
| 01503074 | ALEXIDINE HYDROCHLORIDE                | 22573-93-9, 22782-69-0        |
| 01503111 | CEFTRIAZONE SODIUM                     | 73384-59-5 [ceftriazone],     |
| 01503206 | CLOFOCTOL                              | 37693-01-9                    |
| 01503231 | NIMESULIDE                             | 51803-78-2                    |
| 01503304 | URETHANE                               |                               |
| 01502197 | PIPERIDOLATE HYDROCHLORIDE             | 129-77-1, 82-98-4             |
| 01502212 | GLYCYLLEUCYLPHENYLALANINE              |                               |
| 01502232 | CAMPTOTHECIN                           | 7689-03-4                     |
| 01502255 | SALICIN                                | 138-52-3                      |
| 01503042 | ARTEMISININ                            | 63968-64-9                    |
| 01503076 | QUINAPRIL HYDROCHLORIDE                | 82586-55-8, 85441-61-8        |
| 01503121 | TRAZODONE HYDROCHLORIDE                | 25332-39-2, 19794-93-5        |
| 01503244 | LASALOCID SODIUM                       | 25999-31-9                    |
| 01503250 | MEPHENTERMINE SULFATE                  | 1212-72-2, 6190-60-9          |
| 01503324 | THIOTEPA                               | 52-24-4                       |

Lee et al Supplemental Table 1

|          |                                               |                                |
|----------|-----------------------------------------------|--------------------------------|
| 01503341 | CHLOROACETOXYQUINOLINE                        |                                |
| 01503600 | NIMODIPINE                                    | 66085-59-4                     |
| 01503631 | 3,5-DINITROCATÉCHOL (OR-486)                  |                                |
| 01503676 | ESTRONE HEMISUCCINATE                         |                                |
| 01503902 | SODIUM beta-NICOTINAMIDE ADENINE DINUCLEOTIDE |                                |
| 01503935 | PROPAFENONE HYDROCHLORIDE                     | 34183-22-7, 54063-53-5         |
| 01503994 | CONVALLATOXIN                                 | 508-75-8                       |
| 01504070 | PHYSCION                                      | 521-61-9                       |
| 01504145 | GLICLAZIDE                                    | 21187-98-4                     |
| 01504181 | PRISTIMERIN                                   | 1258-84-0                      |
| 01503403 | EXALAMIDE                                     | 53370-90-4                     |
| 01503602 | SALINOMYCIN, SODIUM                           | 53003-10-4                     |
| 01503633 | N- (3-TRIFLUOROMETHYLPHENYL)PIPERAZINE        |                                |
| 01503679 | AZITHROMYCIN                                  | 83905-01-5, 117772-70-0        |
| 01503908 | PACLITAXEL                                    | 33069-62-4                     |
| 01503936 | PERICIAZINE                                   | 2622-26-6                      |
| 01504002 | BAICALEIN                                     | 491-67-8                       |
| 01504078 | SENNOSIDE A                                   |                                |
| 01504135 | TRIMEDLURE                                    |                                |
| 01504185 | TETRANDRINE                                   | 518-34-3                       |
| 01503412 | ETANIDAZOLE                                   | 22668-01-5                     |
| 01503603 | ACYCLOVIR                                     | 59277-89-3                     |
| 01503635 | 3-METHYL-1-PHENYL-2-PYRAZOLIN-5-ONE (MCI-186) |                                |
| 01503802 | AZADIRACHTIN                                  | 11141-17-6                     |
| 01503914 | BUTACAINE                                     | 149-15-5, 149-16-6 [butacaine] |
| 01503940 | SPERMIDINE TRIHYDROCHLORIDE                   |                                |
| 01504019 | GOSSYPOL                                      | 303-45-7                       |
| 01504098 | PHENOTHRIN                                    | 26002-80-2                     |
| 01504150 | MELOXICAM                                     | 71125-38-7                     |
| 01504200 | ISOLIQUIRITIGENIN                             | 961-29-5                       |
| 01503416 | MIZORIBINE                                    | 50924-49-7                     |
| 01503609 | NITRENDIPINE                                  | 84845-75-0                     |
| 01503637 | METHIOTHEPIN MALEATE                          |                                |
| 01503815 | CEVADINE                                      | 62-59-9                        |
| 01503922 | TRYPTAMINE                                    |                                |
| 01503977 | LOVASTATIN                                    | 75330-75-5                     |
| 01504021 | LUPININE                                      |                                |
| 01504099 | SILDENAFIL                                    | 139755-83-2                    |
| 01504151 | NIMUSTINE                                     | 42471-28-3                     |
| 01504205 | DELTALINE                                     |                                |
| 01503419 | NAFRONYL OXALATE                              | 3200-06-4, 31329-57-4          |
| 01503614 | CIPROFLOXACIN                                 | 85721-33-1                     |
| 01503639 | RAUWOLSCINE HYDROCHLORIDE                     |                                |
| 01503710 | CLOPIDOGREL SULFATE                           | 113665-84-2                    |
| 01503923 | IOPANIC ACID                                  | 96-83-3                        |
| 01503970 | METHOXYAMINE HYDROCHLORIDE                    |                                |
| 01504025 | SALSOLINE                                     |                                |
| 01504101 | TETRACHLOROISOPHTHALONITRILE                  |                                |
| 01504154 | PINOCEMBRIN                                   | 36052-37-6                     |
| 01504206 | BOVINOCIDIN (3-nitropropionic acid)           |                                |
| 01503422 | SEMUSTINE                                     | 13909-09-6                     |

Lee et al Supplemental Table 1

|          |                                                |                            |
|----------|------------------------------------------------|----------------------------|
| 01503620 | SAFROLE                                        | 94-59-7                    |
| 01503641 | 1-PHENYLBIGUANIDE HYDROCHLORIDE                |                            |
| 01503712 | LORATADINE                                     | 79794-75-5                 |
| 01503926 | LANSOPRAZOLE                                   | 103577-45-3                |
| 01503982 | AGMATINE SULFATE                               | 2482-00-0                  |
| 01504027 | CYTISINE                                       |                            |
| 01504104 | DIHYDROJASMONIC ACID                           | 98674-52-3                 |
| 01504171 | VENLAFAXINE                                    | 99300-78-4, 93413-69-5     |
| 01504210 | ATOVAQUONE                                     | 95233-18-4                 |
| 01503423 | SPIRAMYCIN                                     | 8025-81-8                  |
| 01503626 | OXOTREMORINE SESQUIFUMARATE                    |                            |
| 01503662 | VERATRIDINE                                    | 71-62-5                    |
| 01503720 | SELAMECTIN                                     | 165108-07-6                |
| 01503932 | OXYPHENCYCLIMINE HYDROCHLORIDE                 | 125-52-0, 125-53-1         |
| 01503973 | 2-THIOURACIL                                   |                            |
| 01504060 | EMODIC ACID                                    |                            |
| 01504105 | TANNIC ACID                                    | 1401-55-4                  |
| 01504174 | BUPROPION                                      | 31677-93-7, 34911-55-2     |
| 01504211 | CHLORGUANIDE HYDROCHLORIDE                     |                            |
| 01503500 | RESORCINOL MONOACETATE                         | 102-29-4                   |
| 01503627 | N-AMINOHEXYL-5-CHLORO-1-NAPHTHALENESULFONAMIDE |                            |
| 01503678 | CELECOXIB                                      |                            |
| 01503722 | ATORVASTATIN CALCIUM                           | 134523-03-8, 134523-00-5   |
| 01503933 | PENTOLINIUM TARTRATE                           | 52-62-0, 144-44-5          |
| 01503991 | CLEBOPRIDE MALEATE                             | 55905-53-8                 |
| 01504081 | BETULINIC ACID                                 | 472-15-1                   |
| 01504116 | FORMESTANE                                     | 566-48-3                   |
| 01504178 | TETRAHYDROPALMATINE                            | 3520-14-7                  |
| 01504212 | CHLORANIL                                      | 118-75-2                   |
| 01504213 | N-ACETYLASPARTIC ACID                          |                            |
| 01504232 | 2,3-DIHYDROXY-6,7-DICHLOROQUINOXALINE          |                            |
| 01504260 | LEVOFLOXACIN                                   | 138199-71-0                |
| 01504303 | MOXIFLOXACIN HYDROCHLORIDE                     |                            |
| 01505204 | ALMOTRIPTAN                                    | 154323-57-6                |
| 01505213 | ROSUVASTATIN                                   |                            |
| 01505245 | TROXERUTIN                                     | 7085-55-4                  |
| 01505255 | HUPERZINE A                                    | 102518-79-6                |
| 01505271 | CROTAMITON                                     | 483-63-6                   |
| 01505299 | AMITRAZ                                        | 33089-61-1                 |
| 01504215 | N,N-HEXAMETHYLENEAMILORIDE                     |                            |
| 01504235 | ROFECOXIB                                      |                            |
| 01504261 | CANDESARTAN CILEXTIL                           | 139481-59-7                |
| 01504401 | PIOGLITAZONE HYDROCHLORIDE                     | 111025-46-8 (pioglitazone) |
| 01505205 | OLMESARTAN MEDOXOMIL                           |                            |
| 01505215 | TEGASEROD MALEATE                              |                            |
| 01505247 | GINKGOLIC ACID                                 | 22910-60-7                 |
| 01505256 | SILYBIN                                        | 22888-70-6                 |
| 01505272 | BENZANTHRONE                                   | 82-05-3                    |
| 01505300 | PURPURIN                                       | 81-54-9                    |
| 01504216 | ZOXAZOLAMINE                                   | 61-80-3                    |
| 01504237 | HYDROQUINONE                                   | 123-31-9                   |

Lee et al Supplemental Table 1

|          |                                    |                              |
|----------|------------------------------------|------------------------------|
| 01504263 | ROSIGLITAZONE                      | 122320-73-4                  |
| 01504410 | PICROPODOPHYLLOTOXIN               | 477-47-4                     |
| 01505207 | CEFTIBUTEN                         | 97519-39-6                   |
| 01505222 | DERACOXIB                          | 169590-41-4                  |
| 01505248 | CANRENONE                          | 976-71-6                     |
| 01505257 | ICARIIN                            | 489-32-7                     |
| 01505281 | ZOLMITRIPTAN                       |                              |
| 01505302 | GENETICIN                          | 108321-42-2, 49863-47-       |
| 01504218 | ACRISORCIN                         | 7527-91-5                    |
| 01504243 | OXCARBAZEPINE                      | 28721-07-5                   |
| 01504268 | LOSARTAN                           | 124750-99-8, 114798-26-4     |
| 01504910 | DIHYDROJASMONIC ACID, METHYL ESTER | 24851-98-7                   |
| 01505208 | CEFDINIR                           | 91832-40-5                   |
| 01505230 | CILOSTAZOL                         | 73963-72-1                   |
| 01505249 | APRAMYCIN                          | 37321-09-8                   |
| 01505262 | SERTRALINE HYDROCHLORIDE           | 79559-97-0; 79617-96-2(base) |
| 01505293 | DIALLYL SULFIDE                    | 592-88-1                     |
| 01505304 | SECNIDAZOLE                        | 3366-95-8                    |
| 01504221 | PHENYLBUTYRATE SODIUM              | 90-27-7 (phenylbutyric acid) |
| 01504244 | BETAMIPRON                         | 3440-28-6                    |
| 01504272 | GATIFLOXACIN                       | 160738-57-8                  |
| 01505200 | BENZAEPRILOL HYDROCHLORIDE         | 86541-74-4                   |
| 01505209 | VALSARTAN SODIUM                   | 137862-53-4 (valsartan)      |
| 01505234 | AVOCADYNE                          | 34524-38-4                   |
| 01505250 | MADECASSIC ACID                    | 18449-41-7                   |
| 01505263 | ALFLUZOCIN                         |                              |
| 01505294 | CARBADOX                           | 6804-07-5                    |
| 01505305 | PEFLOXACINE MESYLATE               | 149676-40-4                  |
| 01504228 | CRUSTECDYSONE                      | 5289-74-7                    |
| 01504257 | CARVEDILOL TARTRATE                | 72956-09-3 (carvedilol)      |
| 01504273 | MIGLITOL                           | 72432-03-2                   |
| 01505201 | FAMCICLOVIR                        | 104227-87-4                  |
| 01505210 | SIBUTRAMINE HYDROCHLORIDE          | 84485-00-7; 106650-56-0      |
| 01505235 | AVOCADYNONE ACETATE                | 24607-10-1                   |
| 01505251 | IMIDACLOPRID                       | 13826-41-3                   |
| 01505264 | TRANDOLAPRIL                       | 87679-37-6                   |
| 01505296 | OXFENDAZOLE                        | 53716-50-0                   |
| 01505306 | ASPARTAME                          | 22839-47-0                   |
| 01504229 | METAXALONE                         | 1665-48-1                    |
| 01504258 | NATEGLINIDE                        | 105816-04-4                  |
| 01504300 | ORLISTAT                           | 96829-58-2                   |
| 01505202 | AMLODIPINE BESYLATE                | 111470-99-6                  |
| 01505211 | TORSEMIDE                          | 56211-40-6                   |
| 01505241 | SPARTEINE HYDROIODIDE              |                              |
| 01505252 | PALMATINE                          | 3486-67-7                    |
| 01505265 | TELITHROMYCIN                      |                              |
| 01505297 | PERILLYL ALCOHOL                   | 536-59-4, 18457-55-1         |
| 01505307 | TRIADIMEFON                        | 43121-43-3                   |
| 01504231 | CLARITHROMYCIN                     | 81103-11-9                   |
| 01504259 | IRBESARTAN                         | 138402-11-6                  |
| 01504302 | VALDECOXIB                         | 181695-72-7                  |

Lee et al Supplemental Table 1

|          |                                            |                            |
|----------|--------------------------------------------|----------------------------|
| 01505203 | EZETIMIBE                                  |                            |
| 01505212 | PERINDOPRIL ERBUMINE                       | 107133-36-8; 82834-16-0    |
| 01505244 | CITICOLINE                                 | 987-78-0                   |
| 01505253 | SINOMENINE                                 | 115-53-7                   |
| 01505267 | OXAPROZIN                                  | 21256-18-8                 |
| 01505298 | 3-ISOBUTYL-1-METHYLXANTHINE (IBMX)         | 28822-58-4                 |
| 01505308 | CHLOROPHYLLIDE Cu COMPLEX Na SALT          | 15611-43-5                 |
| 01505309 | BIFONAZOLE                                 | 60628-96-8                 |
| 01505320 | INDOLE-3-CARBINOL                          | 700-06-1                   |
| 01505331 | 3,3'-DIINDOLYLMETHANE                      | 1968-05-4                  |
| 01505342 | 7-NITROINDAZOLE                            | 2942-42-9                  |
| 01505803 | PRAVASTATIN SODIUM                         |                            |
| 01505276 | CAPSANTHIN                                 | 465-42-9                   |
| 02300094 | ASTEMIZOLE                                 | 68844-77-9                 |
| 02300229 | GLYBURIDE                                  | 10238-21-8                 |
| 00300038 | JUGLONE                                    | 481-39-0                   |
| 00300610 | ACETOSYRINGONE                             |                            |
| 01505311 | DIBENZOYLMETHANE                           | 120-46-7                   |
| 01505321 | RIFAXIMIN                                  | 80621-81-4                 |
| 01505332 | AZAPERONE                                  | 1649-18-9                  |
| 01505347 | RIBOFLAVIN                                 | 83-88-5                    |
| 01505810 | PEONIFLORIN                                | 23180-57-6                 |
| 01800067 | COLCHICEINE                                | 477-27-0                   |
| 02300147 | N-ACETYLNEURAMIC ACID                      |                            |
| 02300259 | NICOTINE DITARTRATE                        |                            |
| 00300047 | ANISODAMINE                                |                            |
| 00201580 | POMIFERIN                                  |                            |
| 01505312 | TYLOSIN TARTRATE                           | 1405-54-5, 1401-69-0(base) |
| 01505322 | CEPHARANTHINE                              | 481-49-2                   |
| 01505333 | TRANILAST                                  | 53902-12-8                 |
| 01505345 | CURCUMIN                                   | 458-37-7                   |
| 01505815 | N-CHLOROETHYL-N-ETHYL-2'-METHYLBENZYLAMINE |                            |
| 01800166 | KOJIC ACID                                 |                            |
| 02300309 | VESAMICOL HYDROCHLORIDE                    | 120447-62-3                |
| 02300329 | 1-METHYLXANTHINE                           |                            |
| 00300146 | VULPINIC ACID                              |                            |
| 00201664 | CELASTROL                                  | 34157-83-0                 |
| 01505314 | SARAFLOXACIN HYDROCHLORIDE                 | 91296-87-6                 |
| 01505323 | CARBIMAZOLE                                | 22232-54-8                 |
| 01505334 | SECURININE                                 | 5610-40-2                  |
| 01505348 | RILUZOLE                                   | 1744-22-5                  |
| 01505816 | PREGABALIN                                 | 148553-50-8                |
| 02300204 | ISOBUTYLMETHYLXANTHINE                     |                            |
| 02300296 | MEXAMINE                                   | 608-07-1                   |
| 02300345 | NIPECOTIC ACID                             |                            |
| 00300147 | USNIC ACID                                 | 125-46-2                   |
| 00201138 | DEGUELIN(-)                                | 522-17-8                   |
| 01505315 | 6-AMINONICOTINAMIDE                        | 329-89-5                   |
| 01505327 | CHLORMADINONE ACETATE                      |                            |
| 01505336 | VALERYL SALYCILATE                         | 64206-54-8                 |
| 01505360 | CEFDITORIN PIVOXIL                         | 117467-28-4                |



Lee et al Supplemental Table 1

|          |                                                  |                                |
|----------|--------------------------------------------------|--------------------------------|
| 01600716 | 2,6-DI-t-BUTYL-4-METHYLPHENOL                    | 128-37-0                       |
| 02300192 | DESMETHYLDIHYDROCAPSAICIN                        |                                |
| 02300100 | HYDROXYTACRINE MALEATE                           |                                |
| 02300347 | PENTETRAZOLE                                     |                                |
| 00300547 | PHLORIDZIN                                       | 60-81-1                        |
| 00201606 | RUTILANTINONE                                    | 21288-61-9                     |
| 01505316 | PROTHIONAMIDE                                    | 14222-60-7                     |
| 01505328 | 4'-DEMETHYLEPIPODOPHYLLOTOXIN                    |                                |
| 01505337 | ELAIDYLPHOSPHOCHOLINE                            |                                |
| 01505361 | MODAFINIL                                        | 68693-11-8                     |
| 01600654 | CHAULMOSULFONE                                   | 473-32-5                       |
| 02300228 | KAINIC ACID                                      | 487-79-6                       |
| 02300104 | 9-AMINO-1,2,3,4-TETRAHYDROACRIDINE HYDROCHLORIDE |                                |
| 02300348 | 1- (2-METHOXYPHENYL)PIERAZINE HYDROCHLORIDE      |                                |
| 00300548 | SPARTEINE SULFATE                                | 6160-12-9, 299-39-8            |
| 00200013 | ROTENONE                                         | 83-79-4                        |
| 01505317 | CARMOFUR                                         | 61422-45-5                     |
| 01505329 | MILTEFOSINE                                      | 58066-85-6                     |
| 01505339 | L-PHENYLALANINOL                                 | 3182-95-4                      |
| 01505801 | TOPIRAMATE                                       |                                |
| 01600300 | CREATININE                                       | 60-27-5                        |
| 02300332 | PODOFILOX                                        | 518-28-5                       |
| 02300137 | N-HYDROXYMETHYLNICOTINAMIDE                      | 3569-99-1                      |
| 00300024 | HYDROCORTISONE                                   | 50-23-7                        |
| 00300534 | ISORESERPINE                                     |                                |
| 00200007 | GAMBOGIC ACID                                    | 2752-65-0                      |
| 01505319 | CLOPIDOL                                         | 2971-90-6                      |
| 01505330 | OXICONAZOLE NITRATE                              | 64211-46-7                     |
| 01505340 | AZELASTINE HYDROCHLORIDE                         | 58581-89-8                     |
| 01505802 | GEMIFLOXACIN MESYLATE                            |                                |
| 01601021 | PAEONOL                                          | 552-41-0                       |
| 02300219 | EDROPHONIUM CHLORIDE                             | 116-38-1, 312-48-1             |
| 02300205 | LEVODOPA                                         | 59-92-7                        |
| 00300013 | PIMPINELLIN                                      | 131-12-4                       |
| 00300546 | BERGAPTEN                                        | 484-20-8                       |
| 00200022 | AKLAVINE HYDROCHLORIDE                           | 60504-57-6 (aklavine)          |
| 01500564 | TETRACAINE HYDROCHLORIDE                         | 136-47-0, 94-24-6 [tetracaine] |
| 01500408 | METHYLTHIOURACIL                                 | 56-04-2                        |
| 01500549 | SULFAMETHIZOLE                                   | 144-82-1                       |
| 01500762 | ROSOLIC ACID                                     |                                |
| 01501135 | NICARDIPINE HYDROCHLORIDE                        | 54527-84-3, 55985-32-5         |
| 01501172 | AZOBENZENE                                       | 103-33-3                       |
| 01500567 | TETRAHYDROZOLINE HYDROCHLORIDE                   | 522-48-5, 84-22-0              |
| 01500455 | OXYPHENBUTAZONE                                  | 7081-38-1, 129-20-4            |
| 01500554 | SULFINPYRAZONE                                   | 57-96-5                        |
| 01500665 | ACEBUTOLOL HYDROCHLORIDE                         | 34381-68-5, 37517-30-9         |
| 01500993 | FLUNARIZINE HYDROCHLORIDE                        | 30484-77-6, 52468-60-7         |
| 01501148 | SULCONAZOLE NITRATE                              | 61318-91-0, 61318-90-9         |
| 01501175 | FLURANDRENOLIDE                                  | 1524-88-5                      |
| 01501214 | ENALAPRIL MALEATE                                | 76095-16-4, 75847-73-3         |
| 01500575 | THIORIDAZINE HYDROCHLORIDE                       | 130-61-0, 50-52-2              |

Lee et al Supplemental Table 1

|          |                                                |                                 |
|----------|------------------------------------------------|---------------------------------|
| 01500515 | PROPYLTHIOURACIL                               | 51-52-5                         |
| 01500555 | SULFISOXAZOLE                                  | 127-69-5                        |
| 01500690 | MELATONIN                                      |                                 |
| 01500995 | FLUTAMIDE                                      | 13311-84-7                      |
| 01501149 | RITODRINE HYDROCHLORIDE                        | 23239-51-2, 26652-09-5          |
| 01501180 | ESTRADIOL DIACETATE                            | 34334-88-6                      |
| 01502040 | CEFMETAZOLE SODIUM                             | 56796-39-5                      |
| 01500576 | THIOTHIXENE                                    | 5591-45-7, 3313-26-6 [//Z//]    |
| 01500518 | PYRAZINAMIDE                                   | 98-96-4                         |
| 01500621 | AMINOPHENAZONE                                 | 83-07-8, 747-30-8               |
| 01500702 | ACETYLTRYPTOPHAN                               |                                 |
| 01500779 | SUPROFEN METHYL ESTER                          |                                 |
| 01500996 | GLAFENINE                                      | 3820-67-5                       |
| 01501150 | SULPIRIDE                                      | 15676-16-1                      |
| 01501185 | ECONAZOLE NITRATE                              | 68797-31-9, 27220-47-9          |
| 01502042 | CEFOPERAZONE SODIUM                            | 62893-20-3, 62893-19-0          |
| 01500580 | TOLAZOLINE HYDROCHLORIDE                       | 59-97-2, 59-98-3 [tolazoline]   |
| 01500521 | PYRVINIUM PAMOATE                              | 3546-41-6                       |
| 01500647 | VINCAMINE                                      |                                 |
| 01500703 | ACETYLGLUTAMIC ACID                            |                                 |
| 01500810 | AMINACRINE                                     | 90-45-9, 134-50-9 [aminacrine]  |
| 01501000 | ETHAVERINE HYDROCHLORIDE                       | 985-13-7, 486-47-5              |
| 01501152 | SPIPERONE                                      |                                 |
| 01501187 | FLUNISOLIDE                                    |                                 |
| 01502035 | NARASIN                                        | 55134-13-9                      |
| 01500582 | TOLMETIN SODIUM                                | 64490-92-2, 26171-23-3          |
| 01500532 | SALICYLAMIDE                                   | 65-45-2                         |
| 01500678 | gamma-AMINOBUTYRIC ACID                        | 56-12-2                         |
| 01500715 | ACETYLGLUCOSAMINE                              |                                 |
| 01501002 | DROPERIDOL                                     | 548-73-2                        |
| 01501155 | SULFAMETER                                     | 651-06-9                        |
| 01501188 | EBSELEN                                        | 60940-34-3                      |
| 01502060 | SNAP (S-NITROSO-N-ACETYLPENICILLAMINE)         |                                 |
| 01500586 | TRIAMCINOLONE                                  | 124-94-7                        |
| 01500544 | SULFABENZAMIDE                                 | 127-71-9                        |
| 01500759 | QUINALIZARIN                                   |                                 |
| 01500813 | BUDESONIDE                                     | 51333-22-3 [11(gr b), 16(gr a)] |
| 01501015 | FLUFENAMIC ACID                                | 530-78-9                        |
| 01501156 | SULFAMETHOXYPYRIDAZINE                         | 80-35-3                         |
| 01501195 | FUREGRELATE SODIUM                             | 87463-91-0, 85666-24-6          |
| 01502070 | 6,7-DICHLORO-3-HYDROXY-2-QUINOXALINECARBOXYLIC |                                 |
| 01500294 | CINEOLE                                        |                                 |
| 01500266 | DOXYCYCLINE HYDROCHLORIDE                      | 17086-28-1, 564-25-0            |
| 01500655 | ACONITINE                                      | 302-27-2                        |
| 01500861 | CORALYNE CHLORIDE                              | 38989-38-7                      |
| 01503904 | PATULIN                                        | 149-29-1                        |
| 01501171 | SACCHARIN                                      | 81-07-2                         |
| 01501200 | XYLAZINE                                       | 23076-35-9, 7361-61-7           |
| 01502089 | ACETYLCARNITINE                                |                                 |
| 01502092 | 5-FLUOROINDOLE-2-CARBOXYLIC ACID               | 399-76-8                        |
| 01502213 | TARGININE HYDROCHLORIDE                        | 156706-47-7, 17035-90-          |

Lee et al Supplemental Table 1

|          |                                                |                              |
|----------|------------------------------------------------|------------------------------|
| 01503086 | TIAPRIDE HYDROCHLORIDE                         | 51012-32-9                   |
| 01503205 | CITIOLONE                                      | 1195-16-0                    |
| 01503252 | METHAZOLAMIDE                                  | 554-57-4                     |
| 01503297 | HEXAMETHONIUM BROMIDE                          | 55-97-0, 60-26-4             |
| 01503822 | RAMIFENAZONE                                   | 3615-24-5                    |
| 01503934 | PERPHENAZINE                                   | 58-39-9                      |
| 01504088 | ETHYLNOREPINEPHRINE HYDROCHLORIDE              | 3198-07-0, 536-24-3          |
| 01502094 | ROSMARINIC ACID                                | 537-15-5                     |
| 01502244 | AMYGDALIN                                      | 29883-15-6                   |
| 01503101 | AZLOCILLIN SODIUM                              | 37091-66-0                   |
| 01503207 | CYCLOBENZAPRINE HYDROCHLORIDE                  | 6202-23-9, 303-53-7          |
| 01503253 | METHYLBENZETHONIUM CHLORIDE                    | 1320-44-1, 25155-18-4        |
| 01503298 | DIPYRONE                                       | 5907-38-0, 68-89-3           |
| 01503647 | 2- (2,6-DIMETHOXYPHENOXYETHYL)AMINOMETHYL-1,4- |                              |
| 01503913 | NIGERICIN SODIUM                               | 28380-24-7                   |
| 01503941 | THIOCTIC ACID                                  | 62-46-4                      |
| 01504094 | TENIPOSIDE                                     | 29767-20-2                   |
| 01502107 | CISPLATIN                                      | 15663-27-1                   |
| 01503104 | BENDROFUMETHIAZIDE                             | 73-48-3                      |
| 01503215 | ENOXACIN                                       | 74011-58-8                   |
| 01503257 | MIDODRINE HYDROCHLORIDE                        | 3092-17-9, 42794-76-3        |
| 01503650 | NABUMETONE                                     | 42924-53-8                   |
| 01503918 | CLOBETASOL PROPIONATE                          | 25122-46-7, 25122-41-2       |
| 01503947 | CACODYLIC ACID                                 | 75-60-5                      |
| 01504144 | DIRITHROMYCIN                                  | 62013-04-1                   |
| 01502109 | ZIDOVUDINE [AZT]                               | 30516-87-1                   |
| 01503014 | AKLOMIDE                                       | 3011-89-0                    |
| 01503107 | BROMHEXINE HYDROCHLORIDE                       | 611-75-6, 3572-43-8          |
| 01503221 | ETHISTERONE                                    | 434-03-7                     |
| 01503260 | NADOLOL                                        | 42200-33-9                   |
| 01503391 | D-PHENYLALANINE                                | 673-06-3                     |
| 01503675 | ANDROSTERONE SODIUM SULFATE                    |                              |
| 01503920 | CLOPERASTINE HYDROCHLORIDE                     | 3703-76-2                    |
| 01503954 | TULOButEROL                                    | 41570-61-0                   |
| 01504148 | MEPIVACAINE HYDROCHLORIDE                      | 1722-62-9, 96-88-8           |
| 01502155 | N (g)-NITRO-L-ARGININE                         | 2149-70-4                    |
| 01503043 | BUCLADESINE                                    | 362-74-3                     |
| 01503108 | BROMOPRIDE                                     | 4093-35-0                    |
| 01503222 | FIPEXIDE HYDROCHLORIDE                         | 34161-24-5                   |
| 01503262 | NALTREXONE HYDROCHLORIDE                       | 16676-29-2, 16590-41-3       |
| 01503604 | RETINYL PALMITATE                              |                              |
| 01503801 | NAPROXOL                                       | 26159-36-4                   |
| 01503921 | CYPROTERONE                                    | 2098-66-0                    |
| 01503978 | HYDROXYCHLOROQUINE SULFATE                     | 747-36-4, 118-42-3           |
| 01504152 | NILUTAMIDE                                     | 63612-50-0                   |
| 01502162 | p-CHLOROPHENYLALANINE                          | 7424-00-2(dl); 14173-39-8(l) |
| 01503077 | PRIDINOL METHANESULFONATE                      | 511-45-5                     |
| 01503115 | VINPOCETINE                                    | 42971-09-5                   |
| 01503227 | PERHEXILINE MALEATE                            | 6724-53-4, 6621-47-2         |
| 01503267 | NOMIFENSIN MALEATE                             | 32795-47-4, 24526-64-5       |
| 01503610 | BENZALKONIUM CHLORIDE                          | 8001-54-5                    |

Lee et al Supplemental Table 1

|          |                                               |                               |
|----------|-----------------------------------------------|-------------------------------|
| 01503816 | AMCINONIDE                                    | 51022-69-6                    |
| 01503925 | KETOROLAC TROMETHAMINE                        | 74103-07-4, 74103-06-3        |
| 01503985 | BROMPHENIRAMINE MALEATE                       | 980-71-2, 86-22-6             |
| 01502182 | d[-Arg-2]KYOTORPHAN ACETATE                   |                               |
| 01503083 | AMIPRILOSE                                    | 56824-20-5, 60414-06-4        |
| 01503117 | TRIMIPRAMINE MALEATE                          | 521-78-8, 739-71-9            |
| 01503229 | METHAPYRILENE HYDROCHLORIDE                   | 135-23-9, 91-80-5             |
| 01504153 | NORCANTHARIDIN                                |                               |
| 01503270 | PRILOCAINE HYDROCHLORIDE                      | 1786-81-8, 721-50-6           |
| 01503611 | PENTOXIFYLLINE                                | 6493-05-6                     |
| 01503818 | BUPIVACAINE HYDROCHLORIDE                     | 14252-80-3, 2180-92-9         |
| 01503927 | LEFUNAMIDE                                    |                               |
| 01502196 | ETHOSUXIMIDE                                  | 77-67-8                       |
| 01503085 | PYRITHYLDIONE                                 | 77-04-3                       |
| 01503204 | CINNARAZINE                                   | 298-57-7                      |
| 01503251 | METARAMINOL BITARTRATE                        |                               |
| 01503276 | ROXITHROMYCIN                                 | 80214-83-1                    |
| 01503628 | PRONETALOL HYDROCHLORIDE                      | 54-80-8                       |
| 01503821 | CYSTAMINE DIHYDROCHLORIDE                     | 56-17-7                       |
| 01503931 | MORANTEL CITRATE                              | 26155-31-7, 20574-50-9        |
| 01504190 | AVOBENZONE                                    | 70356-09-1                    |
| 01502112 | CYCLOHEXIMIDE                                 | 66-81-9                       |
| 02300325 | METOLAZONE                                    | 17560-51-9                    |
| 02300061 | CLOMIPRAMINE HYDROCHLORIDE                    | 17321-77-6, 303-49-1          |
| 01504209 | DIPLOSALSALATE                                |                               |
| 01502002 | ACIVICIN                                      | 42228-92-2                    |
| 01501176 | ERYTHROMYCIN ESTOLATE                         | 134-36-1, 114-07-8            |
| 02300253 | 1R,2S-PHENYLPROPYLAMINE                       |                               |
| 02300062 | CHLORMEZANONE                                 | 80-77-3                       |
| 01504223 | FENBUTYRAMIDE                                 |                               |
| 01503906 | ANISOMYCIN                                    |                               |
| 01501144 | SULFADIMETHOXINE                              | 122-11-2                      |
| 02300214 | DILTIAZEM HYDROCHLORIDE                       | 33286-22-5, 42399-41-7        |
| 02300063 | 1,3-DIPROPYL-8-CYCLOPENTYLXANTHINE [DPCPX]    |                               |
| 01504173 | FLUOXETINE                                    | 54910-89-3                    |
| 01504225 | 2-MERCAPTOBENZOTHAZOLE                        | 149-30-4                      |
| 01500519 | PYRILAMINE MALEATE                            | 59-33-6, 91-84-9 [pyrilamine] |
| 01501146 | SULFAGUANIDINE                                | 57-67-0                       |
| 02300170 | PARAXANTHINE                                  |                               |
| 02300078 | ETHYL 1-BENZYL-3-HYDROXY- 2-OXO[5H]PYRROLE-4- |                               |
| 01504226 | MERCAPTAMINE HYDROCHLORIDE                    | 60-23-1                       |
| 02300242 | LOXAPINE SUCCINATE                            | 27833-64-3, 1977-10-2         |
| 01502028 | CEPHALEXIN                                    | 23325-78-2, 15686-71-2        |
| 02300206 | DIAZOXIDE                                     | 364-98-7                      |
| 00300565 | METERGOLINE                                   | 17692-51-2                    |
| 01504182 | 3-METHYLXANTHINE                              |                               |
| 01504739 | beta-PELTATIN                                 | 518-29-6                      |
| 02300241 | LOPERAMIDE HYDROCHLORIDE                      | 34552-83-5, 53179-11-6        |
| 02300193 | 8-CYCLOPENTYLTHEOPHYLLINE                     |                               |
| 02300161 | AMOXEPINE                                     | 14028-44-5                    |
| 01504184 | AMINOLEVULINIC ACID HYDROCHLORIDE             |                               |

Lee et al Supplemental Table 1

|          |                                 |                                |
|----------|---------------------------------|--------------------------------|
| 01504800 | CHRYSANTHEMIC ACID              | 10453-89-1                     |
| 00100032 | GEDUNIN                         | 2753-30-2                      |
| 01501103 | MEFENAMIC ACID                  | 61-68-7                        |
| 02300307 | VERAPAMIL HYDROCHLORIDE         | 152-11-4, 52-53-9 [verapamil]  |
| 02300165 | AMIODARONE HYDROCHLORIDE        | 1951-25-3                      |
| 01601020 | DEET                            |                                |
| 01504187 | TELENZEPINE HYDROCHLORIDE       | 80880-90-6                     |
| 01505270 | PROPRANOLOL HYDROCHLORIDE (+/-) | 3506-09-0                      |
| 01501201 | TOLAZAMIDE                      | 1156-19-0                      |
| 01501142 | SULFACHLORPYRIDAZINE            | 80-32-0                        |
| 02300176 | PHENOXYBENZAMINE HYDROCHLORIDE  | 63-92-3, 59-96-1               |
| 01503804 | COLFORSIN                       | 66575-29-9                     |
| 01500391 | METHACHOLINE CHLORIDE           | 62-51-1, 55-92-5               |
| 01500483 | PHENYLEPHRINE HYDROCHLORIDE     | 61-76-7, 59-42-7               |
| 01500501 | PRIMIDONE                       | 125-33-7                       |
| 01500104 | ACETYLCHOLINE                   | 60-31-1, 51-84-3               |
| 01500273 | EPHEDRINE (1R,2S) HYDROCHLORIDE | 50-98-6 [((-)-)ephedrine,      |
| 01500395 | METHICILLIN SODIUM              | 7246-14-2, 132-92-3            |
| 01500488 | PINDOLOL                        |                                |
| 01500502 | PROBENECID                      | 57-66-9                        |
| 00310028 | QUASSIN                         | 76-78-8                        |
| 01502084 | PROADIFEN HYDROCHLORIDE         | 78997-40-7                     |
| 01500276 | ERGOCALCIFEROL                  | 50-14-6                        |
| 01500399 | METHOXAMINE HYDROCHLORIDE       | 61-16-5, 390-28-3              |
| 01500489 | PIPERACILLIN SODIUM             | 59703-84-3, 66258-76-2         |
| 01500503 | PROCAINAMIDE HYDROCHLORIDE      | 614-39-1, 51-06-9              |
| 01500130 | ASPIRIN                         | 50-78-2                        |
| 01500300 | FLUMETHAZONE PIVALATE           | 2002-29-1, 2135-17-3           |
| 01500404 | METHYLERGONOVINE MALEATE        | 57432-61-8, 7054-07-1          |
| 01500491 | PIROXICAM                       | 36322-90-4                     |
| 01500507 | PROCYCLIDINE HYDROCHLORIDE      | 1508-76-5, 77-37-2             |
| 00210186 | CITRININ                        | 518-75-2                       |
| 00310040 | alpha-TOCHOPHERYL ACETATE       |                                |
| 01500168 | CEPHRADINE                      | 38821-53-3 [anhydrous],        |
| 01500304 | FLUOROMETHOLONE                 | 426-13-1                       |
| 01500406 | METHYLPREDNISOLONE              | 83-43-2                        |
| 01500450 | OXIDOPAMINE HYDROCHLORIDE       | 1199-18-4                      |
| 01500508 | PROGESTERONE                    | 57-83-0                        |
| 01500244 | DIETHYLSTILBESTROL              | 56-53-1                        |
| 01500339 | HYDROCORTISONE HEMISUCCINATE    | 83784-20-7, 2203-97-6          |
| 01500496 | PREDNISOLONE                    | 50-24-8 [anhydrous], 52438-85- |
| 00200846 | APIGENIN                        | 520-36-5                       |
| 01501021 | FENSPIRIDE HYDROCHLORIDE        | 5053-08-7, 5053-06-5           |
| 01500253 | DIMETHADIONE                    | 695-53-4                       |
| 01500354 | IPRATROPIUM BROMIDE             | 66985-17-9, 22254-24-6         |
| 01500467 | PENICILLIN V POTASSIUM          | 132-98-9, 87-08-1 [penicillin, |
| 01500497 | PREDNISOLONE ACETATE            | 52-21-1                        |
| 01500557 | TAMOXIFEN CITRATE               | 54965-24-1, 10540-29-1         |
| 00310300 | VERATRINE SULFATE               | 62-59-9                        |
| 01500264 | DOXEPIN HYDROCHLORIDE           | 1229-29-4, 1668-19-5           |
| 01500363 | LACTULOSE                       | 4618-18-2                      |

Lee et al Supplemental Table 1

|          |                              |                                |
|----------|------------------------------|--------------------------------|
| 00200046 | GRISEOFULVIN                 | 126-07-8                       |
| 01500499 | PREDNISONE                   | 53-03-2                        |
| 01500558 | TERBUTALINE HEMISULFATE      | 23031-32-5, 23031-25-6         |
| 01500478 | PHENIRAMINE MALEATE          | 132-20-7, 86-21-5              |
| 01500525 | RACEPHEDRINE HYDROCHLORIDE   | 134-71-4, 90-81-3              |
| 00300029 | DESOXYCORTICOSTERONE ACETATE | 56-47-3                        |
| 01500126 | ANTAZOLINE PHOSPHATE         | 154-68-7, 91-75-8 [antazoline] |
| 01500267 | DOXYLAMINE SUCCINATE         | 562-10-7, 469-21-6             |
| 01501113 | PERUVOSIDE                   | 1182-67-2                      |
| 01503223 | PARAROSANILINE PAMOATE       | 7232-51-1, 569-61-9            |
| 01502254 | MENADIONE                    | 58-27-5                        |
| 01503017 | AMINOTHIAZOLE                | 96-50-4                        |
| 01500756 | NALIDIXIC ACID               | 389-08-2, 3374-05-8            |
| 01503648 | GABOXADOL HYDROCHLORIDE      | 64603-91-4                     |
| 01500230 | DEXAMETHASONE                | 50-02-2                        |
| 01500200 | CLOTRIMAZOLE                 | 23593-75-1                     |
| 01504079 | TOMATINE                     | 86273-92-9                     |
| 01503051 | RETINYL ACETATE              |                                |
| 01500295 | EUCATROPINE HYDROCHLORIDE    | 536-93-6, 100-91-4             |
| 02300270 | PINACIDIL                    | 85371-64-8, 60560-33-0         |
| 01504136 | ALAPROCLATE                  | 60719-82-6                     |

Lee et al Supplemental Table 1

| plate  | position | FORMULA       | MolWt    | BIOACTIVITY                                                |
|--------|----------|---------------|----------|------------------------------------------------------------|
| 206001 | A02      | C20H23ClN2O5  | 406.8697 | antihistaminic                                             |
| 206001 | A03      | C22H47N5O21S2 | 781.7688 | antibacterial                                              |
| 206001 | A04      | C21H38ClN     | 339.9967 | antiinfective (topical)                                    |
| 206001 | A05      | C9H7N7O2S     | 277.2658 | immunosuppressant, antineoplastic, antirheumatic           |
| 206001 | A06      | C40H56        | 536.8923 | provitamin A                                               |
| 206001 | A07      | C14H11ClN2O4S | 338.7718 | diuretic, antihypertensive                                 |
| 206001 | A08      | C16H16N5NaO7S | 477.453  | antibacterial                                              |
| 206001 | A09      | C7H6ClN3O4S2  | 295.7246 | diuretic, antihypertensive                                 |
| 206001 | A10      | C7H4ClNO2     | 169.5684 | muscle relaxant (skeletal)                                 |
| 206001 | A11      | C7H17ClN2O2   | 196.6787 | cholinergic                                                |
| 206001 | B02      | C4H6N4O3S2    | 222.2454 | carbonic anhydrase inhibitor, diuretic, antiglaucoma       |
| 206001 | B03      | C6H9Cl2N7O    | 266.0909 | Na <sup>+</sup> channel inhibitor, diuretic                |
| 206001 | B04      | C47H73NO17    | 924.1024 | antifungal                                                 |
| 206001 | B05      | C66H103N17O16 | 1422.725 | antibacterial                                              |
| 206001 | B06      | C22H29FO5     | 392.4718 | glucocorticoid, antiinflammatory                           |
| 206001 | B07      | C6H15ClN2O2   | 182.6517 | cholinergic, miotic                                        |
| 206001 | B08      | C16H15N2NaO6S | 418.4256 | antibacterial                                              |
| 206001 | B09      | C8H9ClO       | 156.6133 | antibacterial, topical and urinary antiseptic              |
| 206001 | B10      | C14H24N2O3    | 268.359  | antifungal                                                 |
| 206001 | B11      | C19H17ClN3NaO | 457.8712 | antibacterial                                              |
| 206001 | C02      | C2H5NO2       | 75.06765 | urease inhibitor, antiurolithic, antibacterial             |
| 206001 | C03      | C7H6KNO2      | 175.2334 | ultraviolet screen                                         |
| 206001 | C04      | C16H18N3NaO4S | 371.3934 | antibacterial                                              |
| 206001 | C05      | C10H12ClNO2   | 213.6656 | muscle relaxant (skeletal)                                 |
| 206001 | C06      | C9H10Cl3N3    | 266.5592 | antihypertensive                                           |
| 206001 | C07      | C15H12N2O     | 236.2757 | analgesic, anticonvulsant                                  |
| 206001 | C08      | C17H16N3NaO6S | 445.4514 | antibacterial                                              |
| 206001 | C09      | C23H21ClO3    | 380.875  | estrogen                                                   |
| 206001 | C10      | C12H10N2O5    | 262.2239 | antibacterial                                              |
| 206001 | C11      | C9H6ClNO      | 179.6073 | antibacterial, antifungal                                  |
| 206001 | D02      | C16H19N3O5S   | 365.4109 | antibacterial                                              |
| 206001 | D03      | C6H13NO2      | 131.176  | hemostatic                                                 |
| 206001 | D04      | C14H20Cl2N4   | 315.2483 | coccidiostat                                               |
| 206001 | D05      | C10H16ClN3O5  | 293.7091 | decarboxylase inhibitor                                    |
| 206001 | D06      | C22H19NO4     | 361.401  | cathartic                                                  |
| 206001 | D07      | C17H16N2Na2O6 | 422.3705 | antibacterial                                              |
| 206001 | D08      | C5H9NO3S      | 163.1964 | mucoytic                                                   |
| 206001 | D09      | C20H23ClN2O4  | 390.8703 | antihistaminic                                             |
| 206001 | D10      | C25H30ClNO5   | 459.9746 | antihistaminic                                             |
| 206001 | D11      | C22H25NO6     | 399.4477 | antimitotic, antigout agent                                |
| 206001 | E02      | C10H13N5O4    | 267.2462 | antiarrhythmic, cardiac depressant                         |
| 206001 | E03      | C13H16N2O2    | 232.2847 | aromatase inhibitor, antineoplastic, testosterone          |
| 206001 | E04      | C8H9NO2       | 151.1664 | analgesic, antipyretic                                     |
| 206001 | E05      | C27H42ClNO2   | 448.0943 | antiinfective (topical)                                    |
| 206001 | E06      | C12H4Cl4Na2O2 | 400.0201 | anthelmintic, antiseptic                                   |
| 206001 | E07      | C14H10O3      | 226.234  | antipsoriatic                                              |
| 206001 | E08      | C15H16Cl2N2O8 | 423.2094 | antibacterial, antirickettsial, inhibits protein synthesis |
| 206001 | E09      | C17H19ClN2S   | 318.8714 | antiemetic, antipsychotic                                  |
| 206001 | E10      | C22H26BrNO3   | 432.3614 | anticholinergic                                            |
| 206001 | E11      | C57H103N16Na5 | 1735.816 | antibacterial                                              |

Lee et al Supplemental Table 1

|        |     |               |          |                                                            |
|--------|-----|---------------|----------|------------------------------------------------------------|
| 206001 | F02 | C10H12N2O     | 176.2199 | antidepressant                                             |
| 206001 | F03 | C7H7NO3       | 153.1387 | antibacterial, tuberculostatic                             |
| 206001 | F04 | C11H12N2O     | 188.2311 | analgesic                                                  |
| 206001 | F05 | C9H11NO2      | 165.1935 | anesthetic (topical)                                       |
| 206001 | F06 | C6H14O6S2     | 246.3029 | antineoplastic, alkylating agent                           |
| 206001 | F07 | C12H24N2O4    | 260.3361 | muscle relaxant (skeletal)                                 |
| 206001 | F08 | C11H12Cl2N2O5 | 323.1347 | antibacterial, antirickettsial, inhibits protein synthesis |
| 206001 | F09 | C10H13ClN2O3S | 276.7437 | antidiabetic                                               |
| 206001 | F10 | C18H34Cl2N2O5 | 461.4521 | antibacterial, inhibits protein synthesis                  |
| 206001 | F11 | C5H4N4O       | 136.1138 | antihyperuricemia, antigout, antiurolithic                 |
| 206001 | G02 | C27H37NO6     | 471.599  | anticholinergic                                            |
| 206001 | G03 | C20H24ClN     | 313.874  | antidepressant                                             |
| 206001 | G04 | C17H18ClNO2   | 303.7915 | emetic                                                     |
| 206001 | G05 | C15H14ClN3O4S | 431.9415 | diuretic, antihypertensive                                 |
| 206001 | G06 | C8H10N4O2     | 194.1945 | CNS stimulant                                              |
| 206001 | G07 | C16H17N3O5S   | 363.395  | antibacterial                                              |
| 206001 | G08 | C7H7ClO       | 142.5862 | antiinfectant                                              |
| 206001 | G09 | C22H24Cl2N2O8 | 515.3512 | antibacterial, antiamebic, Ca chelator, hepatotoxic;       |
| 206001 | G10 | C10H11ClO3    | 214.6504 | antihyperlipoproteinemic                                   |
| 206001 | G11 | C23H30O6      | 402.492  | glucocorticoid                                             |
| 206001 | H02 | C10H18ClN     | 187.7147 | antiviral, antiparkinsonian; treatment of drug-induced     |
| 206001 | H03 | C20H24Cl3N3O  | 428.7928 | antimalarial                                               |
| 206001 | H04 | C17H25NO7S    | 387.4553 | anticholinergic, mydriatic                                 |
| 206001 | H05 | C21H27NO5S    | 405.517  | anticholinergic                                            |
| 206001 | H06 | C10H16O       | 152.2384 | analgesic, antiinfective, antipruritic                     |
| 206001 | H07 | C14H13N8NaO4S | 476.4927 | antibacterial                                              |
| 206001 | H08 | C18H32ClN3O8P | 515.8716 | antimalarial, antiamebic, antirheumatic, intercalating     |
| 206001 | H09 | C25H46N14O12S | 766.796  | antibacterial, tuberculostatic                             |
| 206001 | H10 | C32H36ClNO8   | 598.0986 | gonad stimulating principle                                |
| 206001 | H11 | C7H8O         | 108.1412 | antiinfectant                                              |
| 206002 | A02 | C23H14Na2O11  | 512.341  | antiasthmatic, antiallergy                                 |
| 206002 | A03 | C26H52N6O11S  | 656.8019 | chelating agent (Fe & Al)                                  |
| 206002 | A04 | C20H30ClN3O2  | 379.934  | anesthetic (local)                                         |
| 206002 | A05 | C21H43N7O16S  | 681.6782 | antibacterial, tuberculostatic                             |
| 206002 | A06 | C10H20N2S4    | 296.5403 | alcohol antagonist                                         |
| 206002 | A07 | C18H24O2      | 272.3908 | estrogen                                                   |
| 206002 | A08 | C19H25ClN2S   | 348.9415 | antiparkinsonian, anticholinergic                          |
| 206002 | A09 | C31H48O6      | 516.7246 | antibacterial                                              |
| 206002 | A10 | C10H24N4O4S   | 296.3912 | antihypertensive, mitotic agent                            |
| 206002 | A11 | C17H24BrNO3   | 370.2897 | anticholinergic (ophthalmic)                               |
| 206002 | B02 | C18H22N2      | 266.3894 | H1 antihistamine                                           |
| 206002 | B03 | C24H33NaO5    | 424.5174 | choleric                                                   |
| 206002 | B04 | C14H10Cl2NNaO | 318.1371 | antiinflammatory                                           |
| 206002 | B05 | C24H28ClN5O3  | 469.9755 | antiemetic                                                 |
| 206002 | B06 | C8H12ClNO2    | 189.6433 | cardiotonic, antihypotensive                               |
| 206002 | B07 | C26H36O3      | 396.575  | estrogen                                                   |
| 206002 | B08 | C10H12O2      | 164.2059 | analgesic (topical), antiseptic, antifungal                |
| 206002 | B09 | C30H60I3N3O3  | 891.5442 | muscle relaxant (skeletal)                                 |
| 206002 | B10 | C7H5Cl2NO4S   | 270.0922 | antiinfectant                                              |
| 206002 | B11 | C8H9ClN4      | 196.6407 | antihypertensive                                           |
| 206002 | C02 | C17H26ClNO3   | 327.8547 | mydriatic                                                  |



Lee et al Supplemental Table 1

|        |     |               |          |                                                      |
|--------|-----|---------------|----------|------------------------------------------------------|
| 206002 | C03 | C21H22Cl2N2O8 | 501.3241 | antibacterial                                        |
| 206002 | C04 | C19H16Cl2N3Na | 492.3163 | antibacterial                                        |
| 206002 | C05 | C14H12O4      | 244.2493 | ultraviolet screen                                   |
| 206002 | C06 | C18H28ClNO2   | 325.8824 | anesthetic (topical)                                 |
| 206002 | C07 | C23H32O3      | 356.5097 | estrogen                                             |
| 206002 | C08 | C23H31FO6     | 422.4983 | mineralocorticoid                                    |
| 206002 | C09 | C15H22O3      | 250.3408 | antihyperlipoproteinemic                             |
| 206002 | C10 | C21H23ClFNO2  | 375.8744 | antidyskinetic, antipsychotic                        |
| 206002 | C11 | C7H8ClN3O4S2  | 297.7405 | diuretic                                             |
| 206002 | D02 | C7H17Cl2N2O3P | 279.1049 | antineoplastic, alkylating agent                     |
| 206002 | D03 | C18H23ClN2    | 302.8504 | antidepressant                                       |
| 206002 | D04 | C19H12O6      | 336.3039 | anticoagulant                                        |
| 206002 | D05 | C17H22ClNO    | 291.824  | antihistaminic                                       |
| 206002 | D06 | C10H14N4O4    | 254.2475 | bronchodilator                                       |
| 206002 | D07 | C18H24O3      | 288.3902 | estrogen                                             |
| 206002 | D08 | C26H32F2O7    | 494.5375 | antiinflammatory, glucocorticoid                     |
| 206002 | D09 | C21H45N5O11S  | 575.6837 | antibacterial                                        |
| 206002 | D10 | C19H22KN3O4S  | 427.5709 | antibacterial                                        |
| 206002 | D11 | C23H32O6      | 404.5079 | glucocorticoid, antiinflammatory                     |
| 206002 | E02 | C3H6N2O2      | 102.0935 | antibacterial (tuberculostatic)                      |
| 206002 | E03 | C24H31FO6     | 434.5095 | glucocorticoid, antiinflammatory                     |
| 206002 | E04 | C18H18O2      | 266.343  | estrogen                                             |
| 206002 | E05 | C19H24ClNO    | 317.8622 | antihistaminic                                       |
| 206002 | E06 | C10H16N2Na3O8 | 361.217  | chelating agent, antioxidant                         |
| 206002 | E07 | C18H22O2      | 270.3748 | estrogen                                             |
| 206002 | E08 | C4H3FN2O2     | 130.0791 | antineoplastic, pyrimidine antimetabolite            |
| 206002 | E09 | C25H30ClN3    | 407.991  | antibacterial, anthelmintic                          |
| 206002 | E10 | C13H6Cl6O2    | 406.9096 | antiinfective (topical)                              |
| 206002 | E11 | C8H8F3N3O4S2  | 331.2939 | antihypertensive, diuretic                           |
| 206002 | F02 | C9H13N3O5     | 243.2211 | antineoplastic, antiviral, antimetabolite            |
| 206002 | F03 | C22H28FNa2O8P | 516.4155 | glucocorticoid, antiinflammatory                     |
| 206002 | F04 | C16H29N3O8    | 391.4248 | anthelmintic                                         |
| 206002 | F05 | C24H40N8O4    | 504.6376 | coronary vasodilator                                 |
| 206002 | F06 | C29H42Cl2N2O4 | 553.5751 | inhibits RNA, DNA and protein synthesis              |
| 206002 | F07 | C10H26Cl2N2O2 | 277.2369 | antibacterial (tuberculostatic)                      |
| 206002 | F08 | C15H13FO2     | 244.2681 | antiinflammatory, analgesic                          |
| 206002 | F09 | C6H14ClNO5    | 215.6352 | antiarthritic                                        |
| 206002 | F10 | C12H18O2      | 194.2761 | anthelmintic, topical antiseptic                     |
| 206002 | F11 | C27H40O4      | 428.6175 | progestogen                                          |
| 206002 | G02 | C22H27NO2     | 337.466  | anterior pituitary suppressant                       |
| 206002 | G03 | C18H26BrNO    | 352.318  | antitussive                                          |
| 206002 | G04 | C13H8F2O3     | 250.2037 | analgesic, antiinflammatory                          |
| 206002 | G05 | C10H10N2O2S2Z | 319.7014 | antibacterial, antifungal, antiseborrheic            |
| 206002 | G06 | C13H19NO9     | 333.2977 | adrenergic agonist, bronchodilator, antiglaucoma     |
| 206002 | G07 | C20H24O2      | 296.4131 | estrogen, plus progestogen as oral contraceptive     |
| 206002 | G08 | C8H7N3O5      | 225.1621 | antibacterial                                        |
| 206002 | G09 | C10H14O4      | 198.2207 | expectorant                                          |
| 206002 | G10 | C5H11Cl2N3    | 184.0695 | H receptor agonist, induces edema in mammalian       |
| 206002 | G11 | CH4N2O2       | 76.05523 | antineoplastic, inhibits ribonucleoside diphosphate  |
| 206002 | H02 | C12H12N2O2S   | 248.3056 | antibacterial, leprostatic, dermatitis herpetiformis |
| 206002 | H03 | C12H8S        | 184.2616 | keratolytic                                          |

Lee et al Supplemental Table 1

|        |     |                |          |                                                      |
|--------|-----|----------------|----------|------------------------------------------------------|
| 206002 | H04 | C41H64O14      | 780.9588 | cardiac stimulant                                    |
| 206002 | H05 | C21H32N3O5P    | 437.4801 | antiarrhythmic                                       |
| 206002 | H06 | C23H27N3O6     | 441.4881 | oxytocic, 5HT antagonist                             |
| 206002 | H07 | C8H10N2S       | 166.2463 | antibacterial, tuberculostatic                       |
| 206002 | H08 | C12H11Cl2N2O5S | 330.7489 | diuretic, antihypertensive                           |
| 206002 | H09 | C10H12Cl2N4O2  | 291.1387 | antihypertensive                                     |
| 206002 | H10 | C16H22BrNO3    | 356.2626 | anticholinergic (ophthalmic)                         |
| 206002 | H11 | C44H43ClN2O8   | 763.2949 | anxiolytic, antihistaminic                           |
| 206003 | A02 | C41H64O13      | 764.9594 | inotropic, cardiotonic                               |
| 206003 | A03 | C6H7N3O        | 137.1422 | antibacterial, tuberculostatic                       |
| 206003 | A04 | C9H13NO3       | 183.2089 | vasoconstrictor                                      |
| 206003 | A05 | C24H34O4       | 386.5362 | contraceptive                                        |
| 206003 | A06 | C11H15NO5      | 241.2459 | muscle relaxant (skeletal)                           |
| 206003 | A07 | C18H15Cl4N3O4  | 479.15   | antifungal (topical)                                 |
| 206003 | A08 | C12H19BrN2O2   | 303.2014 | cholinergic                                          |
| 206003 | A09 | C20H26O2       | 298.429  | progestogen, in combination with estrogen as oral    |
| 206003 | A10 | C24H31NO8      | 461.5166 | muscle relaxant (skeletal), antihistaminic           |
| 206003 | A11 | C5H11NO2S      | 149.2129 | chelating agent (Cu), antirheumatic                  |
| 206003 | B02 | C17H23NO3      | 289.3778 | anticholinergic, analgesic                           |
| 206003 | B03 | C23H33IN2O     | 480.4367 | anticholinergic                                      |
| 206003 | B04 | C18H35ClN2O6S  | 443.0065 | antibacterial                                        |
| 206003 | B05 | C22H32O3       | 344.4985 | glucocorticoid                                       |
| 206003 | B06 | C20H22N8O5     | 454.4489 | antineoplastic, antirheumatic, folic acid antagonist |
| 206003 | B07 | C9H15N5O       | 209.2528 | antihypertensive, antialopecia agent                 |
| 206003 | B08 | C6H5NO2        | 123.1123 | antihyperlipidemic, vitamin (enzyme cofactor)        |
| 206003 | B09 | C16H18FN3O3    | 319.3386 | antibacterial                                        |
| 206003 | B10 | C19H18N3NaO5S  | 423.4262 | antibacterial                                        |
| 206003 | B11 | C16H17KN2O4S   | 372.4909 | antibacterial                                        |
| 206003 | C02 | C13H18O2       | 206.2872 | antiinflammatory                                     |
| 206003 | C03 | C11H18ClNO3    | 247.724  | bronchodilator                                       |
| 206003 | C04 | C7H11ClN2O2S   | 222.6949 | antibacterial                                        |
| 206003 | C05 | C24H32O4       | 384.5202 | progestogen, antineoplastic                          |
| 206003 | C06 | C12H8O4        | 216.1952 | antipsoriatic, pigmentation agent                    |
| 206003 | C07 | C20H18N6Na2O9  | 564.4449 | antibacterial                                        |
| 206003 | C08 | C17H18N2O6     | 346.3428 | antianginal, antihypertensive                        |
| 206003 | C09 | C21H28O2       | 312.4561 | progestogen                                          |
| 206003 | C10 | C14H12O3       | 228.2499 | ultraviolet screen                                   |
| 206003 | C11 | C11H12ClN5     | 249.7048 | analgesic                                            |
| 206003 | D02 | C19H25ClN2     | 316.8775 | antidepressant                                       |
| 206003 | D03 | C6H8N2O8       | 236.1393 | antianginal                                          |
| 206003 | D04 | C20H24ClN      | 313.874  | antidepressant                                       |
| 206003 | D05 | C21H26BrNO3    | 420.3503 | anticholinergic                                      |
| 206003 | D06 | C18H24BrNO4    | 398.3003 | anticholinergic                                      |
| 206003 | D07 | C21H21N2NaO5S  | 436.4657 | antibacterial                                        |
| 206003 | D08 | C8H6N4O5       | 238.1608 | antibacterial                                        |
| 206003 | D09 | C19H21N        | 263.3859 | antidepressant                                       |
| 206003 | D10 | C16H25ClN2O    | 296.8435 | adrenergic agonist, nasal decongestant               |
| 206003 | D11 | C8H14N2O4S     | 234.2758 | antidepressant                                       |
| 206003 | E02 | C16H16ClN3O3S  | 365.8412 | diuretic, antihypertensive                           |
| 206003 | E03 | C18H24ClNO3    | 337.8499 | vasodilator                                          |
| 206003 | E04 | C11H22ClN      | 203.7577 | antihypertensive                                     |

Lee et al Supplemental Table 1

|        |     |                |          |                                                          |
|--------|-----|----------------|----------|----------------------------------------------------------|
| 206003 | E05 | C5H4N4S        | 152.1784 | antineoplastic, purine antimetabolite                    |
| 206003 | E06 | C10H13NO4      | 211.2194 | antihypertensive                                         |
| 206003 | E07 | C19H22CINO4    | 363.8445 | narcotic antagonist                                      |
| 206003 | E08 | C6H6N4O4       | 198.1391 | antiinfective (topical)                                  |
| 206003 | E09 | C22H24CINO7    | 449.8921 | antitussive                                              |
| 206003 | E10 | C9H9NO5S       | 243.2398 | antiinfectant                                            |
| 206003 | E11 | C15H10O2       | 222.2458 | anticoagulant                                            |
| 206003 | F02 | C19H16CINO4    | 357.7967 | antiinflammatory, antipyretic, analgesic                 |
| 206003 | F03 | C18H38N4O15S   | 582.5854 | antibacterial                                            |
| 206003 | F04 | C5H11CI2N      | 156.0561 | antineoplastic, alkylating agent                         |
| 206003 | F05 | C11H17NO3      | 211.263  | bronchodilator                                           |
| 206003 | F06 | C14H23CI2N3O2  | 336.2643 | antiemetic                                               |
| 206003 | F07 | C14H15CIN2     | 246.7421 | adrenergic agonist, nasal decongestant                   |
| 206003 | F08 | C7H5N3O5       | 211.135  | antibacterial, coccidiostat                              |
| 206003 | F09 | C31H35N2NaO11  | 634.6212 | antibacterial                                            |
| 206003 | F10 | C22H25CIN2O9   | 496.9056 | antibacterial                                            |
| 206003 | F11 | C9H14CINO      | 187.671  | decongestant, anorexic                                   |
| 206003 | G02 | C17H15NO3      | 281.314  | analgesic, antiinflammatory                              |
| 206003 | G03 | C26H28CI2N4O4  | 531.4435 | antifungal                                               |
| 206003 | G04 | C25H29CI3N2    | 463.8823 | antiemetic                                               |
| 206003 | G05 | C6H12N4        | 140.1893 | antibacterial (urinary)                                  |
| 206003 | G06 | C19H31NO9      | 417.4602 | antihypertensive, antianginal                            |
| 206003 | G07 | C14H14O3       | 230.2659 | antiinflammatory, analgesic, antipyretic                 |
| 206003 | G08 | C8H11NO3       | 169.1818 | adrenergic agonist, antihypotensive                      |
| 206003 | G09 | C19H26CINO2    | 335.8776 | vasodilator (peripheral)                                 |
| 206003 | G10 | C20H22CINO4    | 375.8556 | muscle relaxant (smooth), cerebral vasodilator           |
| 206003 | G11 | C15H11N2NaO2   | 274.2569 | anticonvulsant, antiepileptic                            |
| 206003 | H02 | C9H5I2NO       | 396.9551 | antiamebic                                               |
| 206003 | H03 | C20H21CaN7O7   | 511.5131 | antianemic, antidote to folic acid antagonists           |
| 206003 | H04 | C14H10CI2NNaO  | 318.1371 | antiinflammatory, antipyretic                            |
| 206003 | H05 | C4H6N2S        | 114.1698 | antihyperthyroid                                         |
| 206003 | H06 | C6H9N3O3       | 171.1569 | antiprotozoal                                            |
| 206003 | H07 | C23H48N6O17S   | 712.733  | antibacterial                                            |
| 206003 | H08 | C22H28O3       | 340.4667 | Oral contraceptive (in combination with estrogen)        |
| 206003 | H09 | C47H75NO17     | 926.1183 | antifungal, binds to membrane sterols                    |
| 206003 | H10 | C6H5CIO        | 128.5592 | topical antibacterial (topical)                          |
| 206003 | H11 | C22H27N3O5     | 413.4776 | cholinergic, anticholinesterase, mitotic                 |
| 206004 | A02 | C11H17N3O5     | 271.2752 | antiglaucoma agent, miotic                               |
| 206004 | A03 | C16H22CINO2    | 295.8122 | antihypertensive, antianginal, antiarrhythmic            |
| 206004 | A04 | C43H58N4O12    | 822.9613 | antibacterial (tuberculostatic)                          |
| 206004 | A05 | C8H15N3O7      | 265.2247 | antineoplastic, alkylating agent                         |
| 206004 | A06 | C9H9N3O2S2     | 255.319  | antibacterial                                            |
| 206004 | A07 | C12H18N2O3S    | 270.3529 | antidiabetic                                             |
| 206004 | A08 | C21H26CI2F3N3S | 480.4267 | antipsychotic                                            |
| 206004 | A09 | C11H12N2O2     | 204.2305 | antidepressant, nutrient; LD50(rat) 1634 mg/kg ip        |
| 206004 | A10 | C14H14CIN3     | 259.7408 | antiinfective, intercalating agent                       |
| 206004 | A11 | C23H36N4O10S2  | 592.6922 | antiprotozoal, inhibits nucleic acid & protein synthesis |
| 206004 | B02 | C4H10N2        | 86.1377  | anthelmintic                                             |
| 206004 | B03 | C10H16CINO     | 201.6981 | decongestant                                             |
| 206004 | B04 | C6H6AsNO6      | 263.0394 | antibacterial                                            |
| 206004 | B05 | C8H10N2O3S     | 214.2445 | antibacterial                                            |

Lee et al Supplemental Table 1

|        |     |                |          |                                                 |
|--------|-----|----------------|----------|-------------------------------------------------|
| 206004 | B06 | C20H17FO3S     | 356.4191 | antiinflammatory                                |
| 206004 | B07 | C19H17NOS      | 307.4174 | antifungal                                      |
| 206004 | B08 | C20H32CINO     | 337.9371 | anticholinergic, antiparkinsonian               |
| 206004 | B09 | C7H19NO4S      | 213.2978 | adrenergic agonist                              |
| 206004 | B10 | C9H5Br2NO      | 302.9543 | antiinfectant, disinfectant                     |
| 206004 | B11 | C10H13NO2      | 179.2206 | analgesic, antipyretic                          |
| 206004 | C02 | C19H24N2O2     | 312.4153 | anthelmintic                                    |
| 206004 | C03 | C34H30N2O6S    | 594.692  | anthelmintic                                    |
| 206004 | C04 | C7H8O2         | 124.1406 | anesthetic (local), antiinflammatory            |
| 206004 | C05 | C10H10N4O2S    | 250.2808 | antibacterial                                   |
| 206004 | C06 | C22H25CIN2O8   | 480.9062 | antibacterial, antiamebic, antirickettsial      |
| 206004 | C07 | C9H13NO4S      | 231.2723 | antidepressant                                  |
| 206004 | C08 | C22H28N2O6S    | 448.5423 | antipruritic                                    |
| 206004 | C09 | C66H85N11O15   | 1272.478 | topical antibacterial (topical)                 |
| 206004 | C10 | C7H16CINO3     | 197.6635 | antihyperlipoproteinemic, gastric and           |
| 206004 | C11 | C8H8HgO2       | 336.7418 | antifungal                                      |
| 206004 | D02 | C15H27N3O9P2   | 455.3447 | antimalarial                                    |
| 206004 | D03 | C12H13CIN4     | 248.7172 | antimalarial                                    |
| 206004 | D04 | C17H22BrNO4    | 384.2732 | anticholinergic, treatment of motion sickness   |
| 206004 | D05 | C11H12N4O2S    | 264.3079 | antibacterial                                   |
| 206004 | D06 | C7H8N4O2       | 180.1674 | bronchodilator                                  |
| 206004 | D07 | C9H14O6        | 218.2083 | antifungal (topical)                            |
| 206004 | D08 | C21H29CIN2O5   | 424.9287 | antiemetic                                      |
| 206004 | D09 | C24H40O4       | 392.584  | anticholelithogenic; LD50(rat) 890 mg/kg ip     |
| 206004 | D10 | C18H22O2       | 270.3748 | estrogen, antineoplastic (hormonal)             |
| 206004 | D11 | C21H32O2       | 316.488  | glucocorticoid, antiinflammatory                |
| 206004 | E02 | C22H30CIN3O6S  | 564.1459 | antiemetic, antipsychotic, treatment of vertigo |
| 206004 | E03 | C23H32Cl3N3O   | 472.89   | anthelmintic, antimalarial, intercalating agent |
| 206004 | E04 | C19H39N5O11S   | 545.6136 | antibacterial, binds to ribosomes               |
| 206004 | E05 | C12H14N4O2S    | 278.335  | antibacterial                                   |
| 206004 | E06 | C10H7N3S       | 201.2514 | anthelmintic                                    |
| 206004 | E07 | C24H31FO6      | 434.5095 | antiinflammatory                                |
| 206004 | E08 | C14H18N4O3     | 290.3246 | antibacterial                                   |
| 206004 | E09 | C67H77Cl3N8O24 | 1484.759 | antibacterial                                   |
| 206004 | E10 | C21H45N3       | 339.6129 | antifungal                                      |
| 206004 | E11 | C9H16O4        | 188.2255 | antiacne, antiproliferative agent               |
| 206004 | F02 | C17H21CIN2S    | 320.8873 | antipsychotic                                   |
| 206004 | F03 | C26H36N2O9     | 520.5848 | antiarrhythmic, antimalarial                    |
| 206004 | F04 | C14H26Cl2N2O7  | 405.2785 | antibacterial                                   |
| 206004 | F05 | C10H11N3O3S    | 253.2815 | antibacterial, antipneumocystis                 |
| 206004 | F06 | C9H9HgNaO2S    | 404.8147 | antiinfective, preservative                     |
| 206004 | F07 | C25H31FO8      | 478.5194 | antiinflammatory                                |
| 206004 | F08 | C14H12O3       | 228.2499 | melanizing agent, antipsoriatic                 |
| 206004 | F09 | C10H13N5O4     | 267.2462 | antiviral                                       |
| 206004 | F10 | C9H15N3O5S     | 277.301  | monoamine oxidase inhibitor, antidepressant     |
| 206004 | F11 | C7H8N4O2       | 180.1674 | diuretic, bronchodilator, cardiotonic           |
| 206004 | G02 | C17H21CIN2S    | 320.8873 | antihistaminic                                  |
| 206004 | G03 | C20H26N2O6S    | 422.504  | antimalarial, skeletal muscle relaxant          |
| 206004 | G04 | C24H32O4S      | 416.5842 | diuretic                                        |
| 206004 | G05 | C11H11N3O2S    | 249.2932 | antibacterial                                   |
| 206004 | G06 | C5H5N5S        | 167.1931 | antineoplastic, purine antimetabolite           |

Lee et al Supplemental Table 1

|        |     |               |          |                                                       |
|--------|-----|---------------|----------|-------------------------------------------------------|
| 206004 | G07 | C12H11N7      | 253.2684 | diuretic                                              |
| 206004 | G08 | C19H23ClN2    | 314.8616 | antihistaminic                                        |
| 206004 | G09 | C16H25ClN2    | 280.8441 | adrenergic agonist, nasal decongestant                |
| 206004 | G10 | C20H8Br2HgNa2 | 750.6608 | antibacterial                                         |
| 206004 | G11 | C20H26N2O2    | 326.4424 | antiarrhythmic (Class Ia): inhibits glucose uptake by |
| 206004 | H02 | C23H30BrNO3   | 448.4045 | anticholinergic                                       |
| 206004 | H03 | C6H6O2        | 110.1135 | keratolytic, antiseborheic                            |
| 206004 | H04 | C21H41N7O16S  | 679.6622 | antibacterial (tuberculostatic)                       |
| 206004 | H05 | C18H14N4O5S   | 398.4001 | anticolitis and Crohn's disease                       |
| 206004 | H06 | C17H28N4O7S   | 432.4993 | betaadrenergic blocker                                |
| 206004 | H07 | C8H8Cl3N3O4S2 | 380.6577 | diuretic, antihypertensive                            |
| 206004 | H08 | C17H20N2O2    | 284.3612 | anticholinergic (ophthalmic)                          |
| 206004 | H09 | C15H14ClNO3   | 291.7367 | analgesic, antiinflammatory                           |
| 206004 | H10 | C8H12ClNO2    | 189.6433 | adrenergic agonist                                    |
| 206004 | H11 | C20H26N2O2    | 326.4424 | antiarrhythmic, antimalarial                          |
| 206005 | A02 | C23H23NO5S    | 425.5075 | antiasthmatic                                         |
| 206005 | A03 | C17H20O6      | 320.3454 | antineoplastic                                        |
| 206005 | A04 | C10H7NO3      | 189.1722 | nutrient in vitamin B deficiency diseases             |
| 206005 | A05 | C28H36O15     | 612.5901 | sweetener                                             |
| 206005 | A06 | C10H9N5O      | 215.2161 | auxin, plant growth regulator, plant cell division    |
| 206005 | A07 | C11H14ClN3O4S | 383.8969 | diuretic                                              |
| 206005 | A08 | C21H22ClNO4   | 387.8668 | antibacterial, uterine contractant                    |
| 206005 | A09 | C13H20N2O2    | 236.3166 | antitussive                                           |
| 206005 | A10 | C37H42Cl2N2O6 | 681.6631 | antihypertensive, skeletal muscle relaxant            |
| 206005 | A11 | C34H34N4O4    | 562.6745 | hepatoprotectant                                      |
| 206005 | B02 | C21H27ClN2O3  | 390.9139 | alpha adrenergic blocker, mydriatic, antidepressant   |
| 206005 | B03 | C35H64NO16P   | 785.8712 | antibacterial                                         |
| 206005 | B04 | C14H23ClN2O   | 270.8052 | anesthetic (local), antiarrhythmic                    |
| 206005 | B05 | C21H20O11     | 448.387  | antihemorrhagic                                       |
| 206005 | B06 | C27H32O14     | 580.5477 | antihaemorrhagic, antiinflammatory                    |
| 206005 | B07 | C20H18ClNO4   | 371.8238 | antiarrhythmic, alpha2 agonist, cholinesterase,       |
| 206005 | B08 | C17H19NO3     | 285.3459 | analeptic, antibacterial                              |
| 206005 | B09 | C17H21NO3     | 287.3618 | antiinflammatory                                      |
| 206005 | B10 | C23H26ClN     | 351.9234 | coronary vasodilator                                  |
| 206005 | B11 | C21H28ClNO4   | 393.9146 | analgesic, narcotic antagonist                        |
| 206005 | C02 | C19H21ClF3NO2 | 387.8329 | antihyperlipoproteinemic                              |
| 206005 | C03 | C29H44O12     | 584.6668 | antiarrhythmic, cardiotoxic, hypertensive, Na/K       |
| 206005 | C04 | C13H17NO4     | 251.2847 | chymotrypsin substrate                                |
| 206005 | C05 | C15H21N3O2    | 275.3535 | anticholinesterase, mitotic, antiglaucoma, cognition  |
| 206005 | C06 | C11H15NO2     | 193.2477 | anesthetic (local)                                    |
| 206005 | C07 | C22H29KO4     | 396.576  | aldosterone antagonist, diuretic                      |
| 206005 | C08 | C15H16O9      | 340.2894 | antiinflammatory                                      |
| 206005 | C09 | C17H22BrNO4   | 384.2732 | betaadrenergic agonist                                |
| 206005 | C10 | C22H23ClN2O8  | 478.8902 | antibacterial                                         |
| 206005 | C11 | C29H28N2O6S2  | 564.6843 | H1 antihistamine                                      |
| 206005 | D02 | C6H8N2O2S     | 172.2069 | antibacterial                                         |
| 206005 | D03 | C19H20N8O5    | 440.4219 | antineoplastic, antirheumatic, folic acid antagonist  |
| 206005 | D04 | C13H15N3O2    | 245.2834 | antidepressant, nutrient                              |
| 206005 | D05 | C10H7NO4      | 205.1716 | caspase activator, guanylyl cyclase stimulant         |
| 206005 | D06 | C15H14ClN3O4S | 367.8135 | antibacterial                                         |
| 206005 | D07 | C12H13ClN2O   | 236.7032 | anthelmintic, narcotic agent                          |

Lee et al Supplemental Table 1

|        |     |               |          |                                                          |
|--------|-----|---------------|----------|----------------------------------------------------------|
| 206005 | D08 | C41H63NO15    | 809.957  | antihypertensive, emetic; LD50(mouse) 0.21 mg/kg         |
| 206005 | D09 | C16H14O3      | 254.2882 | antiinflammatory                                         |
| 206005 | D10 | C22H31Cl2N7O5 | 544.4423 | antineoplastic, antiprotozoal                            |
| 206005 | D11 | C25H36ClNO5   | 466.0224 | muscle relaxant (smooth)                                 |
| 206005 | E02 | C21H22N2O2    | 334.4217 | central stimulant                                        |
| 206005 | E03 | C8H14BrNO2    | 236.1103 | anthelmintic (Cestodes), hypotensive, cathartic          |
| 206005 | E04 | C7H11NO3      | 157.1706 | antirheumatic                                            |
| 206005 | E05 | C22H28ClNO2   | 373.927  | antiasthmatic, respiratory stimulant                     |
| 206005 | E06 | C12H11I3N2O4  | 627.9457 | radioopaque agent                                        |
| 206005 | E07 | C13H14N2O     | 214.2693 | CNS stimulant, antiparkinsonian agent                    |
| 206005 | E08 | C30H46O4      | 470.6987 | antiinflammatory                                         |
| 206005 | E09 | C21H21NO6     | 383.4046 | uterine hemostatic, antiseptic                           |
| 206005 | E10 | C15H16O6      | 292.2912 | convulsant, GABA receptor antagonist, ichthyotoxin       |
| 206005 | E11 | C29H27ClN2O14 | 695.0605 | antibacterial                                            |
| 206005 | F02 | C15H10O7      | 302.2428 | capillary protectant, antioxidant. antineoplastic, anti- |
| 206005 | F03 | C9H15NO3S     | 217.2888 | antihypertensive                                         |
| 206005 | F04 | C11H10O4      | 206.2    | photosensitizing agent                                   |
| 206005 | F05 | C27H42O4      | 430.6334 | antiinflammatory                                         |
| 206005 | F06 | C15H11I4NO4   | 776.8768 | antihypercholesterimic, thyromimetic                     |
| 206005 | F07 | C13H12N2O     | 212.2534 | antiparkinsonian, CNS stimulant                          |
| 206005 | F08 | C14H12FNO3    | 261.255  | antibacterial                                            |
| 206005 | F09 | C20H21ClO4    | 360.841  | antihyperlipidemic                                       |
| 206005 | F10 | C15H25ClN2O3  | 316.8311 | stimulant (central)                                      |
| 206005 | F11 | C18H26N2O4    | 334.4189 | anticholinergic                                          |
| 206005 | G02 | C8H15NaO2     | 166.1974 | anticonvulsant                                           |
| 206005 | G03 | C10H16N6S     | 252.3432 | antiulcerative                                           |
| 206005 | G04 | C15H10O4      | 254.2446 | diuretic                                                 |
| 206005 | G05 | C30H26N2O13   | 622.5473 | chelating agent (Ca, Mg)                                 |
| 206005 | G06 | C4H2N2O4      | 142.0715 | specific cytotoxin (pancreatic islet betacell)           |
| 206005 | G07 | C8H10N2O4     | 198.1799 | depilatory agent                                         |
| 206005 | G08 | C22H28Cl2F3N3 | 510.4532 | H1 antihistamine                                         |
| 206005 | G09 | C15H14O3      | 242.277  | antiinflammatory                                         |
| 206005 | G10 | C31H48O2S2    | 516.855  | antihyperlipidemic                                       |
| 206005 | G11 | C17H24Cl2N4O  | 371.313  | psychotropic                                             |
| 206005 | H02 | C9H14N4O4     | 242.2363 | antianginal                                              |
| 206005 | H03 | C18H19ClN4    | 326.8319 | antipsychotic                                            |
| 206005 | H04 | C15H12O5      | 272.2599 | antiulcer, gibberellin antagonist                        |
| 206005 | H05 | C2H7N3O3      | 121.0964 | striated muscle stimulant                                |
| 206005 | H06 | C4H6N4O3      | 158.1174 | wound healing agent                                      |
| 206005 | H07 | C11H8N2       | 168.1998 | plant growth inhibitor; mutagen                          |
| 206005 | H08 | C8H15N7O2S3   | 337.4465 | H2 antihistamine                                         |
| 206005 | H09 | C15H13N3O2S   | 299.3538 | anthelmintic                                             |
| 206005 | H10 | C16H13N3O3    | 295.3003 | anthelmintic                                             |
| 206005 | H11 | C12H22ClN     | 215.7688 | muscle relaxant (skeletal)                               |
| 206006 | A02 | C3H9NO3S      | 139.1741 | antibacterial                                            |
| 206006 | A03 | C17H19NO      | 253.3471 | analgesic                                                |
| 206006 | A04 | C24H26N2O6    | 438.4846 | analgesic, antipyretic, antiinflammatory                 |
| 206006 | A05 | C19H26O2      | 286.4179 | estrogen                                                 |
| 206006 | A06 | C20H30O       | 286.4615 | vitamin A                                                |
| 206006 | A07 | C7H7O6P       | 218.104  | analgesic, antiinflammatory                              |
| 206006 | A08 | C16H15N4NaO8S | 446.3738 | antibacterial                                            |

Lee et al Supplemental Table 1

|        |     |               |          |                                                          |
|--------|-----|---------------|----------|----------------------------------------------------------|
| 206006 | A09 | C19H20ClNO4   | 361.8286 | antihyperlipidemic                                       |
| 206006 | A10 | C5H9N3O2      | 143.1464 | regulator of creatine biosynthesis                       |
| 206006 | A11 | C2H9ClN2      | 96.56043 | antineoplastic                                           |
| 206006 | B02 | C5H12ClNO2    | 153.6099 | GABA <sub>B</sub> antagonist                             |
| 206006 | B03 | C19H23Cl2N5O2 | 424.3335 | antiulcerative                                           |
| 206006 | B04 | C14H12O3S     | 260.3139 | antiinflammatory                                         |
| 206006 | B05 | C20H26O3      | 314.4284 | estrogen                                                 |
| 206006 | B06 | C15H14O3      | 242.277  | antineoplastic, antifungal                               |
| 206006 | B07 | C2H5NaO3S2    | 164.1782 | mucolytic                                                |
| 206006 | B08 | C17H18N3NaO4S | 383.4045 | antibacterial                                            |
| 206006 | B09 | C15H11I3NNaO4 | 672.9622 | thyroid hormone                                          |
| 206006 | B10 | C10H7NO3      | 189.1722 | inhibit mitochondrial pyruvate transport                 |
| 206006 | B11 | C30H44K2O16S2 | 803.0076 | oxidative phosphorylation inhibitor                      |
| 206006 | C02 | C14H22N2O3    | 266.343  | beta adrenergic blocker                                  |
| 206006 | C03 | C17H28ClNO3   | 329.8706 | anesthetic (topical)                                     |
| 206006 | C04 | C15H13NO4     | 271.2752 | analgesic, antipyretic                                   |
| 206006 | C05 | C9H11FN2O5    | 246.1968 | antineoplastic, pyrimidine antimetabolite                |
| 206006 | C06 | C16H14O3      | 254.2882 | antiinflammatory                                         |
| 206006 | C07 | C20H28O2      | 300.445  | keratolytic                                              |
| 206006 | C08 | C17H20ClF2N3O | 387.8171 | antibacterial                                            |
| 206006 | C09 | C19H17N3O4S2  | 415.493  | antibacterial                                            |
| 206006 | C10 | C10H14O2      | 166.2219 | inhibits posttranslational cys isoprenylation, blocks G- |
| 206006 | C11 | C6H10ClNO2    | 163.6051 | muscarinic agonist                                       |
| 206006 | D02 | C26H39NO10    | 525.6014 | antitussive                                              |
| 206006 | D03 | C10H14O3      | 182.2213 | muscle relaxant (skeletal)                               |
| 206006 | D04 | C8H9NO        | 135.167  | analgesic, antipyretic                                   |
| 206006 | D05 | C25H30O3      | 378.5161 | estrogen                                                 |
| 206006 | D06 | C21H31N3O5    | 405.4983 | ACE inhibitor                                            |
| 206006 | D07 | C18H24BrNO3S  | 414.3649 | inhibitor of norepinephrine release                      |
| 206006 | D08 | C3H5CaO4P     | 176.1247 | antibacterial                                            |
| 206006 | D09 | C9H6ClNO2     | 195.6067 | NMDA receptor antagonist (gly)                           |
| 206006 | D10 | C7H5NO4       | 167.1222 | differentiates between cerebral and forebrain NMDA       |
| 206006 | D11 | C8H13N3O4S    | 247.2745 | antiprotozoal                                            |
| 206006 | E02 | C5H6N2        | 94.11697 | Kchannel blocker                                         |
| 206006 | E03 | C15H14N4O2S   | 314.3684 | antibacterial                                            |
| 206006 | E04 | C11H13ClN4O2  | 268.7049 | antihypertensive, peripheral vasodilator                 |
| 206006 | E05 | C18H23NaO5S   | 374.4348 | estrogen                                                 |
| 206006 | E06 | C8H15NO3      | 173.2137 | antivertigo                                              |
| 206006 | E07 | CNa3O5P       | 191.9514 | antiviral                                                |
| 206006 | E08 | C19H17N6NaO6S | 512.5017 | antibacterial                                            |
| 206006 | E09 | C10H6ClNO3    | 223.6172 | NMDA receptor antagonist (gly)                           |
| 206006 | E10 | C14H8O2       | 208.2187 | irritant                                                 |
| 206006 | E11 | C6H11NO2      | 129.1601 | NMDA receptor antagonist (gly)                           |
| 206006 | F02 | C10H18O       | 154.2544 | weak estrogen receptor blocker                           |
| 206006 | F03 | C13H22N4O3S   | 314.4093 | H2 antihistamine                                         |
| 206006 | F04 | C19H26O3      | 302.4173 | estrogen                                                 |
| 206006 | F05 | C14H12ClNO2   | 261.7102 | antiinflammatory, analgesia                              |
| 206006 | F06 | C17H20N2O5S   | 364.4234 | diuretic                                                 |
| 206006 | F07 | C19H19N7O6    | 441.4066 | hematopoietic vitamin                                    |
| 206006 | F08 | C8H12N2O4S    | 232.2598 | cholinesterase reactivator                               |
| 206006 | F09 | C16H13NO4     | 283.2863 | aldose reductase inhibitor                               |

Lee et al Supplemental Table 1

|        |     |                |          |                                                        |
|--------|-----|----------------|----------|--------------------------------------------------------|
| 206006 | F10 | C6H12N2O4Pt    | 371.2635 | antineoplastic, convulsant                             |
| 206006 | F11 | C4H7NO2        | 101.1059 | NMDA partial agonist (gly)                             |
| 206006 | G02 | C24H26BrN3O3   | 484.3971 | vasodilator                                            |
| 206006 | G03 | C20H35NOS      | 337.5721 | peripheral vasodilator                                 |
| 206006 | G04 | C21H28O3       | 328.4555 | estrogen                                               |
| 206006 | G05 | C13H13N5O2     | 271.2809 | cGMP phosphodiesterase inhibitor                       |
| 206006 | G06 | C34H48Na2O7    | 614.7371 | antiinflammatory, antisecretory, antiulcer             |
| 206006 | G07 | C8H15NO2       | 157.2143 | hemostatic                                             |
| 206006 | G08 | C18H20FN3O4    | 361.3762 | antibacterial                                          |
| 206006 | G09 | C9H7NO2        | 161.1616 | NMDA receptor antagonist (gly)                         |
| 206006 | G10 | C8H12N4O5      | 244.2086 | antineoplastic, pyrimidine antimetabolite              |
| 206006 | G11 | C16H16N2O4     | 300.3169 | chloride channel blocker                               |
| 206006 | H02 | C28H29F2N3O    | 461.5596 | antipsychotic                                          |
| 206006 | H03 | C6H8N4O4       | 200.1551 | antiprotozoal                                          |
| 206006 | H04 | C20H24O3       | 312.4125 | estrogen                                               |
| 206006 | H05 | C17H22BrNO3    | 368.2738 | anticholinesterase, analgesic, antiAlzheimer           |
| 206006 | H06 | C15H12ClNO2    | 273.7214 | antiinflammatory, analgesic                            |
| 206006 | H07 | C16H16N3NaO7S  | 449.4396 | antibacterial                                          |
| 206006 | H08 | C14H16N4O3     | 288.3086 | antibacterial                                          |
| 206006 | H09 | C21H23NO4      | 353.4218 | antiinflammatory                                       |
| 206006 | H10 | C5H7N3O4       | 173.1292 | antineoplastic, amino acid antagonist                  |
| 206006 | H11 | C21H31N3O5S    | 437.5623 | chemotactic peptide                                    |
| 206007 | A02 | C15H20N2O4S    | 324.4017 | chemotactic peptide                                    |
| 206007 | A03 | C16H12O3       | 252.2722 | anticoagulant                                          |
| 206007 | A04 | C24H32N4O5     | 456.5464 | TAN inhibitor                                          |
| 206007 | A05 | C12H14N2O2     | 218.2576 | insecticide                                            |
| 206007 | A06 | C37H63NaO10    | 690.8985 | antibacterial                                          |
| 206007 | A07 | C8H15NO3       | 173.2137 | wound healing agent                                    |
| 206007 | A08 | C13H19Br2ClN2O | 414.5702 | expectorant                                            |
| 206007 | A09 | C30H40Cl2N4    | 527.5861 | antiinfectant                                          |
| 206007 | A10 | C9H13BrN2O2    | 261.1202 | cholinergic                                            |
| 206007 | A11 | C3H4O2         | 72.06413 | antiinfective                                          |
| 206007 | B02 | C22H35N3O6S    | 469.6048 | chemotactic peptide                                    |
| 206007 | B03 | C62H111N11O12  | 1202.642 | immunosuppressant                                      |
| 206007 | B04 | C7H15N3O2S     | 205.2805 | nitric oxide synthase inhibitor                        |
| 206007 | B05 | C12H11ClN2O    | 234.6873 | MAO inhibitor                                          |
| 206007 | B06 | C15H10O7       | 302.2428 | P450 and ATPase inhibitor                              |
| 206007 | B07 | C9H11FN2O5     | 246.1968 | antineoplastic, antimetabolite                         |
| 206007 | B08 | C6H10O6        | 178.143  | chelating agent                                        |
| 206007 | B09 | C10H20O        | 156.2703 | analgesic (topical), antipruritic agent                |
| 206007 | B10 | C14H13N3O5S    | 335.3408 | antiinflammatory                                       |
| 206007 | B11 | C23H47N5O18S   | 713.7177 | antibacterial, antiamebic                              |
| 206007 | C02 | C28H37N5O7     | 555.6364 | opioid neuromodulator                                  |
| 206007 | C03 | C41H67NO15     | 813.9888 | antibacterial                                          |
| 206007 | C04 | C15H23N3O10S   | 437.4287 | antiinflammatory, antiallergy, mast cell degranulation |
| 206007 | C05 | C19H22N2O      | 294.4    | cerebrotonic, muscle stimulant                         |
| 206007 | C06 | C8H7NS         | 149.2157 | antineoplastic, antibacterial, antifungal              |
| 206007 | C07 | C9H18N6        | 210.284  | antineoplastic                                         |
| 206007 | C08 | C7H4O3S        | 168.1721 | antiseborrheic                                         |
| 206007 | C09 | C12H15Cl2NO5S  | 356.2271 | antibacterial                                          |
| 206007 | C10 | C19H25ClN2O3   | 364.8757 | adrenergic blocker                                     |



Lee et al Supplemental Table 1

|        |     |               |          |                                                     |
|--------|-----|---------------|----------|-----------------------------------------------------|
| 206007 | C11 | C11H13CIN2S   | 240.7567 | immunomodulator                                     |
| 206007 | D02 | C23H39N5O7    | 497.5966 | Induces nicks at apurinic and apyrimidinic sites in |
| 206007 | D03 | C9H18N2O3     | 202.2554 | ubiquitin blocker, neurite growth inhibitor         |
| 206007 | D04 | C16H16N4O     | 280.3321 | beta-glucosidase inhibitor                          |
| 206007 | D05 | C21H24O9      | 420.42   | antifungal, antioxidant                             |
| 206007 | D06 | C10H16N2O3S   | 244.3146 | vitamin B complex                                   |
| 206007 | D07 | C9H10N2O3     | 194.1917 | renal function diagnosis                            |
| 206007 | D08 | C21H28CIN3O7S | 501.9902 | antibacterial                                       |
| 206007 | D09 | C13H11N3O4S2  | 337.3783 | antiinflammatory                                    |
| 206007 | D10 | C17H16N4O2    | 308.3427 | analgesic, antiinflammatory                         |
| 206007 | D11 | C24H32O6      | 416.519  | glucocorticoid                                      |
| 206007 | E02 | C11H16N2O8    | 304.2588 | neurotransmitter, mgluR3 receptors                  |
| 206007 | E03 | C21H28F3N3O6  | 475.469  | elastase (human) inhibitor                          |
| 206007 | E04 | C18H18CINO3   | 331.8021 | peptidase inhibitor, esterase inhibitor             |
| 206007 | E05 | C14H6O8       | 302.1991 | hemostatic, antineoplastic, antimutagenic           |
| 206007 | E06 | C8H7N3O5      | 225.1621 | antiprotozoal                                       |
| 206007 | E07 | C17H16F6N2O   | 378.3203 | antimalarial                                        |
| 206007 | E08 | C24H35CIN2O   | 403.0124 | antiarrhythmic                                      |
| 206007 | E09 | C19H42BrN     | 364.4573 | antiinfectant                                       |
| 206007 | E10 | C24H32CIFO5   | 454.971  | glucocorticoid, antiinflammatory                    |
| 206007 | E11 | C25H36O6      | 432.5621 | glucocorticoid, antiinflammatory                    |
| 206007 | F02 | C9H20N4O4     | 248.2842 | NO synthesis inhibitor                              |
| 206007 | F03 | C17H16O4      | 284.3147 | antineoplastic, antiinflammatory, immunomodulator,  |
| 206007 | F04 | C18H20N2O4    | 328.3711 | TAN inhibitor                                       |
| 206007 | F05 | C10H17N3O6S   | 307.3275 | antioxidant                                         |
| 206007 | F06 | C10H13NO7     | 259.2176 | vasodilator                                         |
| 206007 | F07 | C20H26CINO2   | 347.8887 | muscle relaxant (smooth)                            |
| 206007 | F08 | C5H9Cl2N3O2   | 214.0524 | antineoplastic, alkylating agent                    |
| 206007 | F09 | C9H5Cl2NO     | 214.0523 | chelating agent                                     |
| 206007 | F10 | C20H24N2O2S   | 356.4905 | anthelmintic, hepatotoxic                           |
| 206007 | F11 | C22H30Cl2N4O6 | 517.4136 | antineoplastic                                      |
| 206007 | G02 | C6H10N2O2     | 142.1588 | antinauseant                                        |
| 206007 | G03 | C16H21N3O3    | 303.3641 | ACE inhibitor                                       |
| 206007 | G04 | C14H12O3      | 228.2499 | antifungal, antibacterial                           |
| 206007 | G05 | C16H23NO6     | 325.3648 | antineoplastic, insect sterilant                    |
| 206007 | G06 | C4H9NO3       | 119.1212 | antiepileptic                                       |
| 206007 | G07 | C26H58Cl2N10  | 581.7252 | antibacterial                                       |
| 206007 | G08 | C18H16N8Na2O7 | 598.5492 | antibacterial                                       |
| 206007 | G09 | C21H26Cl2O    | 365.3468 | antibacterial                                       |
| 206007 | G10 | C13H12N2O5S   | 308.315  | antiinflammatory                                    |
| 206007 | G11 | C3H7NO2       | 89.09474 | antineoplastic, cytotoxic                           |
| 206007 | H02 | C21H26CINO2   | 359.8999 | antispasmodic                                       |
| 206007 | H03 | C17H25N3O4    | 335.4065 | immunostimulant                                     |
| 206007 | H04 | C20H16N2O4    | 348.3615 | antineoplastic                                      |
| 206007 | H05 | C13H18O7      | 286.2842 | analgesic, antipyretic                              |
| 206007 | H06 | C15H22O5      | 282.3396 | antimalarial                                        |
| 206007 | H07 | C25H31CIN2O5  | 474.9892 | antihypertensive, ACE inhibitor                     |
| 206007 | H08 | C19H23Cl2N5O  | 408.3341 | antidepressant                                      |
| 206007 | H09 | C34H53NaO8    | 612.7865 | antibacterial                                       |
| 206007 | H10 | C11H19NO4S    | 261.3424 | vasoconstrictor                                     |
| 206007 | H11 | C6H12N3PS     | 189.2204 | antineoplastic, alkylating agent                    |

Lee et al Supplemental Table 1

|        |     |               |          |                                                |
|--------|-----|---------------|----------|------------------------------------------------|
| 206008 | A02 | C11H8ClNO2    | 221.6449 | antifungal                                     |
| 206008 | A03 | C21H26N2O7    | 418.4506 | vasodilator                                    |
| 206008 | A04 | C6H4N2O6      | 200.1086 | catechol O-methyltransferase inhibitor         |
| 206008 | A05 | C22H26O5      | 370.4495 | estrogen                                       |
| 206008 | A06 | C21H27N7NaO17 | 765.3972 | cofactor in aryl & steroidal hydroxylation     |
| 206008 | A07 | C21H28ClNO3   | 377.9152 | antiarrhythmic                                 |
| 206008 | A08 | C29H42O10     | 550.6521 | cardiotonic                                    |
| 206008 | A09 | C16H12O5      | 284.271  | antibacterial, cathartic                       |
| 206008 | A10 | C15H21N3O3S   | 323.4169 | antidiabetic                                   |
| 206008 | A11 | C30H40O4      | 464.6509 | antineoplastic, antiinflammatory               |
| 206008 | B02 | C13H19NO2     | 221.3019 | antifungal                                     |
| 206008 | B03 | C42H69NaO11   | 773.0014 | antibacterial                                  |
| 206008 | B04 | C11H14ClF3N2  | 266.6958 | 5HT agonist                                    |
| 206008 | B05 | C38H72N2O12   | 749.0037 | antibacterial                                  |
| 206008 | B06 | C47H51NO14    | 853.9288 | antineoplastic                                 |
| 206008 | B07 | C21H23N3OS    | 365.501  | antipsychotic                                  |
| 206008 | B08 | C15H10O5      | 270.244  | antiviral (HIV)                                |
| 206008 | B09 | C42H38O20     | 862.7592 | cathartic                                      |
| 206008 | B10 | C12H21ClO2    | 232.753  | arthropod pheromone                            |
| 206008 | B11 | C38H42N2O6    | 622.7682 | analgesic, antineoplastic, antihypertensive,   |
| 206008 | C02 | C7H10N4O4     | 214.1822 | antineoplastic, hypoxic cell radiosensitizer   |
| 206008 | C03 | C8H11N5O3     | 225.2086 | antiviral                                      |
| 206008 | C04 | C10H10N2O     | 174.204  | antioxidant, lipoxygenase inhibitor            |
| 206008 | C05 | C35H44O16     | 720.7313 | antifeedant, insecticide                       |
| 206008 | C06 | C18H30N2O2    | 306.452  | anesthetic (local)                             |
| 206008 | C07 | C7H22Cl3N3    | 254.6325 | ornithine decarboxylase inhibitor              |
| 206008 | C08 | C30H30O8      | 518.5688 | antispermatogenic, antineoplastic, antiHIV     |
| 206008 | C09 | C23H26O3      | 350.4619 | ectoparasiticide                               |
| 206008 | C10 | C14H13N3O4S2  | 351.4054 | antiinflammatory                               |
| 206008 | C11 | C15H12O4      | 256.2605 | aldose reductase inhibitor, antineoplastic,    |
| 206008 | D02 | C9H13N3O6     | 259.2205 | immunosuppressant                              |
| 206008 | D03 | C18H20N2O6    | 360.3699 | antihypertensive                               |
| 206008 | D04 | C24H28N2O4S2  | 472.6298 | 5HT1&2 receptor antagonist                     |
| 206008 | D05 | C32H49NO9     | 591.7486 | antihypertensive                               |
| 206008 | D06 | C10H12N2      | 160.2205 | psychotropic                                   |
| 206008 | D07 | C24H36O5      | 404.5515 | antihyperlipidemic, HMGCoA reductase inhibitor |
| 206008 | D08 | C10H19NO      | 169.269  | antifeedant, antiinflammatory, oxytoxic        |
| 206008 | D09 | C22H30N6O4S   | 474.5862 | impotency therapy                              |
| 206008 | D10 | C9H13ClN6O2   | 272.696  | antineoplastic                                 |
| 206008 | D11 | C24H37NO7     | 451.565  | antiarrhythmic                                 |
| 206008 | E02 | C26H35NO7     | 473.5714 | vasodilator                                    |
| 206008 | E03 | C17H18FN3O3   | 331.3497 | antibacterial, fungicide                       |
| 206008 | E04 | C21H27ClN2O3  | 390.9139 | alpha2 adrenergic antagonist                   |
| 206008 | E05 | C16H18ClNO6S2 | 419.906  | platelet aggregation inhibitor                 |
| 206008 | E06 | C11H12I3NO2   | 570.937  | radioopaque agent                              |
| 206008 | E07 | CH6ClNO       | 83.51807 | hydroxymethyltransferase inhibitor             |
| 206008 | E08 | C11H15NO2     | 193.2477 | antihypertensive, antihistamine                |
| 206008 | E09 | C8Cl4N2       | 265.9146 | antifungal                                     |
| 206008 | E10 | C15H12O4      | 256.2605 | antiinflammatory                               |
| 206008 | E11 | C3H5NO4       | 119.0776 | antineoplastic                                 |
| 206008 | F02 | C10H18ClN3O2  | 247.7269 | antineoplastic                                 |

Lee et al Supplemental Table 1

|        |     |               |          |                                                    |
|--------|-----|---------------|----------|----------------------------------------------------|
| 206008 | F03 | C10H10O2      | 162.19   | anesthetic (topical) and antiseptic, pediculicide  |
| 206008 | F04 | C8H12CIN5     | 213.6713 | 5HT3 receptor agonist                              |
| 206008 | F05 | C22H23CIN2O2  | 382.8938 | H1 antihistamine                                   |
| 206008 | F06 | C16H14F3N3O2S | 369.3681 | antiulcerative                                     |
| 206008 | F07 | C5H16N4O4S    | 228.2717 | NMDA blocker, alpha-2 adrenergic agonist; NO       |
| 206008 | F08 | C11H14N2O     | 190.247  | antiinflammatory, respiratory stimulant            |
| 206008 | F09 | C12H20O3      | 212.2914 | plant growth regulator                             |
| 206008 | F10 | C17H27NO2     | 277.4102 | antidepressant                                     |
| 206008 | F11 | C22H19CIO3    | 366.8479 | antipneumocystic, antimalarial                     |
| 206008 | G02 | C43H74N2O14   | 843.0742 | antibacterial                                      |
| 206008 | G03 | C16H22N2O5    | 322.3641 | muscarinic agonist                                 |
| 206008 | G04 | C37H53NO12    | 703.8345 | antihypertensive                                   |
| 206008 | G05 | C43H63NO11    | 769.9817 | antiparasitic, antimite                            |
| 206008 | G06 | C20H29CIN2O3  | 380.9187 | anticholinergic                                    |
| 206008 | G07 | C4H4N2OS      | 128.1533 | thyroid depressant                                 |
| 206008 | G08 | C15H8O7       | 300.2268 | cathartic, purgative                               |
| 206008 | G09 | C76H52O46     | 1701.234 | nonspecific enzyme/receptor blocker                |
| 206008 | G10 | C13H19CI2NO   | 276.2085 | antidepressant                                     |
| 206008 | G11 | C11H17CI2N5   | 290.1976 | antimalarial                                       |
| 206008 | H02 | C8H8O3        | 152.1512 | antiseborrheic, antipruritic                       |
| 206008 | H03 | C16H22CI2N2O2 | 377.3359 | calmodulin antagonist, PDE and kinase inhibitor    |
| 206008 | H04 | C17H14F3N3O2S | 381.3792 | antiarthritic, cyclooxygenase2 inhibitor           |
| 206008 | H05 | C33H33CaFNO5  | 582.7131 | antihyperlipidemic, HMGCoA reductase inhibitor     |
| 206008 | H06 | C23H42N2O12   | 538.5974 | antihypertensive, ganglionic blocker               |
| 206008 | H07 | C24H28CIN3O6  | 489.9603 | antiemetic, antispasmodic                          |
| 206008 | H08 | C29H46O3      | 442.6882 | antineoplastic                                     |
| 206008 | H09 | C20H28O2      | 300.445  | antineoplastic, aromatase inhibitor                |
| 206008 | H10 | C21H25NO4     | 355.4377 | analgesic, hypnotic, papaverine-like               |
| 206008 | H11 | C6CI4O2       | 245.8777 | antipsoriatic                                      |
| 206009 | A02 | C6H9NO5       | 175.1423 | analeptic, neurostimulant                          |
| 206009 | A03 | C8H4CI2N2O2   | 231.0393 | NMDA receptor antagonist (gly)                     |
| 206009 | A04 | C18H20FN3O4   | 361.3762 | antibacterial                                      |
| 206009 | A05 | C23H29CIFN3O4 | 465.9567 | antibacterial                                      |
| 206009 | A06 | C17H25N3O2S   | 335.4717 | 5HT 1B/2D receptor agonist                         |
| 206009 | A07 | C22H28FN3O6S  | 481.5474 | antihyperlipidemic                                 |
| 206009 | A08 | C33H42O19     | 742.6913 | vasoprotectant                                     |
| 206009 | A09 | C15H18N2O     | 242.3235 | anticholinesterase, cognition enhancer             |
| 206009 | A10 | C13H17NO      | 203.2865 | antipruritic, scabicide                            |
| 206009 | A11 | C19H23N3      | 293.4153 | pesticide, carcinogen                              |
| 206009 | B02 | C12H18CIN7O   | 311.7766 | Na/H+ antiporter inhibitor, diuretic               |
| 206009 | B03 | C17H14O4S     | 314.3627 | COX2 inhibitor, antiinflammatory, antiarthritic    |
| 206009 | B04 | C33H34N6O6    | 610.6755 | angiotensin 1 receptor antagonist                  |
| 206009 | B05 | C19H21CIN2O3S | 392.9078 | antidiabetic                                       |
| 206009 | B06 | C29H30N6O6    | 558.5991 | Angiotensin II inhibitor prodrug, antihypertensive |
| 206009 | B07 | C20H27N5O5    | 417.4687 | 5HT4 receptor agonist, peristaltic stimulant       |
| 206009 | B08 | C22H34O3      | 346.5145 | cytotoxic, apoptosis inducer, antitubercular       |
| 206009 | B09 | C25H22O10     | 482.4481 | hepatoprotective agent, antioxidant                |
| 206009 | B10 | C17H10O       | 230.2687 | hepatotoxic, P450 suppressant                      |
| 206009 | B11 | C14H8O5       | 256.2169 | xanthin oxidase inhibitor, irritant                |
| 206009 | C02 | C7H5CIN2O     | 168.5837 | muscle relaxant, antirrhematic                     |
| 206009 | C03 | C6H6O2        | 110.1135 | antioxidant                                        |

Lee et al Supplemental Table 1

|        |     |               |          |                                                     |
|--------|-----|---------------|----------|-----------------------------------------------------|
| 206009 | C04 | C18H19N3O3S   | 357.4344 | antidiabetic                                        |
| 206009 | C05 | C22H22O8      | 414.4158 | antineoplastic; 10% cytotoxicity of podophyllotoxin |
| 206009 | C06 | C15H14N4O6S2  | 410.43   | antibacterial                                       |
| 206009 | C07 | C17H14F3N3O3S | 397.3786 | antiinflammatory, antiarthritic, COX-2 inhibitor    |
| 206009 | C08 | C22H28O3      | 340.4667 | aldosterone antagonist; antifibrogenic              |
| 206009 | C09 | C33H40O15     | 676.6778 | hepatoprotective                                    |
| 206009 | C10 | C16H21N3O2    | 287.3647 | antimigraine, 5HT[1B/1D] agonist                    |
| 206009 | C11 | C20H44N4O18S2 | 692.7177 | antibacterial                                       |
| 206009 | D02 | C25H28N2O2    | 388.5141 | antifungal                                          |
| 206009 | D03 | C15H12N2O2    | 252.2751 | antipsychotic                                       |
| 206009 | D04 | C22H23ClN6O   | 422.9212 | antihypertensive, AT1 angiotensin II antagonist     |
| 206009 | D05 | C13H22O3      | 226.3185 | plant growth regulator                              |
| 206009 | D06 | C14H13N5O5S2  | 395.4182 | antibacterial                                       |
| 206009 | D07 | C20H27N5O2    | 369.4705 | phosphodiesterase inhibitor                         |
| 206009 | D08 | C21H41N5O11   | 539.5878 | antibacterial; LD50(iv) 280mg/kg(mouse)             |
| 206009 | D09 | C17H18Cl3N    | 342.6987 | antidepressant, 5HT uptake inhibitor                |
| 206009 | D10 | C6H10S        | 114.2106 | antibacterial, antifungal, antineoplastic,          |
| 206009 | D11 | C7H11N3O3     | 185.184  | antiameobic, antitrichomonas                        |
| 206009 | E02 | C10H11NaO2    | 186.1878 | antihyperlipidemic                                  |
| 206009 | E03 | C10H11NO3     | 193.2041 | sweetener                                           |
| 206009 | E04 | C19H22FN3O4   | 375.4033 | antibacterial                                       |
| 206009 | E05 | C24H29ClN2O5  | 460.9621 | ACE inhibitor, antihypertensive                     |
| 206009 | E06 | C24H28N5NaO3  | 457.5123 | Angiotensin II inhibitor, antihypertensive          |
| 206009 | E07 | C17H32O3      | 284.4428 | antibacterial, antifungal                           |
| 206009 | E08 | C30H48O6      | 504.7135 | wound healing                                       |
| 206009 | E09 | C19H27N5O4    | 389.4581 | alpha(1)-adrenergic blocker                         |
| 206009 | E10 | C11H10N4O4    | 262.2268 | antibacterial                                       |
| 206009 | E11 | C18H24FN3O6S  | 429.4709 | antibacterial, antiproliferative                    |
| 206009 | F02 | C27H44O7      | 480.6475 | insect molting hormone                              |
| 206009 | F03 | C28H32N2O10   | 556.5746 | betaadrenergic blocker                              |
| 206009 | F04 | C8H17NO5      | 207.2284 | alpha-glucosidase inhibitor, antidiabetic           |
| 206009 | F05 | C14H19N5O4    | 321.3386 | antiviral                                           |
| 206009 | F06 | C17H27Cl2N    | 316.3174 | anorexic, antidepressant, uptake inhibitor (5HT,    |
| 206009 | F07 | C19H32O4      | 324.4645 | antibacterial, antifungal                           |
| 206009 | F08 | C10H11ClN4O2  | 254.6778 | nicotinyl AChR agonist; antiparasitic               |
| 206009 | F09 | C24H34N2O5    | 430.549  | antihypertensive, ACE inhibitor                     |
| 206009 | F10 | C15H13N3O3S   | 315.3532 | anthelmintic                                        |
| 206009 | F11 | C14H18N2O5    | 294.31   | sweetener                                           |
| 206009 | G02 | C12H15NO3     | 221.2583 | muscle relaxant (skeletal)                          |
| 206009 | G03 | C19H27NO3     | 317.4319 | antidiabetic                                        |
| 206009 | G04 | C29H53NO5     | 495.7495 | reversible lipase inhibitor, antiobesity            |
| 206009 | G05 | C26H31ClN2O8S | 567.0626 | Ca channel blocker                                  |
| 206009 | G06 | C16H20N4O3S   | 348.4268 | diuretic, inhibits Na/K/2Cl carrier system          |
| 206009 | G07 | C15H27IN2     | 362.3002 | oxytocic                                            |
| 206009 | G08 | C21H22NO5     | 368.4132 | uterine contractant, antibacterial, antiarrhythmic, |
| 206009 | G09 | C44H65N5O10   | 824.0362 | antibacterial                                       |
| 206009 | G10 | C10H16O       | 152.2384 | antineoplastic, apoptosis inducer; skin irritant,   |
| 206009 | G11 | C14H16ClN3O2  | 293.7555 | antifungal, P450 inhibitor                          |
| 206009 | H02 | C38H69NO13    | 747.9725 | antibacterial                                       |
| 206009 | H03 | C25H28N6O     | 428.5415 | angiotensin 2 receptor antagonist                   |
| 206009 | H04 | C16H14N2O3S   | 314.3656 | antiinflammatory, COX-2 inhibitor                   |

Lee et al Supplemental Table 1

|        |     |               |          |                                                      |
|--------|-----|---------------|----------|------------------------------------------------------|
| 206009 | H05 | C24H21F2NO3   | 409.4367 | sterol absorption inhibitor                          |
| 206009 | H06 | C23H43N3O5    | 441.6163 | antihypertensive, ACE inhibitor                      |
| 206009 | H07 | C14H26N4O11P2 | 488.3311 | cognition enhancer, phosphocholine                   |
| 206009 | H08 | C19H23NO4     | 329.3995 | weak abortifacient, immunosuppressant, analgesic,    |
| 206009 | H09 | C18H15NO3     | 293.3252 | antiinflammatory                                     |
| 206009 | H10 | C10H14N4O2    | 222.2487 | phosphodiesterase inhibitor                          |
| 206009 | H11 | C34H28CuN4Na2 | 682.1517 | antineoplastic                                       |
| 206010 | A02 | C22H18N2      | 310.4022 | antifungal, calmodulin antagonist                    |
| 206010 | A03 | C9H9NO        | 147.1782 | antineoplastic                                       |
| 206010 | A04 | C17H14N2      | 246.3145 | apoptosis inducer                                    |
| 206010 | A05 | C7H5N3O2      | 163.1368 | NO synthetase inhibitor                              |
| 206010 | A06 | C23H35NaO7    | 446.521  | antihyperlipidemic, HMGCoA reductase inhibitor       |
| 206010 | A07 | C40H56O3      | 584.8905 | antineoplastic                                       |
| 206010 | A08 | C28H31FN4O    | 458.5839 | H1 antihistamine (nonsedating)                       |
| 206010 | A09 | C23H28CIN3O5S | 494.0137 | antihyperglycemic                                    |
| 206010 | A10 | C10H6O3       | 174.1575 | antineoplastic, antifungal                           |
| 206010 | A11 | C10H12O4      | 196.2047 | insect attractant, plant hormone                     |
| 206010 | B02 | C15H12O2      | 224.2617 | antineoplastic                                       |
| 206010 | B03 | C43H51N3O11   | 785.8994 | antibacterial, RNA synthesis inhibitor               |
| 206010 | B04 | C19H22FN3O    | 327.4051 | tranquilizer, neuroleptic, alpha adrenergic blocker  |
| 206010 | B05 | C17H20N4O6    | 376.3722 | Vitamin B2; Vitamin cofactor; LD50(rat) 560 mg/kg ip |
| 206010 | B06 | C23H30O11     | 482.489  | antiinflammatory, antispasmodic, antihypertensive,   |
| 206010 | B07 | C21H23NO6     | 385.4206 | antimitotic                                          |
| 206010 | B08 | C11H19NO9     | 309.2754 | immunomodulator, adjuvant                            |
| 206010 | B09 | C18H26N2O12   | 462.4141 | nicotinyl acetylcholine receptor agonist,            |
| 206010 | B10 | C17H23NO4     | 305.3772 | anticholinergic, antispasmodic                       |
| 206010 | B11 | C25H24O6      | 420.4664 | antioxidant                                          |
| 206010 | C02 | C46H77NO17    | 916.1231 | antibacterial                                        |
| 206010 | C03 | C37H38N2O6    | 606.7252 | antineoplastic, hepatoprotectant, radioprotective    |
| 206010 | C04 | C18H17NO5     | 327.3399 | antiallergic, mast cell degranulation inhibitor,     |
| 206010 | C05 | C21H20O6      | 368.39   | antiedemic, antiinflammatory, bile stimulant;        |
| 206010 | C06 | C12H19Cl2N    | 248.1979 | inhibits dopamine & norepinephrine accumulation in   |
| 206010 | C07 | C6H6O4        | 142.1123 | chelator, antibacterial, skin whitening agent        |
| 206010 | C08 | C17H26CINO    | 295.8559 | acetylcholine transport blocker (vesicular)          |
| 206010 | C09 | C6H6N4O2      | 166.1403 | diuretic, adenosine antagonist                       |
| 206010 | C10 | C19H14O5      | 322.3204 | antiinflammatory, antimicrobial                      |
| 206010 | C11 | C29H38O4      | 450.6238 | antineoplastic, antiinflammatory, NO synthesis       |
| 206010 | D02 | C20H18CIF2N3O | 421.8346 | antibacterial                                        |
| 206010 | D03 | C7H10N2O2S    | 186.234  | antithyroid                                          |
| 206010 | D04 | C13H15NO2     | 217.27   | GABAA receptor blocker, CNS stimulant                |
| 206010 | D05 | C8H5F3N2OS    | 234.2011 | anticonvulsant, glutamate release inhibitor          |
| 206010 | D06 | C8H17NO2      | 159.2302 | anticonvulsant                                       |
| 206010 | D07 | C10H14N4O2    | 222.2487 | phosphodiesterase inhibitor                          |
| 206010 | D08 | C11H15CIN2O   | 226.708  | 5HT agonist                                          |
| 206010 | D09 | C6H11NO2      | 129.1601 | GABA uptake inhibitor                                |
| 206010 | D10 | C18H16O7      | 344.324  | antibacterial                                        |
| 206010 | D11 | C23H22O6      | 394.4282 | antineoplastic, antiviral, insecticide               |
| 206010 | E02 | C6H7N3O       | 137.1422 | antineoplastic, apoptosis inducer                    |
| 206010 | E03 | C23H29ClO4    | 404.9382 | progesterin, antiandrogen                            |
| 206010 | E04 | C12H14O4      | 222.243  | COX-1 inhibitor                                      |
| 206010 | E05 | C25H28N6O7S3  | 620.7299 | antibacterial                                        |

Lee et al Supplemental Table 1

|        |     |               |          |                                                     |
|--------|-----|---------------|----------|-----------------------------------------------------|
| 206010 | E06 | C15H24O       | 220.3579 | antioxidant                                         |
| 206010 | E07 | C17H27NO3     | 293.4096 | analgesic (topical), depletes Substance P           |
| 206010 | E08 | C17H18N2O5    | 330.3434 | cholinesterase inhibitor, antiparkinsonian          |
| 206010 | E09 | C6H10N4       | 138.1734 | analeptic, circulation stimulant                    |
| 206010 | E10 | C21H24O10     | 436.4194 | induces experimental glucosuria, antifeedant        |
| 206010 | E11 | C22H20O9      | 428.3993 | coccidiostat                                        |
| 206010 | F02 | C9H12N2S      | 180.2734 | antibacterial                                       |
| 206010 | F03 | C21H20O8      | 400.3888 | antineoplastic                                      |
| 206010 | F04 | C23H48NO4P    | 433.6171 | antineoplastic                                      |
| 206010 | F05 | C15H15NO2S    | 273.3563 | analeptic                                           |
| 206010 | F06 | C48H76N2O4S   | 777.2159 | antilepreitic                                       |
| 206010 | F07 | C10H15NO4     | 213.2354 | glutamate receptor agonist, anthelmintic            |
| 206010 | F08 | C13H15CIN2    | 234.7309 | anticholinesterase, K channel blocker               |
| 206010 | F09 | C11H17CIN2O   | 228.7239 | 5HT1 receptor agonist                               |
| 206010 | F10 | C15H28N2O4S   | 332.4654 | oxytocic                                            |
| 206010 | F11 | C23H22O6      | 394.4282 | acaricide, ectoparasiticide, antineoplastic,        |
| 206010 | G02 | C11H16FN3O3   | 257.2669 | antineoplastic                                      |
| 206010 | G03 | C21H46NO4P    | 407.5789 | antineoplastic                                      |
| 206010 | G04 | C9H13NO       | 151.2101 | antiulcer                                           |
| 206010 | G05 | C12H21NO8S    | 339.3671 | anticonvulsant, antimigraine, GABA-A agonist,       |
| 206010 | G06 | C4H7N3O       | 113.1199 | metabolic enhancer                                  |
| 206010 | G07 | C22H22O8      | 414.4158 | antineoplastic, inhibits microtubule assembly, and  |
| 206010 | G08 | C7H8N2O2      | 152.154  | cholagogue                                          |
| 206010 | G09 | C21H30O5      | 362.4703 | glucocorticoid, antiinflammatory                    |
| 206010 | G10 | C33H40N2O9    | 608.6948 | antihypertensive                                    |
| 206010 | G11 | C38H44O8      | 628.7696 | antiinflammatory, cytotoxic, inhibits HeLa cells in |
| 206010 | H02 | C7H7Cl2NO     | 192.0459 | antiplatelet                                        |
| 206010 | H03 | C18H14Cl4N4O4 | 492.1487 | antifungal                                          |
| 206010 | H04 | C22H25Cl2N3O  | 418.3701 | H1 antihistamine (nonsedating); leucotriene         |
| 206010 | H05 | C19H24FN5O7S  | 485.4948 | antibacterial                                       |
| 206010 | H06 | C9H10O3       | 166.1783 | antibacterial                                       |
| 206010 | H07 | C10H16CINO    | 201.6981 | acetylcholinesterase inhibitor                      |
| 206010 | H08 | C9H11NO4      | 197.1923 | antiparkinsonian                                    |
| 206010 | H09 | C13H10O5      | 246.2217 | GABA receptor antagonist, phototoxin                |
| 206010 | H10 | C12H8O4       | 216.1952 | antipsoriatic, antiinflammatory                     |
| 206010 | H11 | C30H36CINO10  | 606.0751 | antibacterial, antineoplastic                       |
| 206011 | A02 | C15H25CIN2O2  | 300.8317 | anesthetic (local)                                  |
| 206011 | A03 | C5H6N2OS      | 142.1804 | antithyroid agent                                   |
| 206011 | A04 | C9H10N4O2S2   | 270.3337 | antibacterial                                       |
| 206011 | A05 | C19H14O3      | 290.3216 | diagnostic aid                                      |
| 206011 | A06 | C26H30CIN3O6  | 515.9985 | vasodilator                                         |
| 206011 | A07 | C12H10N2      | 182.2269 | acaricide                                           |
| 206011 | A08 | C13H17CIN2    | 236.7468 | adrenergic agonist, nasal decongestant              |
| 206011 | A09 | C19H20N2O3    | 324.3829 | antiinflammatory                                    |
| 206011 | A10 | C23H20N2O3S   | 404.4915 | uricosuric                                          |
| 206011 | A11 | C18H29CIN2O4  | 372.8958 | antihypertensive, antianginal, antiarrhythmic       |
| 206011 | B02 | C26H28Cl2F2N2 | 477.4293 | vasodilator                                         |
| 206011 | B03 | C18H16Cl3N3O3 | 460.7695 | antifungal                                          |
| 206011 | B04 | C24H33FO6     | 436.5254 | antiinflammatory                                    |
| 206011 | B05 | C24H32N2O9    | 492.5306 | ACE inhibitor, antihypertensive                     |
| 206011 | B06 | C21H27CIN2S2  | 407.0437 | antipsychotic                                       |

Lee et al Supplemental Table 1

|        |     |               |          |                                                         |
|--------|-----|---------------|----------|---------------------------------------------------------|
| 206011 | B07 | C7H10N2OS     | 170.2346 | antihyperthyroid                                        |
| 206011 | B08 | C11H13N3O3S   | 267.3086 | antibacterial                                           |
| 206011 | B09 | C13H16N2O2    | 232.2847 | sleep induction, modifies circadian rhythm              |
| 206011 | B10 | C11H11F3N2O3  | 276.2171 | antiandrogen                                            |
| 206011 | B11 | C17H22CINO3   | 323.8228 | muscle relaxant (smooth)                                |
| 206011 | C02 | C22H28O4      | 356.4661 | estrogen                                                |
| 206011 | C03 | C15H16N7NaO5S | 493.5205 | antibacterial                                           |
| 206011 | C04 | C23H29N3O2S2  | 443.6345 | antipsychotic                                           |
| 206011 | C05 | C5H5N3O       | 123.1151 | antibacterial, tuberculostatic                          |
| 206011 | C06 | C11H13N3O     | 203.2458 | antipyretic, analgesic                                  |
| 206011 | C07 | C13H14N2O3    | 246.2681 | antidepressant                                          |
| 206011 | C08 | C15H14O3S     | 274.341  | antiinflammatory                                        |
| 206011 | C09 | C19H17CIN2O4  | 372.8113 | analgesic                                               |
| 206011 | C10 | C15H23N3O4S   | 341.4323 | dopamine receptor antagonist, antipsychotic             |
| 206011 | C11 | C18H16Cl3N3O4 | 444.7049 | antifungal                                              |
| 206011 | D02 | C25H26N9NaO8S | 667.6593 | antibacterial                                           |
| 206011 | D03 | C10H13CIN2    | 196.6815 | adrenergic blocker                                      |
| 206011 | D04 | C49H43N3O6    | 769.9056 | anthelmintic                                            |
| 206011 | D05 | C21H26N2O3    | 354.453  | vasodilator                                             |
| 206011 | D06 | C7H11NO5      | 189.1694 | excitatory aminoacid                                    |
| 206011 | D07 | C13H10N2      | 194.2381 | local antiseptic                                        |
| 206011 | D08 | C24H30CINO4   | 431.964  | antispasmodic                                           |
| 206011 | D09 | C23H26FN3O2   | 395.481  | antipsychotic                                           |
| 206011 | D10 | C24H31FO6     | 434.5095 | antiinflammatory                                        |
| 206011 | D11 | C43H72O11     | 765.0467 | antibacterial, antiviral                                |
| 206011 | E02 | C15H14NNaO3   | 279.2735 | antiinflammatory                                        |
| 206011 | E03 | C7H7NO2       | 137.1393 | analgesic                                               |
| 206011 | E04 | C4H9NO2       | 103.1218 | antihypertensive                                        |
| 206011 | E05 | C8H15NO6      | 221.2119 | antiarthritic                                           |
| 206011 | E06 | C22H22FN3O2   | 379.4379 | neuroleptic                                             |
| 206011 | E07 | C11H12N4O3S   | 280.3073 | antibacterial                                           |
| 206011 | E08 | C13H9NOSe     | 274.1828 | antioxidant, lipoxigenase inhibitor, inhibits oxidation |
| 206011 | E09 | C7H12N2O4S    | 220.2487 | muscle relaxant (smooth)                                |
| 206011 | E10 | C21H27FO6     | 394.4441 | glucocorticoid                                          |
| 206011 | E11 | C13H12N2O3S   | 276.3162 | antibacterial                                           |
| 206011 | F02 | C14H8O6       | 272.2163 | antiviral, HIV-1 integrase inhibitor                    |
| 206011 | F03 | C25H34O6      | 430.5461 | antiinflammatory                                        |
| 206011 | F04 | C14H10F3NO2   | 281.2365 | antiinflammatory, analgesic                             |
| 206011 | F05 | C11H12N4O3S   | 280.3073 | antibacterial                                           |
| 206011 | F06 | C15H10NNaO3   | 275.2417 | thromboxane synthetase inhibitor                        |
| 206011 | F07 | C9H4Cl2N2O3   | 259.0498 | NMDA and kainate receptor antagonist                    |
| 206011 | F08 | C10H18O       | 154.2544 | anthelmintic, antiseptic, expectorant                   |
| 206011 | F09 | C22H25CIN2O8  | 480.9062 | antibacterial                                           |
| 206011 | F10 | C34H47NO11    | 645.7538 | anesthetic (gastric), antipyretic, and cardiotoxin      |
| 206011 | F11 | C22H22CINO4   | 399.8779 | cytostatic, intercalating agent                         |
| 206011 | G02 | C7H6O4        | 154.1235 | antibacterial                                           |
| 206011 | G03 | C7H5NO3S      | 183.1868 | sweetener                                               |
| 206011 | G04 | C12H16N2S     | 220.3387 | analgesic                                               |
| 206011 | G05 | C8H16CINO4    | 225.674  | cholinergic                                             |
| 206011 | G06 | C9H6FNO2      | 179.1521 | NMDA receptor antagonist (gly)                          |
| 206011 | G07 | C7H17CIN4O2   | 224.6921 | NO synthase inhibitor                                   |

Lee et al Supplemental Table 1

|        |     |               |          |                                                  |
|--------|-----|---------------|----------|--------------------------------------------------|
| 206011 | G08 | C15H25ClN2O4S | 364.8945 | neuroleptic                                      |
| 206011 | G09 | C6H9NO2S      | 159.2081 | hepatoprotectant                                 |
| 206011 | G10 | C5H8N4O3S2    | 236.2725 | carbonic anhydrase inhibitor                     |
| 206011 | G11 | C12H30Br2N2   | 362.1943 | antihypertensive, ganglionic blocker             |
| 206011 | H02 | C14H20ClN3O   | 281.788  | analgesic, antipyretic, antiinflammatory         |
| 206011 | H03 | C21H26ClN3OS  | 403.9779 | antipsychotic                                    |
| 206011 | H04 | C10H16ClNO3   | 233.6969 | bronchodilator                                   |
| 206011 | H05 | C18H16O8      | 360.3234 | antiinflammatory, antithrombotic, antiplatelet,  |
| 206011 | H06 | C20H27NO11    | 457.4383 | antiinflammatory, experimental antineoplastic    |
| 206011 | H07 | C20H22N5NaO6S | 483.482  | antibacterial                                    |
| 206011 | H08 | C20H22ClN     | 311.858  | muscle relaxant (skeletal)                       |
| 206011 | H09 | C28H44ClNO2   | 462.1214 | antiinfectant                                    |
| 206011 | H10 | C13H16N3NaO4S | 333.344  | analgesic, antipyretic                           |
| 206011 | H11 | C19H24ClNO5   | 381.8598 | alpha1a adrenergic blocker                       |
| 206012 | A02 | C40H67NaO11   | 746.9632 | antibacterial                                    |
| 206012 | A03 | C8H14O2S2     | 206.3276 | hepatoprotectant                                 |
| 206012 | A04 | C32H32O13S    | 656.668  | antineoplastic                                   |
| 206012 | A05 | H6Cl2N2Pt     | 300.0572 | antineoplastic, convulsant                       |
| 206012 | A06 | C15H14F3N3O4S | 421.4197 | diuretic                                         |
| 206012 | A07 | C15H17FN4O3   | 320.3261 | antibacterial                                    |
| 206012 | A08 | C12H19ClN2O4  | 290.7492 | antihypertensive, vasoconstrictor                |
| 206012 | A09 | C15H16O2      | 228.2936 | antiinflammatory                                 |
| 206012 | A10 | C25H32ClFO5   | 466.9822 | glucocorticoid, antiinflammatory                 |
| 206012 | A11 | C2H7AsO2      | 137.9985 | antieczema, dermatologic, herbicide              |
| 206012 | B02 | C42H78N2O14   | 835.095  | antibacterial                                    |
| 206012 | B03 | C10H13N5O4    | 267.2462 | RT transferase inhibitor, antiviral              |
| 206012 | B04 | C7H5ClN2O3    | 200.5825 | antiprotozoal, coccidiostat                      |
| 206012 | B05 | C14H21Br2ClN2 | 412.5979 | expectorant                                      |
| 206012 | B06 | C21H28O2      | 312.4561 | progestogen                                      |
| 206012 | B07 | C17H27NO4     | 309.409  | betaadrenergic blocker                           |
| 206012 | B08 | C9H11NO2      | 165.1935 | antidepressant                                   |
| 206012 | B09 | C19H29NaO5S   | 392.4938 | menstrual regulation                             |
| 206012 | B10 | C20H25Cl2NO   | 366.3344 | antitussive                                      |
| 206012 | B11 | C12H19Cl2NO   | 264.1973 | bronchodilator, beta adrenergic agonist          |
| 206012 | C02 | C15H23Cl2NO   | 282.8164 | anesthetic (local)                               |
| 206012 | C03 | C6H13N5O4     | 219.2016 | NO synthase inhibitor                            |
| 206012 | C04 | C18H24N5O8P   | 469.3945 | vasodilator                                      |
| 206012 | C05 | C14H22BrN3O2  | 344.2543 | antiemetic                                       |
| 206012 | C06 | C20H22Cl2N2O4 | 425.3153 | psychostimulant                                  |
| 206012 | C07 | C20H23NO4     | 341.4106 | morphine antagonist                              |
| 206012 | C08 | C36H60O2      | 524.8784 | provitamin, antixerophthalmic                    |
| 206012 | C09 | C14H16O2      | 216.2824 | antiinflammatory, analgesic, antipyretic         |
| 206012 | C10 | C22H27ClO3    | 374.9117 | antiandrogen                                     |
| 206012 | C11 | C18H28ClN3O5S | 433.958  | antimalarial, lupus suppressant                  |
| 206012 | D02 | C12H10F3N3O4  | 317.2264 | antiandrogen                                     |
| 206012 | D03 | C9H10ClNO2    | 199.6386 | Irreversible inhibitor of tryptophan hydroxylase |
| 206012 | D04 | C21H29NO4S    | 391.5336 | anticholinergic                                  |
| 206012 | D05 | C22H26N2O2    | 350.4647 | cerebral vasodilator, antimotion                 |
| 206012 | D06 | C23H39NO4     | 393.5716 | coronary vasodilator                             |
| 206012 | D07 | C20H22N2O4    | 354.4093 | antidepressant, dopamine uptake inhibitor        |
| 206012 | D08 | C22H40ClN     | 354.0238 | antiinfective (topical)                          |



Lee et al Supplemental Table 1

|        |     |               |          |                                                        |
|--------|-----|---------------|----------|--------------------------------------------------------|
| 206012 | D09 | C28H35FO7     | 502.5854 | glucocorticoid, antiinflammatory                       |
| 206012 | D10 | C19H24N2O6    | 376.4129 | antiinflammatory                                       |
| 206012 | D11 | C20H23BrN2O4  | 435.3213 | H1 antihistamine                                       |
| 206012 | E02 | C17H27N5O6    | 397.4346 | analgesic                                              |
| 206012 | E03 | C14H28CINO6   | 341.8354 | immunomodulator, antiinflammatory                      |
| 206012 | E04 | C24H30N2O4    | 410.5177 | antidepressant                                         |
| 206012 | E05 | C14H20CIN3S   | 297.8526 | H1 antihistamine                                       |
| 206012 | E06 | C8H8O4        | 168.1506 | antineoplastic, protein phosphatase inhibitor          |
| 206012 | E07 | C13H21CIN2O   | 256.7781 | anesthetic (local)                                     |
| 206012 | E08 | C13H18N4O3    | 278.3134 | vasodilator                                            |
| 206012 | E09 | C18H29CIN2O   | 324.8976 | anesthetic (local)                                     |
| 206012 | E10 | C12H9F3N2O2   | 270.2129 | antineoplastic, PDGF receptor blocker                  |
| 206012 | E11 | C7H11NO2      | 141.1712 | anticonvulsant                                         |
| 206012 | F02 | C9H13NO2      | 167.2095 | hypnotic, sedative                                     |
| 206012 | F03 | C26H28N2      | 368.5265 | H1 antihistamine                                       |
| 206012 | F04 | C13H19NO8     | 317.2983 | antihypertensive                                       |
| 206012 | F05 | C41H76N2O15   | 837.0673 | antibacterial                                          |
| 206012 | F06 | C15H20CINO    | 265.7858 | beta adrenergic agonist, antiarrhythmic                |
| 206012 | F07 | C4H14Cl2N2S2  | 225.2036 | hepatoprotectant, radioprotectant                      |
| 206012 | F08 | C18H24N2O7S   | 412.4652 | anthelmintic                                           |
| 206012 | F09 | C20H22O3      | 310.3965 | sunscreen                                              |
| 206012 | F10 | C15H23NO4     | 281.3549 | protein synthesis inhibitor                            |
| 206012 | F11 | C16H16CIN3O3S | 365.8412 | diuretic, antihypertensive                             |
| 206012 | G02 | C19H24Cl2N2   | 351.3225 | antidepressant                                         |
| 206012 | G03 | C16H12O6      | 300.2704 | analgesic, antipyretic                                 |
| 206012 | G04 | C5H7CIN2O3    | 178.5761 | antineoplastic                                         |
| 206012 | G05 | C52H97NO18S   | 1056.413 | antibacterial                                          |
| 206012 | G06 | C9H13NO       | 151.2101 | decongestant                                           |
| 206012 | G07 | C11H12CINO3S  | 273.7402 | anxiolytic, muscle relaxant                            |
| 206012 | G08 | C10H13NO      | 163.2212 | antihyperlipidemic                                     |
| 206012 | G09 | C14H19NO4     | 265.3118 | antiprotozoal, antifungal, protein synthesis inhibitor |
| 206012 | G10 | C12H14N4O4S   | 310.3338 | antibacterial                                          |
| 206012 | G11 | C22H27CIN2O4S | 450.9885 | Ca channel blocker, coronary vasodilator               |
| 206012 | H02 | C16H24N4O2    | 304.3953 | A1 adenosine antagonist                                |
| 206012 | H03 | C17H19CIF3NO  | 345.7953 | antidepressant                                         |
| 206012 | H04 | C7H5NS2       | 167.2526 | antifungal                                             |
| 206012 | H05 | C21H27N3O5    | 401.4664 | antihistaminic                                         |
| 206012 | H06 | C7H10N4O2S    | 214.2474 | antibacterial                                          |
| 206012 | H07 | C7H8N4O2      | 180.1674 | adenosine receptor agonist                             |
| 206012 | H08 | C14H15NO4     | 261.28   | aldose reductase inhibitor                             |
| 206012 | H09 | C2H8CINS      | 113.6098 | depigmentation, radiation protectant                   |
| 206012 | H10 | C22H24CIN3O5  | 445.9067 | antipsychotic                                          |
| 206012 | H11 | C16H17N3O4S   | 347.3956 | antibacterial                                          |
| 206013 | A02 | C8H7CIN2O2S   | 230.6742 | antihypertensive, diuretic, activates K channels and   |
| 206013 | A03 | C25H29N3O2    | 403.5288 | analgesic, antipyretic                                 |
| 206013 | A04 | C6H6N4O2      | 166.1403 | phosphodiesterase inhibitor                            |
| 206013 | A05 | C22H22O8      | 414.4158 | antineoplastic, cytotoxic                              |
| 206013 | A06 | C29H34Cl2N2O2 | 513.5125 | Ca channel blocker                                     |
| 206013 | A07 | C12H16N4O2    | 248.2869 | A1 adenosine agonist                                   |
| 206013 | A08 | C17H16CIN3O   | 313.7896 | antidepressant, inhibits norepinephrine uptake         |
| 206013 | A09 | C5H10CINO3    | 167.5934 | antineoplastic                                         |

Lee et al Supplemental Table 1

|        |     |               |          |                                                      |
|--------|-----|---------------|----------|------------------------------------------------------|
| 206013 | A10 | C10H16O2      | 168.2378 | esters as insecticide                                |
| 206013 | A11 | C28H34O7      | 482.579  | antifeedant                                          |
| 206013 | B02 | C15H15NO2     | 241.2923 | antiinflammatory, analgesic                          |
| 206013 | B03 | C27H39CIN2O4  | 491.0759 | adrenegic blocker, Ca channel blocker, coronary      |
| 206013 | B04 | C25H30CII2NO3 | 681.7846 | adrenergic agonist, coronary vasodilator, Ca channel |
| 206013 | B05 | C12H17NO      | 191.2754 | insect repellent                                     |
| 206013 | B06 | C19H23CIN4O2S | 406.9378 | antiulcer, M1 muscarinic antagonist                  |
| 206013 | B07 | C16H22CINO2   | 295.8122 | antihypertensive, antianginal, antiarrhythmic        |
| 206013 | B08 | C14H21N3O3S   | 311.4058 | antidiabetic                                         |
| 206013 | B09 | C10H9CIN4O2S  | 284.7258 | antibacterial                                        |
| 206013 | B10 | C18H23CI2NO   | 340.2961 | alpha adrenergic blocker                             |
| 206013 | B11 | C22H34O7      | 410.5121 | adenylate cyclase activator, antiglaucoma,           |
| 206013 | C02 | C8H18CINO2    | 195.6912 | cholinergic, diagnostic aid                          |
| 206013 | C03 | C9H14CINO2    | 203.6704 | mydriatic, decongestant                              |
| 206013 | C04 | C12H14N2O2    | 218.2576 | anticonvulsant                                       |
| 206013 | C05 | C7H16CINO2    | 181.6641 | antiarrhythmic, miotic, vasodilator (peripheral)     |
| 206013 | C06 | C10H16CINO    | 201.6981 | bronchodilator, cardiac stimulant                    |
| 206013 | C07 | C17H19N2NaO6S | 402.4046 | antibacterial                                        |
| 206013 | C08 | C14H20N2O2    | 248.3277 | antihypertensive, antianginal, antiarrhythmic,       |
| 206013 | C09 | C13H19NO4S    | 285.3647 | uricosuric                                           |
| 206013 | C10 | C22H28O6      | 388.4649 | insecticide, antiamoebic                             |
| 206013 | C11 | C23H32CINO2   | 389.97   | cytochrome P450 inhibitor, Ca antagonist             |
| 206013 | D02 | C28H44O       | 396.6623 | antirachitic vitamin; LD50 (rat) 56 mg/kg po         |
| 206013 | D03 | C11H18CINO3   | 247.724  | alpha1 adrenoreceptor agonist, vasoconstrictor       |
| 206013 | D04 | C23H26N5NaO7S | 539.5468 | antibacterial                                        |
| 206013 | D05 | C13H22CIN3O   | 271.7928 | antiarrhythmic                                       |
| 206013 | D06 | C9H8O4        | 180.1617 | analgesic, antipyretic, antiinflammatory             |
| 206013 | D07 | C27H36F2O6    | 494.5812 | glucocorticoid, antiinflammatory                     |
| 206013 | D08 | C24H29N3O6    | 455.5152 | oxytocic                                             |
| 206013 | D09 | C15H13N3O4S   | 331.3526 | antiinflammatory                                     |
| 206013 | D10 | C19H30CINO    | 323.9101 | anticholinergic                                      |
| 206013 | D11 | C13H14O5      | 250.2535 | antibacterial                                        |
| 206013 | E02 | C31H52O3      | 472.7583 | vitamin E                                            |
| 206013 | E03 | C16H19N3O4S   | 349.4115 | antibacterial                                        |
| 206013 | E04 | C22H29FO4     | 376.4724 | glucocorticoid, antiinflammatory                     |
| 206013 | E05 | C22H30O5      | 374.4814 | glucocorticoid                                       |
| 206013 | E06 | C8H12CINO3    | 205.6427 | adrenergic agonist (ophthalmic)                      |
| 206013 | E07 | C21H30O2      | 314.4721 | progestogen                                          |
| 206013 | E08 | C18H20O2      | 268.3589 | estrogen                                             |
| 206013 | E09 | C25H34O8      | 462.5449 | glucocorticoid                                       |
| 206013 | E10 | C21H28O5      | 360.4543 | glucocorticoid                                       |
| 206013 | E11 | C15H10O5      | 270.244  | antispasmodic, antineoplastic, topoisomerase I       |
| 206013 | F02 | C15H21CIN2O2  | 296.7998 | antiinflammatory, bronchodilator                     |
| 206013 | F03 | C5H7NO3       | 129.1164 | anticonvulsant                                       |
| 206013 | F04 | C20H30BrNO3   | 412.371  | bronchodilator, antiarrhythmic                       |
| 206013 | F05 | C16H17KN2O5S  | 388.4903 | antibacterial                                        |
| 206013 | F06 | C23H30O6      | 402.492  | glucocorticoid                                       |
| 206013 | F07 | C32H37NO8     | 563.6536 | estrogen antagonist, antineoplastic                  |
| 206013 | F08 | C32H51NO13S   | 689.8262 | antihypertensive                                     |
| 206013 | F09 | C19H22CINO    | 315.8463 | antidepressant                                       |
| 206013 | F10 | C12H22O11     | 342.3025 | laxative                                             |

Lee et al Supplemental Table 1

|        |     |             |          |                                                   |
|--------|-----|-------------|----------|---------------------------------------------------|
| 206013 | F11 | C17H17ClO6  | 352.7744 | antifungal, inhibits mitosis in metaphase         |
| 206013 | G02 | C21H26O5    | 358.4384 | glucocorticoid                                    |
| 206013 | G03 | C12H21NO7S  | 323.3677 | betaadrenergic agonist, bronchodilator            |
| 206013 | G04 | C20H24N2O4  | 356.4253 | antihistaminic                                    |
| 206013 | G05 | C10H16ClNO  | 201.6981 | bronchodilator, decongestant                      |
| 206013 | G06 | C23H32O4    | 372.5091 | mineralocorticoid                                 |
| 206013 | G07 | C17H22N3O4P | 363.3564 | antihistaminic                                    |
| 206013 | G08 | C21H28N2O5  | 388.4677 | antihistaminic, hypnotic                          |
| 206013 | G09 | C30H44O9    | 548.6798 | cardiotonic                                       |
| 206013 | G10 | C42H33N3O6  | 675.7478 | anthelmintic, antischistosomal                    |
| 206013 | G11 | C11H8O2     | 172.1852 | prothrombogenic agent                             |
| 206013 | H02 | C3H4N2S     | 100.1427 | antithyroid agent                                 |
| 206013 | H03 | C12H12N2O3  | 232.241  | antibacterial                                     |
| 206013 | H04 | C6H9ClN2O2  | 176.6038 | GABAa agonist, GABA <sub>c</sub> antagonist       |
| 206013 | H05 | C22H29FO5   | 392.4718 | glucocorticoid                                    |
| 206013 | H06 | C22H17ClN2  | 344.8472 | antifungal                                        |
| 206013 | H07 | C47H79NO21  | 994.1478 | antifungal, antibacterial, antiinflammatory agent |
| 206013 | H08 | C22H32O2    | 328.4991 | vitamin precursor                                 |
| 206013 | H09 | C17H26ClNO3 | 327.8547 | anticholinergic (ophthalmic)                      |
| 206013 | H10 | C13H19N5    | 245.3299 | K channel agonist, antihypertensive               |
| 206013 | H11 | C13H18ClNO2 | 255.7469 | antidepressant                                    |

| <b>SOURCE</b>                                  |
|------------------------------------------------|
| synthetic                                      |
| semisynthetic                                  |
| synthetic                                      |
| synthetic                                      |
| provitamin A; widespread in plants and animals |
| synthetic                                      |
| semisynthetic                                  |
| synthetic                                      |
| Streptomyces nodosus                           |
| Bacillus licheniformis and B subtilis          |
| semisynthetic                                  |
| synthetic                                      |
| semisynthetic                                  |
| synthetic                                      |
| synthetic                                      |
| semisynthetic                                  |
| synthetic                                      |
| synthetic                                      |
| semisynthetic                                  |
| synthetic                                      |
| synthetic                                      |
| synthetic                                      |
| semisynthetic                                  |
| synthetic                                      |
| synthetic                                      |
| synthetic                                      |
| synthetic                                      |
| semisynthetic                                  |
| synthetic                                      |
| synthetic                                      |
| component of Madopa (Hoffmann-LaRoche)         |
| synthetic                                      |
| semisynthetic                                  |
| synthetic                                      |
| synthetic                                      |
| synthetic                                      |
| Colchicum autumnale                            |
| widespread in living tissue                    |
| synthetic                                      |
| semisynthetic                                  |
| synthetic                                      |
| synthetic                                      |
| Bacillus colistinus                            |

|                                        |
|----------------------------------------|
| Nicotiana tabacum                      |
| synthetic                              |
| Streptomyces venezuelae                |
| synthetic                              |
| semisynthetic; U-21251                 |
| synthetic                              |
| synthetic                              |
| synthetic                              |
| synthetic                              |
| Cofea, Theobroma, Camelia and Cola spp |
| semisynthetic                          |
| synthetic                              |
| Streptomyces aureofaciens              |
| synthetic                              |
| semisynthetic                          |
| synthetic                              |
| synthetic                              |
| Atropa and Datura spp                  |
| synthetic                              |
| Cinnamomum camphora                    |
| semisynthetic                          |
| synthetic                              |
| Streptomyces capreolis                 |
| synthetic                              |
| coal tar                               |
| synthetic                              |
| Strptomyces pilosus                    |
| synthetic                              |
| Streptomyces humidus                   |
| synthetic                              |
| pregnancy urine                        |
| synthetic                              |
| Fusidium spp                           |
| synthetic                              |
| semisynthetic                          |
| synthetic                              |
| semisynthetic                          |
| synthetic                              |
| synthetic                              |
| synthetic                              |
| semisynthetic                          |
| common in plant essential oils         |
| synthetic                              |
| synthetic                              |
| semisynthetic                          |
| synthetic                              |

|                                                    |
|----------------------------------------------------|
| Streptomyces aureofaiens                           |
| semisynthetic                                      |
| synthetic                                          |
| synthetic                                          |
| semisynthetic                                      |
| semisynthetic                                      |
| synthetic                                          |
| synthetic                                          |
| semisynthetic                                      |
| synthetic                                          |
| mammalian hormone                                  |
| semisynthetic                                      |
| Micromonospora spp                                 |
| semisynthetic                                      |
| semisynthetic                                      |
| Streptomyces spp                                   |
| semisynthetic                                      |
| synthetic                                          |
| synthetic                                          |
| synthetic                                          |
| pregnacy urine, dates and Punica granatum seeds    |
| synthetic                                          |
| semisynthetic                                      |
| synthetic                                          |
| synthetic                                          |
| Uragoga ipecacuanha                                |
| synthetic                                          |
| synthetic                                          |
| polysaccharides in bacteria, fungi, higher plants, |
| synthetic                                          |
| semisynthetic                                      |
| synthetic                                          |
| synthetic                                          |
| synthetic                                          |
| synthetic                                          |
| Portulaca grandiflora                              |
| semisynthetic                                      |
| NF-180; synthetic                                  |
| synthetic                                          |
| Claviceps purpurea, many plants and animals        |
| synthetic                                          |
| synthetic                                          |
| synthetic                                          |

|                                                      |
|------------------------------------------------------|
| Digitalis lanata or D. orientalis Lam.,              |
| synthetic                                            |
| ergot and Convolvulaceae spp                         |
| synthetic                                            |
| synthetic                                            |
| synthetic                                            |
| semisynthetic                                        |
| synthetic                                            |
| Digitalis spp                                        |
| synthetic                                            |
| synthetic                                            |
| semisynthetic                                        |
| synthetic                                            |
| semisynthetic                                        |
| Atropa, Datura and Hyoscyamus spp                    |
| synthetic                                            |
| Streptomyces lincolnensis, S espinosus, S variabilis |
| semisynthetic                                        |
| synthetic                                            |
| synthetic                                            |
| widespread in the plant and fungal kingdom           |
| synthetic                                            |
| semisynthetic                                        |
| Penicillium spp                                      |
| synthetic                                            |
| synthetic                                            |
| synthetic                                            |
| semisynthetic                                        |
| synthetic                                            |
| semisynthetic                                        |
| synthetic                                            |
| semisynthetic                                        |
| semisynthetic                                        |
| synthetic                                            |

|                                               |
|-----------------------------------------------|
| synthetic                                     |
| synthetic                                     |
| synthetic                                     |
| synthetic                                     |
| Corydalis cava and Papaver spp                |
| synthetic                                     |
| synthetic                                     |
| synthetic                                     |
| Streptomyces kanamyceticus                    |
| synthetic                                     |
| Streptomyces niveus and S griseus             |
| Streptomyces rimosus                          |
| synthetic                                     |
| Papaver somniferum, Rauwolfia serpentina      |
| synthetic                                     |
| Streptomyces fradiae                          |
| synthetic                                     |
| Streptomyces noursei                          |
| synthetic                                     |
| Physostigma venenosum                         |
| Pilocarpus spp                                |
| synthetic                                     |
| semisynthetic; L-5103, Ba-41166/E, NSC-113926 |
| synthetic                                     |
| synthetic                                     |
| synthetic                                     |
| synthetic                                     |
| many plants, animal protein                   |
| synthetic                                     |



|                                                                                                  |
|--------------------------------------------------------------------------------------------------|
| synthetic                                                                                        |
| Populus sieboldii                                                                                |
| synthetic                                                                                        |
| Streptomyces spp                                                                                 |
| synthetic                                                                                        |
| synthetic                                                                                        |
| Bacillus aneurinolyticus; mixture of gramicidins & striated muscle, liver; also in Pisum sativum |
| synthetic                                                                                        |
| synthetic                                                                                        |
| synthetic                                                                                        |
| Scopolia, Datura, Atropa spp                                                                     |
| synthetic                                                                                        |
| Camelia, thea, Paullinia cupana                                                                  |
| synthetic                                                                                        |
| synthetic                                                                                        |
| bear bile                                                                                        |
| synthetic                                                                                        |
| semisynthetic                                                                                    |
| synthetic                                                                                        |
| synthetic                                                                                        |
| Micromonospora myoensis                                                                          |
| synthetic                                                                                        |
| synthetic                                                                                        |
| semisynthetic                                                                                    |
| synthetic                                                                                        |
| Streptomyces orientalis                                                                          |
| synthetic                                                                                        |
| rancid fats and Lycopodium spp                                                                   |
| synthetic                                                                                        |
| Cinchona spp                                                                                     |
| Streptomyces spectabilis                                                                         |
| synthetic                                                                                        |
| synthetic                                                                                        |
| semisynthetic                                                                                    |
| synthetic                                                                                        |
| synthetic                                                                                        |
| synthetic                                                                                        |
| Camelia, Theobroma, Cola spp                                                                     |
| synthetic                                                                                        |
| Cinchona spp                                                                                     |
| synthetic                                                                                        |
| synthetic                                                                                        |
| synthetic                                                                                        |

|                                                      |
|------------------------------------------------------|
| semisynthetic                                        |
| synthetic                                            |
| synthetic                                            |
| synthetic                                            |
| Rauwolfia spp., Melodinus balansae, Tonduzia         |
| synthetic                                            |
| coal tar                                             |
| Streptomyces griseus                                 |
| synthetic                                            |
| salivary glands of Octopus vulgaris; also Capsicum   |
| Cinchona bark                                        |
| synthetic                                            |
| Penicillium brevicompactum and other Penicillium     |
| semisynthetic                                        |
| semisynthetic                                        |
| yeast                                                |
| synthetic                                            |
| Calumba root (Jateorhiza palmata)                    |
| synthetic                                            |
| Berberis spp                                         |
| constituent of mamalian feces, avian pigment         |
| Corynanthe spp                                       |
| Streptomyces antibioticus                            |
| synthetic                                            |
| widespread in plants                                 |
| Citrus spp                                           |
| Berberis and Mahonia spp                             |
| black pepper (Piper nigrum L.)                       |
| synthetic                                            |
| synthetic                                            |
| synthetic                                            |
| synthetic                                            |
| Acokanthera and Strophanthus spp                     |
| synthetic                                            |
| callabar bean, Physostigma venenosum                 |
| synthetic                                            |
| semisynthetic                                        |
| Aesculus hippocastanum, Fraxinus spp                 |
| synthetic                                            |
| semisynthetic                                        |
| synthetic                                            |
| synthetic                                            |
| synthetic                                            |
| synthetic                                            |
| pathological metabolite of tryptophan and kynurenine |
| semisynthetic                                        |
| Peganium harmala                                     |

|                                               |
|-----------------------------------------------|
| Veratrum album, V viride                      |
| synthetic                                     |
| Streptomyces alboniger                        |
| synthetic                                     |
| Strychnos nux-vomica and other Strychnos spp  |
| betel nuts (Arica catechu)                    |
| synthetic                                     |
| Lobelia spp                                   |
| synthetic; L-isomer: spectrum                 |
| Peganium harmala                              |
| epimer of aglycone Glycyrrhiza glabra         |
| Hydrastis canadensis                          |
| Anamirta cocculus, Menispermum cocculus       |
| semisynthetic; GS-2989, NSC-78502             |
| Solanaceae, Rhamnaceae, Passifloraceae,       |
| synthetic                                     |
| constituent of Bergamot oil                   |
| Agave and Yucca spp                           |
| thyroid gland                                 |
| Peganium harmala                              |
| synthetic                                     |
| Pinus, Scutellaria, and Ulnus spp             |
| synthetic                                     |
| synthetic                                     |
| Mimosa and Leucena spp                        |
| synthetic                                     |
| widely distributed in plants                  |
| synthetic                                     |
| allantoic fluid; widely distributed in plants |
| Chrysophyllum and Nocardia spp                |
| synthetic                                     |
| semisynthetic                                 |
| fish & liver oils, eggs, milk                 |
| synthetic                                     |
| semisynthetic                                 |

|                                         |
|-----------------------------------------|
| synthetic                               |
| semisynthetic                           |
| heartwood of Bignoniaceae               |
| synthetic                               |
| semisynthetic                           |
| synthetic; L-isomer                     |
| synthetic                               |
| <i>Atractylis gummifera</i>             |
| synthetic                               |
| semisynthetic                           |
| synthetic                               |
| semisynthetic                           |
| <i>Salvia dorisiana</i>                 |
| <i>Areca catechu</i>                    |
| synthetic                               |
| synthetic                               |
| synthetic                               |
| semisynthetic                           |
| synthetic                               |
| synthetic                               |
| <i>Streptomyces</i> spp                 |
| synthetic                               |
| semisynthetic                           |
| synthetic                               |
| synthetic                               |
| semisynthetic                           |
| synthetic                               |
| synthetic                               |
| synthetic                               |
| constituent of neroli and bergamot oils |
| synthetic                               |
| semisynthetic                           |
| synthetic                               |
| synthetic                               |
| liver, kidney, green plants and fungi   |
| synthetic                               |
| synthetic                               |

|                                              |
|----------------------------------------------|
| synthetic                                    |
| synthetic; ACPC                              |
| synthetic                                    |
| synthetic                                    |
| semisynthetic                                |
| synthetic                                    |
| semisynthetic                                |
| synthetic                                    |
| semisynthetic                                |
| Galanthus, Narcissus and other Lillaceae     |
| synthetic                                    |
| semisynthetic                                |
| synthetic                                    |
| synthetic; NPC-15199                         |
| Streptomyces fragilis                        |
| synthetic                                    |
| synthetic                                    |
| synthetic                                    |
| synthetic                                    |
| Abrus pectorius                              |
| Streptomyces cinnamomensis                   |
| synthetic                                    |
| Tolypocladium inflatum                       |
| synthetic                                    |
| common plant alkaloid                        |
| Chlorophora tinctoria                        |
| synthetic                                    |
| synthetic                                    |
| Mentha piperita and other Mentha spp         |
| synthetic                                    |
| Streptomyces rimosus paramomycinus           |
| synthetic                                    |
| semisynthetic; TAO, NSC-108166               |
| rat heart and liver                          |
| Hunteria eburnea                             |
| Tropaeolum majus, Lepidium sativum and other |
| synthetic                                    |
| synthetic                                    |
| synthetic                                    |
| synthetic                                    |

|                                      |
|--------------------------------------|
| synthetic                            |
| synthetic                            |
| synthetic                            |
| synthetic                            |
| Rheum spp and Eucalyptus sideroxylon |
| Vitamin B complex                    |
| synthetic                            |
| semisynthetic                        |
| synthetic                            |
| synthetic                            |
| semisynthetic                        |
| brain tissue                         |
| synthetic                            |
| ZPCK; synthetic                      |
| widely distributed in higher plants  |
| synthetic                            |
| semisynthetic                        |
| synthetic                            |
| synthetic                            |
| synthetic                            |
| plant and animal tissue              |
| synthetic                            |
| semisynthetic                        |
| synthetic                            |
| tuna muscle                          |
| Polygonum spp, Vitis vinifera        |
| Crotalaria spp                       |
| synthetic                            |
| synthetic                            |
| semisynthetic                        |
| synthetic                            |
| mamalian milk                        |
| Camptotheca acuminata                |
| Salix spp                            |
| Artemisia annua                      |
| synthetic                            |
| synthetic                            |
| Streptomyces lasaliensis             |
| synthetic                            |
| synthetic                            |

|                                          |
|------------------------------------------|
| synthetic                                |
| synthetic                                |
| synthetic                                |
| semisynthetic                            |
| semisynthetic                            |
| synthetic                                |
| Convallaria majalis                      |
| Xanthoria lichens, Rumex spp and various |
| synthetic                                |
| Celastrus and Maytenus spp               |
| synthetic                                |
| Streptomyces albus                       |
| synthetic                                |
| semisynthetic                            |
| Taxus brevifolia                         |
| synthetic                                |
| Scutellaria baicalensis                  |
| Cassia & Rheum spp                       |
| synthetic; 5-Cl isomer present           |
| Triclisia and Cyclea spp                 |
| synthetic                                |
| synthetic                                |
| synthetic                                |
| Melia azadirach and Azadirachta indica   |
| synthetic                                |
| animal tissue and Coprinus comatus       |
| Gossypium spp                            |
| synthetic                                |
| synthetic                                |
| widespread in Fabaceae                   |
| synthetic                                |
| synthetic                                |
| synthetic                                |
| Veratrum alba; contains 20% veratridine  |
| widespread in plants                     |
| synthetic                                |
| Anabasis aphylla                         |
| synthetic                                |
| synthetic                                |
| Delphinium spp                           |
| synthetic                                |
| synthetic                                |
| Rauwolfia, Aspidosperma and Vinca spp    |
| synthetic                                |
| synthetic                                |
| synthetic                                |
| Salsola richteri                         |
| synthetic                                |
| Pinus, Prunus, Eucalyptus spp            |
| Aspergillus, Streptomyces spp & other    |
| synthetic                                |

|                                                       |
|-------------------------------------------------------|
| sassafras officinale                                  |
| synthetic                                             |
| synthetic                                             |
| synthetic                                             |
| Ambrosia entemisiifolia                               |
| Thermopsis lanceolata                                 |
| Jasminium spp and Vicia faba                          |
| synthetic                                             |
| synthetic                                             |
| Streptomyces ambofaciens                              |
| synthetic                                             |
| Veratrum alba                                         |
| semisynthetic                                         |
| synthetic                                             |
| synthetic                                             |
| Penicillium cyclopium, Calopaca ferruginea            |
| principal constituent of tree galls, esp Quercus spp; |
| synthetic                                             |
| synthetic                                             |
| synthetic                                             |
| synthetic; W-7 HCl                                    |
| synthetic                                             |
| synthetic                                             |
| synthetic                                             |
| synthetic                                             |
| Betula spp.                                           |
| synthetic                                             |
| Corydalis spp                                         |
| synthetic                                             |
| derivative; rutin 7,3',4'-trihydroxyethyl ether       |
| Lycopodium spp                                        |
| synthetic                                             |
| Ginkgo biloba                                         |
| Silybum marianum                                      |
| synthetic                                             |
| Rubia and Gallium spp                                 |
| synthetic                                             |
| synthetic                                             |



|                                                   |
|---------------------------------------------------|
| synthetic                                         |
| Podophylum peltatum; epimer of podophyllotoxin;   |
| semisynthetic                                     |
| synthetic                                         |
| synthetic                                         |
| Epimedium spp                                     |
| synthetic                                         |
| Micromonospora spp                                |
| synthetic                                         |
| synthetic                                         |
| synthetic                                         |
| Jasminium spp and Vicia faba                      |
| semisynthetic; CL-983, FK-482                     |
| synthetic                                         |
| Streptomyces tenebrarius, Saccharomyces           |
| synthetic                                         |
| Allium spp, Wasabia japonica                      |
| synthetic                                         |
| synthetic; R-757, Th-22                           |
| synthetic                                         |
| synthetic; BMS-206584-01, AM-1155                 |
| synthetic                                         |
| synthetic; CGP-48933                              |
| Persea spp                                        |
| Centella asiatica                                 |
| synthetic                                         |
| synthetic                                         |
| synthetic                                         |
| silkworm moth Bombyx mori & the plant Achyranthes |
| synthetic                                         |
| synthetic; BAYm-1099                              |
| synthetic                                         |
| synthetic                                         |
| Persia spp                                        |
| synthetic                                         |
| Lupinus spp and other Leguminosae                 |
| Jateorhesa palmata, Berberis spp                  |
| semisynthetic                                     |
| Ocimum gratissimum                                |
| synthetic                                         |
| Streptomyces erythreus                            |
| synthetic                                         |
| synthetic                                         |

|                                                                            |
|----------------------------------------------------------------------------|
| synthetic                                                                  |
| synthetic; S9490-3, McN-A2833-109                                          |
| cytidine-5'-diphosphocholine                                               |
| Sinomenium acutum and Stephania cepharantha                                |
| synthetic; WY-21743                                                        |
| synthetic                                                                  |
| water soluble derivative of chlorophyll                                    |
| synthetic                                                                  |
| Brassica spp                                                               |
| synthetic                                                                  |
| synthetic                                                                  |
|                                                                            |
| Capsicum annum                                                             |
| synthetic                                                                  |
| synthetic                                                                  |
| leaves and nuts of Juglans spp., Carya spp and<br>several commercial woods |
| Glycyrrhiza glabra                                                         |
| semisynthetic                                                              |
| synthetic                                                                  |
| retina, whey and urine                                                     |
| Peonia spp                                                                 |
| Colchicum autumnale                                                        |
| semisynthetic                                                              |
| Nicotiana tabacum                                                          |
| Scopolia tanguticus                                                        |
| Maclura pomifera                                                           |
| Streptomyces fradiae                                                       |
| Stephania spp                                                              |
| synthetic; MK-341                                                          |
| Curcuma spp                                                                |
| synthetic                                                                  |
| Aspergillus spp                                                            |
| synthetic                                                                  |
| major component of human urine                                             |
| widespread in lichens                                                      |
| Celastrus scandens & Tripterygium wilfordii                                |
| synthetic                                                                  |
| synthetic                                                                  |
| Securinega spp and Phyllanthus discoides                                   |
| synthetic                                                                  |
| synthetic; CI-1008                                                         |
| synthetic                                                                  |
| synthetic                                                                  |
| synthetic                                                                  |
| Usnea, Cladonia and other lichen spp                                       |
| Tephrosia & Derris spp                                                     |
| synthetic                                                                  |
| semisynthetic                                                              |
| synthetic                                                                  |
| semisynthetic                                                              |

|                                                  |
|--------------------------------------------------|
| synthetic; BHT                                   |
| synthetic                                        |
| synthetic                                        |
| synthetic                                        |
| Rosaceae spp:                                    |
| Streptomyces species                             |
| synthetic                                        |
| semisynthetic                                    |
| synthetic                                        |
| synthetic; CRL-40476, CEP-1538                   |
| synthetic                                        |
| Digenia simplex                                  |
| synthetic                                        |
| synthetic                                        |
| Lupinus spp and other Leguminosae                |
| Derris spp                                       |
| synthetic                                        |
| synthetic                                        |
| synthetic                                        |
| synthetic                                        |
| metabolite in muscle and urine; renal metabolite |
| Podophylotoxin Podophylum peltatum               |
| synthetic                                        |
| adrenal glands                                   |
| semisynthetic                                    |
| Garcinia morella, G hanburyii                    |
| synthetic                                        |
| synthetic                                        |
| synthetic                                        |
| synthetic                                        |
| Paeonia montan, Xanthorrhoea spp                 |
| synthetic                                        |
| Vicia faba seedlings, Sarothamnus spp, & other   |
| Heracleum maximum root; mp 118-119 C             |
| widespread in Umbelliferae                       |
| Actinomyces spp                                  |
| synthetic                                        |
| semisynthetic                                    |
| synthetic                                        |
| synthetic                                        |

|                                                    |
|----------------------------------------------------|
| synthetic                                          |
| synthetic                                          |
| pineal gland                                       |
| synthetic                                          |
| synthetic                                          |
| semisynthetic                                      |
| semisynthetic                                      |
| synthetic                                          |
| SQ-13050; synthetic                                |
| semisynthetic                                      |
| synthetic                                          |
| synthetic                                          |
| Vinca minor                                        |
| synthetic                                          |
| synthetic                                          |
| synthetic                                          |
| synthetic                                          |
| semisynthetic                                      |
| Streptomyces aereofaciens, and other Streptomyces  |
| synthetic                                          |
| synthetic                                          |
| widely distributed in higher plants                |
| synthetic                                          |
| semisynthetic                                      |
| synthetic                                          |
| synthetic                                          |
| semisynthetic                                      |
| synthetic                                          |
| synthetic                                          |
| synthetic                                          |
| synthetic                                          |
| eucalyptus and lavender oils                       |
| semisynthetic; GS-3065                             |
| Aconitum spp                                       |
| semisynthetic                                      |
| Aspergillus clavatus, Penicillium patulum          |
| synthetic                                          |
| synthetic                                          |
| derivative of carnitine. striated muscle and liver |
| synthetic                                          |
| broad-bean seeds and brain tissue                  |

|                                              |
|----------------------------------------------|
| synthetic                                    |
| Rosmarinus officinalis, Melissa officinalis, |
| Rosaceae spp                                 |
| semisynthetic                                |
| synthetic                                    |
| synthetic                                    |
| synthetic                                    |
| synthetic                                    |
| Streptomyces hydroscopicus                   |
| synthetic                                    |
| semisynthetic                                |
| synthetic                                    |
| semisynthetic                                |
| synthetic                                    |
| semisynthetic                                |
| synthetic                                    |
| vincamine Vinca minor                        |
| synthetic                                    |
| synthetic                                    |
| synthetic                                    |

|                                 |
|---------------------------------|
| synthetic                       |
| synthetic                       |
| synthetic                       |
| synthetic                       |
| semisynthetic                   |
| synthetic                       |
| semisynthetic; RU-28965, RU-965 |
| synthetic                       |
| precursor to cysteamine         |
| synthetic                       |
| Streptomyces civiceus           |
| Streptomyces erythreus          |
| Ephedra vulgaris (MaHuang)      |
| synthetic                       |
| synthetic                       |
| Streptomyces griseolus          |
| synthetic                       |
| synthetic                       |
| synthetic                       |
| synthetic                       |
| synthetic; AG-63                |
| synthetic                       |
| synthetic                       |
| synthetic                       |
| synthetic                       |
| cysteamine                      |
| synthetic                       |
| semisynthetic                   |
| synthetic                       |
| synthetic                       |
| synthetic                       |
| Podophyllum spp                 |
| synthetic                       |
| synthetic                       |
| synthetic                       |
| synthetic                       |

|                                               |
|-----------------------------------------------|
| esters as constituent of pyrethrum flowers    |
| numerous Meliaceae species                    |
| synthetic                                     |
| synthetic                                     |
| synthetic                                     |
| synthetic; N,N-diethyltoluamide               |
| synthetic                                     |
| synthetic                                     |
| synthetic                                     |
| synthetic                                     |
| Coleus forskohlii                             |
| synthetic                                     |
| synthetic                                     |
| synthetic                                     |
| synthetic                                     |
| many Ephedra spp                              |
| semisynthetic                                 |
| synthetic                                     |
| synthetic                                     |
| Quassia amara, Picrasma excelsa and Ailanthus |
| synthetic; SKF-525A                           |
| irradiation of ergosterol                     |
| synthetic                                     |
| semisynthetic                                 |
| synthetic                                     |
| synthetic                                     |
| semisynthetic                                 |
| semisynthetic                                 |
| synthetic                                     |
| synthetic                                     |
| Penicillium citrinum                          |
| derivative                                    |
| semisynthetic                                 |
| semisynthetic                                 |
| semisynthetic                                 |
| synthetic                                     |
| semisynthetic                                 |
| synthetic                                     |
| semisynthetic                                 |
| semisynthetic                                 |
| parsley seed                                  |
| synthetic                                     |
| synthetic                                     |
| synthetic                                     |
| semisynthetic                                 |
| semisynthetic                                 |
| synthetic                                     |
| Schoenocaulon officinale; shown as cevadine   |
| synthetic                                     |
| synthetic                                     |

|                               |
|-------------------------------|
| Penicillium griseofulvum      |
| semisynthetic                 |
| synthetic                     |
| synthetic                     |
| synthetic                     |
| semisynthetic                 |
| synthetic                     |
| synthetic                     |
| Thevetia peruviana            |
| synthetic                     |
| Asplenium and Juglans spp.    |
| synthetic                     |
| synthetic                     |
| synthetic; THIP hydrochloride |
| semisynthetic                 |
| synthetic                     |
| Solanum spp.                  |
| semisynthetic                 |
| semisynthetic                 |
| synthetic                     |
| synthetic                     |







|                                                                 |
|-----------------------------------------------------------------|
|                                                                 |
|                                                                 |
|                                                                 |
|                                                                 |
|                                                                 |
|                                                                 |
|                                                                 |
|                                                                 |
|                                                                 |
|                                                                 |
|                                                                 |
| JACS 76:2943 (1954); Biochem Prep 12:81 (1968); J Steroid       |
|                                                                 |
|                                                                 |
|                                                                 |
|                                                                 |
|                                                                 |
|                                                                 |
|                                                                 |
|                                                                 |
|                                                                 |
|                                                                 |
|                                                                 |
|                                                                 |
|                                                                 |
|                                                                 |
|                                                                 |
|                                                                 |
|                                                                 |
|                                                                 |
|                                                                 |
|                                                                 |
| Nature 162: 524 (1948)                                          |
|                                                                 |
| Adv Carbohydr Chem 15:159 (1960); Methods Carbohydr Chem        |
|                                                                 |
|                                                                 |
|                                                                 |
|                                                                 |
|                                                                 |
|                                                                 |
|                                                                 |
|                                                                 |
|                                                                 |
|                                                                 |
| JACS 40:1716 (1918); J Biol Chem 180:703 (1949); Arzneim-Forsch |
|                                                                 |
|                                                                 |
|                                                                 |







|                                                                  |
|------------------------------------------------------------------|
|                                                                  |
|                                                                  |
|                                                                  |
| J Chem Soc 1954: 1242; Angew Chem., 68: 13 (1956)                |
|                                                                  |
|                                                                  |
|                                                                  |
|                                                                  |
|                                                                  |
|                                                                  |
|                                                                  |
|                                                                  |
| JACS 77: 1392, 2662 (1955); 78: 1375, 3693 (1956); 82: 3971      |
| J Nat Prod 28: 73 (1965); Can J Chem 58: 2770 (1980)             |
| J Indian Chem Soc 28: 225 (1951); 30: 705 (1953); Aust J Chem 9: |
| J Chem Soc 1950: 1534; Alkaloids 2: 406 (1952); Pharmacol Rev    |
|                                                                  |
| JACS 61: 175 (1939); Tetrahedron 19: 773 (1963)                  |
| Coll Czech Chem Comm 35:124 (1970); J Nat Prod 40:384 (1977);    |
| Tet Lett 1979: 1043                                              |
|                                                                  |
|                                                                  |
| Ann Rev Biochem 15: 155 (1946); Helv Chim Acta 42: 1418 (1959);  |
| J Chem Soc 1954: 3651                                            |
|                                                                  |
| Naturwiss 29: 650 (1941); Phytochemistry 11: 657 (1972)          |
|                                                                  |
|                                                                  |
|                                                                  |
| Mol Microbiol 42:553 (2001); BMC Physiology 1:7 (2001)           |
| Biochem J 27: 727 (1933); Phytochemistry 19: 1573 (1980)         |

|                                                                |
|----------------------------------------------------------------|
| J Biol Chem 149:271 (1943); JACS 82:2242, 2252 (1960); Planta  |
|                                                                |
|                                                                |
|                                                                |
| Ber 21: 3404 (1888); Biochem J 122: 503 (1971)                 |
|                                                                |
|                                                                |
| Ber 63: 120 (1930)                                             |
|                                                                |
| J Nat Prod 45: 105 (1982)                                      |
| JACS 57: 1111 (1935); 79: 5550 (1957); Chem Rev 67: 441 (1967) |
|                                                                |
| Chem Ber 103:3674 (1970); Experientia 28:380 (1972);           |
|                                                                |
| Indian J Chem 13: 835 (1975)                                   |
| Planta Med 63:199 (1997)                                       |
| Biochem J 20: 293, 300 (1926)                                  |
| Phytochemistry 7: 503 (1968)                                   |
|                                                                |
|                                                                |
|                                                                |
|                                                                |
|                                                                |
|                                                                |
|                                                                |
|                                                                |
|                                                                |
| Z Physiol Chem 244: 153 (1936)                                 |
|                                                                |
|                                                                |
|                                                                |
|                                                                |
|                                                                |
|                                                                |
|                                                                |
|                                                                |
| J Chem Soc 119: 1602 (1921); 1929: 2926; Phytochemistry 1: 215 |
|                                                                |
|                                                                |
|                                                                |
|                                                                |
|                                                                |
|                                                                |
|                                                                |
| JACS 100: 6218 (1978)                                          |
|                                                                |
|                                                                |
|                                                                |



|                                                                                      |
|--------------------------------------------------------------------------------------|
|                                                                                      |
|                                                                                      |
| Biochem Pharmacol 30: 1105 (1981)                                                    |
|                                                                                      |
|                                                                                      |
| Phytochemistry 14: 1829 (1975)                                                       |
|                                                                                      |
|                                                                                      |
|                                                                                      |
|                                                                                      |
|                                                                                      |
|                                                                                      |
|                                                                                      |
|                                                                                      |
| J Am Chem Soc 72: 2381 (1950); Experientia 26: 473 (1970); J Ber 51: 806, 976 (1918) |
|                                                                                      |
|                                                                                      |
|                                                                                      |
|                                                                                      |
|                                                                                      |
|                                                                                      |
|                                                                                      |
|                                                                                      |
|                                                                                      |
| J Pharmacol Exp Ther 275: 864 (1995)                                                 |
|                                                                                      |
|                                                                                      |
|                                                                                      |
|                                                                                      |
|                                                                                      |
|                                                                                      |
|                                                                                      |
| J Pharm Pharmacol 54:1521 (2002)                                                     |
|                                                                                      |
| J Steroid Biochem 20: 945 (1984)                                                     |
|                                                                                      |
|                                                                                      |
|                                                                                      |
|                                                                                      |



|                                                                  |
|------------------------------------------------------------------|
| J Biol Chem 256: 10217 (1981)                                    |
| Biochim Biophys Res Commun 189:280 (1992); Experientia 52:865    |
| Biochem J 274:885 (1991)                                         |
|                                                                  |
|                                                                  |
|                                                                  |
|                                                                  |
|                                                                  |
|                                                                  |
| PNAS 80:1116 (1983); Eur J Pharmacol 98:193 (1984); J Med        |
| J Biol Chem 252:5931 (1977)                                      |
| Biochemistry 10:3728 (1971); J Biol Chem 250:5221 (1975)         |
|                                                                  |
|                                                                  |
|                                                                  |
|                                                                  |
|                                                                  |
| Biochem Biophys Res Comm 177: 828 (1991)                         |
| PNAS 93:9090 (1996)                                              |
| Experientia 33:1348 (1977); 34:1052 (1978); Arch Int Pharmacodyn |
| Pharm Biol 11: 539 (1968)                                        |
|                                                                  |
|                                                                  |
| Toxicol Appl Pharmacol 21: 405 (1972)                            |
|                                                                  |
|                                                                  |
|                                                                  |
| J Biol Chem 255:401 (1980); Res Commun Chem Pathol Pharmacol     |
| Phytochemistry 13: 633 (1974); 15: 1791, 2006 (1976)             |
| J Am Chem Soc 72: 158 (1950)                                     |
|                                                                  |
|                                                                  |
|                                                                  |
|                                                                  |
|                                                                  |
| FEBS Lett 218:55 (1987)                                          |
| J Am Chem Soc 88: 3888 (1966)                                    |
|                                                                  |
|                                                                  |
|                                                                  |
| J Am Chem Soc 73: 5295 (1951)                                    |
|                                                                  |
|                                                                  |

|                                                                                                   |
|---------------------------------------------------------------------------------------------------|
|                                                                                                   |
|                                                                                                   |
|                                                                                                   |
|                                                                                                   |
|                                                                                                   |
|                                                                                                   |
| Phytochemistry 13: 1805 (1974)                                                                    |
| Helv Chim Acta 8: 140 (1925); Pharmacology 14: 1 (1976)                                           |
| Metabolism 50: 688 (2001)                                                                         |
|                                                                                                   |
| J Pharm Pharmacol 9: 855 (1957)                                                                   |
| J Antibiotics 27: 814 (1954)                                                                      |
|                                                                                                   |
|                                                                                                   |
| J Am Chem Soc 93: 2325 (1971)                                                                     |
|                                                                                                   |
| Gazz Chim acta 49 (II): 47 (1919); Acta Phytochim 1: 109 (1923);<br>Helv Chim Acta 33: 313 (1950) |
|                                                                                                   |
| Phytochemistry 14: 2524 (1975); Life Sci 68: 841 (2001)                                           |
|                                                                                                   |
|                                                                                                   |
| Phytochemistry 12: 391 (1973)                                                                     |
|                                                                                                   |
|                                                                                                   |
| J Am Chem Soc 60: 2193 (1938)                                                                     |
|                                                                                                   |
| Neuropharmacol 39: 1653 (2000)                                                                    |
| J Chem Soc 1953: 2183; Eur J Biochem 212: 87 (1992)                                               |
|                                                                                                   |
|                                                                                                   |
|                                                                                                   |
| PNAS 77:3957 (1980); Int J Oncol 12:717 (1998)                                                    |
| Helv Chim Acta 11: 1062 (1928)                                                                    |
|                                                                                                   |
| Carcinogenesis 21: 1879 (2000)                                                                    |
| J Am Chem Soc 80: 497 (1958); J Org Chem 46: 3284 (1981)                                          |
|                                                                                                   |
|                                                                                                   |
|                                                                                                   |
|                                                                                                   |
| Phytochemistry 12: 193 (1973); J Med Chem 33: 147 (1990)                                          |
|                                                                                                   |
| Acta Chem Scand 5: 1, 121, 129 (1951); Chem Nat Comp 1: 111<br>Nature 164: 575 (1949)             |
|                                                                                                   |

|                                                                    |
|--------------------------------------------------------------------|
| J Org Chem 13: 448 (1948)                                          |
|                                                                    |
|                                                                    |
| JACS 41:681 (1919); Science 263:966 (1994); Biochem J 316:247      |
| J Chem Soc 1932: 2778; Martindale 28th Ed, 1700 (1982)             |
| Helv Chim Acta 57: 1301 (1974); Tet Lett 3413 (1974); JACS 97:     |
|                                                                    |
| J Am Chem Soc 91: 3401 (1969)                                      |
|                                                                    |
|                                                                    |
|                                                                    |
| Helv Chim Acta 8: 126 (1925); Biochem J 34: 159 (1940)             |
| mixed galloyl esters of penta-o-galloylglucose (m-digalloyl shown) |
|                                                                    |
|                                                                    |
| J Biochem 96: 1721 (1984; J Pharmac Exp Ther 251: 764 (1989)       |
|                                                                    |
|                                                                    |
|                                                                    |
| Acta Chem Scand 19: 1661 (1965); Nature Medicine 1: 1046 (1995)    |
| Steroids 65: 171 (2000)                                            |
| Ber 56: 875 (1923); J Org Chem 33: 2785 (1968)                     |
|                                                                    |
| J Neurochem 54: 699 (1990)                                         |
|                                                                    |
|                                                                    |
|                                                                    |
| Tet Lett 1960 (10): 26; Can J Chem 64: 837 (1986); Adv Med 1: 175  |
|                                                                    |
| Toxicol Appl Pharmacol 73:411 (1984); Toxicol Lett 28:99 (1985)    |
| Biochim Biophys Acta 944: 383 (1988)                               |
|                                                                    |
|                                                                    |
|                                                                    |
| Chem Soc Rev 8: 499 (1979); Phytochemistry 43: 1333 (1996)         |
| Arzneim-Forsch 20: 1248 (1970); Chem Ber 108: 790, 1482 (1975);    |
| J Biochem Toxicol. 6: 37(1991); Arch Toxicol 75: 221 (2001)        |
| J Chem Soc 1928:229; 1929:1399; 1931:3206; Anticancer Res          |
|                                                                    |
|                                                                    |

|                                                                                                                                      |
|--------------------------------------------------------------------------------------------------------------------------------------|
| JACS 73: 2909 (1951); 75: 1308 (1953); J Med Chem 32: 604                                                                            |
|                                                                                                                                      |
| Eur J Clin Pharmacol 9: 253 (1976); Gastroenterology 124: 504<br>Planta Med 61: 523 (1995); J Chromatog A 963: 239 (2002)            |
|                                                                                                                                      |
| Antimicrob Agents Chemother 6:144 (1974); J Antibiotics 28:573                                                                       |
|                                                                                                                                      |
|                                                                                                                                      |
| Helv Chim Acta 57: 1301 (1974); Tet Lett 3413 (1974); JACS 97:                                                                       |
|                                                                                                                                      |
| J Org Chem 41: 2087 (1976); 43: 1430 (1978); Eur J Biochem 99:                                                                       |
|                                                                                                                                      |
| Arch Biochem Biophys 107:137 (1964); JACS 104:312 (1982);<br>Drugs 51:621 (1996)                                                     |
|                                                                                                                                      |
|                                                                                                                                      |
|                                                                                                                                      |
| An Acad Brasil Cienc 42 (suplemento): 45 (1970); Tetrahedron<br>Bull Soc Chim Fr 1967: 1890; Phytochemistry 7: 1385 (1968); 28:      |
|                                                                                                                                      |
| J Vet Med Sci 65:1275 (2003)                                                                                                         |
| J Med Chem 31:221 (1988); J Pharmacol Exp Ther 248:415 (1989)                                                                        |
| Yakugaku Zasshi 87: 325 (1967); Arch Insect Biochem Physiol 33:                                                                      |
|                                                                                                                                      |
|                                                                                                                                      |
|                                                                                                                                      |
| Ann Acad Brasil Cienc 42 (suplemento): 45 (1970); Tetrahedron 25:<br>Pestic Biochem Physiol 48: 202(1994); J Pesticide Reform 21: 15 |
|                                                                                                                                      |
| Am J Vet Res 38:465 (1977)                                                                                                           |
|                                                                                                                                      |
|                                                                                                                                      |
|                                                                                                                                      |
|                                                                                                                                      |
| J Chem Soc 1949: 663                                                                                                                 |
| Ber 58: 2267 (1925); J Nat Prod 28: 73 (1965)                                                                                        |
|                                                                                                                                      |
| CR Hebd Seances Acad Sci 249:306 (1959); Cancer Res 57:420<br>Biochem J 369:71 (2003)                                                |
|                                                                                                                                      |
|                                                                                                                                      |
|                                                                                                                                      |

|                                                                   |
|-------------------------------------------------------------------|
|                                                                   |
| J Neurochem 65: 889 (1995); Neurosci Lett 273: 163 (1999)         |
| Annalen 485: 247 (1931); J Chem Soc 1955: 3252; J                 |
|                                                                   |
| Mutat Res 308:191 (1994)                                          |
| Eur J Pharmacol 313:265 (1996)                                    |
| Anticancer Res 15:709 (1995); Biochem Mol Biol Int 39:1125 (1996) |
| Biochem Biophys Res Commun 228:153 (1996)                         |
| Eur J Pharmacol 310:115 (1996); TIPS 18:204 (1997)                |
|                                                                   |
|                                                                   |
|                                                                   |
| Can J Chem 34: 1562 (1956)                                        |
| Cancer Lett 168:125 (2001); Carcinogenesis 19:1697 (1998)         |
| Drugs 49:467 (1995)                                               |
| J Vet Pharmacol Ther 9:164 (1986); Psychopharmacol 52:107         |
| Helv Chim Acta 35:457 (1952); Tet. Lett.,1969:3489; JACS 98:830   |
| Tetrahedron 25:1825 (1969)                                        |
| Col Czech Chem Commun 19: 805 (1954)                              |
|                                                                   |
|                                                                   |
| Naturwissenschaften 49: 281 (1962)                                |
| J Am Chem Soc 63: 1253 (1941)                                     |
| Chem Ber 108:2481 (1975); Infection 5:183 (1977); Antimicrob      |
| Biochem Pharmacol 46:1887 (1993); Antimicrob Agents Chemother     |
| Br J Pharmacol 118:915 (1996); 122:1061 (1997); Eur J Pharmacol   |
| Ber 51: 1347 (1918); J Pharm Pharmacol 5: 448 (1953); Cancer Res  |
| J Med Chem 22:352 (1979)                                          |
|                                                                   |
|                                                                   |
| Z Physiol Chem 24: 364 (1898); Biochem Pharmacol 30: 325 (1981)   |
| J Am Chem Soc 72: 1824 (1950)                                     |
| J Chem Soc 1963: 2884; 1972: 330; J Org Chem 30: 1729 (1965)      |
| J Med Chem 28:1558 (1985); J Antimicrob Chemother 19:611          |
| Clin Endocrinol 10:655 (1979)                                     |
| Chem Ind 1962:1652; 1964:838, 1691; Naturwissenschaften 50:155    |
| Neurosci Lett140:225 (1992); Anesthesiology 76:844 (1992);        |
|                                                                   |
|                                                                   |
| Eur J Pharmacol 170: 35 (1989)                                    |
| J Med Chem 30: 1 (1987)                                           |
| J Neurochem 25: 797 (1975); Life Sci 19: 701 (1976)               |
| J Chem Soc, 1953, 603; Antibiotics I (Verlag), 1967, p 611        |
| J Am Chem Soc 56: 2415 (1934); J Org Chem 44: 2580 (1979);        |
| Biochem Pharmacol 50:1943 (1995); Cancer Chemother Pharmacol      |
| Cancer Metastasis Rev 6:615 (1987); Endocrin J 42:505 (1995)      |
| Arch Biochem Biophys 317:19 (1995); OphthalmolVis Sci 39:1888     |
|                                                                   |







|                                                                 |
|-----------------------------------------------------------------|
|                                                                 |
|                                                                 |
|                                                                 |
|                                                                 |
|                                                                 |
|                                                                 |
| J Org Chem 40: 1804 (1975); 41: 449 (1976); Drugs of the Future |
|                                                                 |
|                                                                 |
|                                                                 |
| J Med Chem 38: 3415 (1995)                                      |
|                                                                 |
|                                                                 |
|                                                                 |
|                                                                 |
|                                                                 |
|                                                                 |
|                                                                 |
|                                                                 |
| Drugs 61: 443 (2001)                                            |
|                                                                 |
| JACS 75: 4675 (1953)                                            |
|                                                                 |
|                                                                 |
|                                                                 |
|                                                                 |
|                                                                 |
|                                                                 |
|                                                                 |
|                                                                 |
| Mol Pharmacol 54: 162 (1998)                                    |
| Biochem Biophys Res Comm 176: 1136 (1991); Biochem J 298: 249   |
|                                                                 |
|                                                                 |
|                                                                 |
|                                                                 |
|                                                                 |
|                                                                 |
|                                                                 |
|                                                                 |
| Pharmacotherapy 31: 65 (1997)                                   |
|                                                                 |
|                                                                 |
| Arzneimittel-Forsch 26: 1907 (1976)                             |
|                                                                 |
| J Clin Psychiatry 45: 12 (1984); Int Pharmacopsychiatry 17: 21  |
|                                                                 |



|                                                                 |
|-----------------------------------------------------------------|
| J Chem Soc 1945: 283                                            |
| J Chem Soc 1960: 3827; 1962: 5095; 1967: 1026; 1969: 864; 1970, |
|                                                                 |
| Adv Drug Res 16: 309 (1987)                                     |
| Gen Pharmacol 21: 17 (1990)                                     |
|                                                                 |
|                                                                 |
| J Biol Chem 258:2960 (1983); J Med Chem 26:436, 486 (1983);     |
|                                                                 |
|                                                                 |
|                                                                 |
| JACS 60:1146 (1938); 72:375 (1950); Tetrahedron 15:100 (1961);  |
| Steroids 1959:90; Prog Chem Org Nat Prod 27:131 (1969)          |
|                                                                 |
|                                                                 |
|                                                                 |
|                                                                 |
|                                                                 |
| J Chem Soc 1963: 3777                                           |
|                                                                 |
|                                                                 |
|                                                                 |
|                                                                 |
|                                                                 |
|                                                                 |
| J Chem Soc 1963: 1477; Eur J Cancer 32A: 146 (1996); J Biol     |
|                                                                 |
|                                                                 |
|                                                                 |
|                                                                 |
|                                                                 |

|                                                                 |
|-----------------------------------------------------------------|
| J Chem Soc 1952: 3949                                           |
|                                                                 |
|                                                                 |
|                                                                 |
|                                                                 |
|                                                                 |
|                                                                 |
|                                                                 |
| Helv Chim Acta 35:673, 730, 1073; 36:370 (1952); 45:907 (1962); |
| J Nat Prod 47: 901 (1984)                                       |
|                                                                 |
| J Med Chem 24: 1377 (1981); 26: 895 (1983); Drugs of the Future |
|                                                                 |
|                                                                 |
| Chem Ber 90: 203 (1957)                                         |
|                                                                 |
|                                                                 |
|                                                                 |
|                                                                 |
